# Supplementary material
Source: PubMed Central journal article supplement (PMC4655518)
Supplement: pnas.1516573112.sapp.pdf [file pnas.1516573112.sapp.pdf]

*Supporting information for*

**LIFE AND EXTINCTION OF MEGAFaUNA IN THE  
ICE-AGE ARCTIC**

*Authors:* Daniel H. Mann<sup>1</sup>, Pamela Groves<sup>2</sup>, Richard E. Reanier<sup>3</sup>, Benjamin V. Gaglioti<sup>4</sup>,  
Michael L. Kunz<sup>5</sup>, Beth Shapiro<sup>6</sup>

*Authors affiliations:*

<sup>1</sup>*Geosciences Department, University of Alaska, Fairbanks, AK 99775*

<sup>2</sup>*Institute of Arctic Biology, University of Alaska, Fairbanks, AK 99775*

<sup>3</sup>*Reanier & Associates, Inc., 1215 SW 170th Street, Seattle, WA 98166*

<sup>4</sup>*Water and Environmental Research Center, University of Alaska, Fairbanks, AK 99775*

<sup>5</sup>*Cooperative Extension and Resources, University of Alaska, Fairbanks, AK 99775*

<sup>6</sup>*Department of Ecology and Evolutionary Biology and UCSC Genomics Institute, University of  
California Santa Cruz, Santa Cruz, CA 9506*

# 1: <sup>14</sup>C AGES OF ALASKAN NORTH SLOPE MEGAFUNA USED IN THIS STUDY

| Genus           | species        | field ID     | depository <sup>a</sup> | catalog number | skeletal element  | <sup>14</sup> CLab <sup>#</sup> and number | <sup>14</sup> C date reported (yrs BP) |                      | $\delta^{13}\text{C}$ ‰ (VPDB) | $\delta^{15}\text{N}$ ‰ (AIR) | $\delta^{13}\text{C}$ -normalized date used for calibration |                      | 95.4% calibrated range   |        | used in Monte Carlo (x) | source |
|-----------------|----------------|--------------|-------------------------|----------------|-------------------|--------------------------------------------|----------------------------------------|----------------------|--------------------------------|-------------------------------|-------------------------------------------------------------|----------------------|--------------------------|--------|-------------------------|--------|
|                 |                |              |                         |                |                   |                                            | <sup>14</sup> C date                   | std dev <sup>e</sup> |                                |                               | <sup>14</sup> C date                                        | std dev <sup>e</sup> | (cal yr BP) <sup>f</sup> |        |                         |        |
| <i>Alces</i>    | <i>alces</i>   | KIG05-4.1    | UAMES                   | 30186          | antler            | Beta-339266                                | modern                                 | -                    | -23.40                         | 0.50                          | -                                                           | -                    | -                        | -      |                         | (1)    |
| <i>Alces</i>    | <i>alces</i>   | MAY12-64     | UAMES                   | 30187          | antler            | Beta-339275                                | modern                                 | -                    | -21.30                         | 0.60                          | -                                                           | -                    | -                        | -      |                         | (1)    |
| <i>Alces</i>    | <i>alces</i>   | IK08-129     | UAMES                   | 30181          | antler            | Beta-339280                                | 210                                    | 30                   | -20.80                         | 0.70                          | 210                                                         | 30                   | ...                      | 305    |                         | (1)    |
| <i>Alces</i>    | <i>alces</i>   | TIT10-58     | UAMES                   | 30188          | antler            | Beta-339271                                | 290                                    | 30                   | -20.70                         | 0.90                          | 290                                                         | 30                   | 288                      | 458    |                         | (1)    |
| <i>Alces</i>    | <i>alces</i>   | IK12-094     | UAMES                   | 30184          | antler            | Beta-339281                                | 310                                    | 30                   | -21.10                         | -0.40                         | 310                                                         | 30                   | 301                      | 465    |                         | (1)    |
| <i>Alces</i>    | <i>alces</i>   | IK02-210     | UAMES                   | 10355          | mandible          | CAMS-91966                                 | 320                                    | 35                   | -20.30                         | 0.26                          | 320                                                         | 35                   | 304                      | 474    |                         | (1)    |
| <i>Alces</i>    | <i>alces</i>   | IK01-404     | UAMES                   | 11844          | mandible          | CAMS-92094                                 | 665                                    | 35                   | -20.87                         | -0.59                         | 665                                                         | 35                   | 556                      | 678    |                         | (1)    |
| <i>Alces</i>    | <i>alces</i>   | IK12-077     | UAMES                   | 30183          | cranium           | Beta-339274                                | 950                                    | 30                   | -20.70                         | 1.00                          | 950                                                         | 30                   | 795                      | 926    |                         | (1)    |
| <i>Alces</i>    | <i>alces</i>   | IK99-229     | UAMES                   | 10691          | mandible          | CAMS-64459                                 | 980                                    | 40                   | -20.00                         | 8.56                          | 980                                                         | 40                   | 795                      | 959    |                         | (1)    |
| <i>Alces</i>    | <i>alces</i>   | IK08-016     | UAMES                   | 30180          | mandible          | Beta-339268                                | 1,180                                  | 30                   | -21.30                         | 1.80                          | 1,180                                                       | 30                   | 999                      | 1,221  |                         | (1)    |
| <i>Alces</i>    | <i>alces</i>   | IK99-393     | n/a                     | n/a            | metatarsal        | Beta-134225                                | 1,280                                  | 40                   | -19.50                         | n/a                           | 1,280                                                       | 40                   | 1,086                    | 1,294  |                         | (1)    |
| <i>Alces</i>    | <i>alces</i>   | IK99-776     | UAMES                   | 11066          | mandible          | CAMS-64474                                 | 1,370                                  | 40                   | -20.40                         | 1.33                          | 1,370                                                       | 40                   | 1,186                    | 1,351  |                         | (1)    |
| <i>Alces</i>    | <i>alces</i>   | IK99-556     | UAMES                   | 10996          | mandible          | CAMS-64467                                 | 1,760                                  | 40                   | -19.85                         | 0.68                          | 1,760                                                       | 40                   | 1,566                    | 1,810  |                         | (1)    |
| <i>Alces</i>    | <i>alces</i>   | IK01-023     | UAMES                   | 12022          | mandible          | CAMS-92076                                 | 2,450                                  | 35                   | -20.77                         | 0.99                          | 2,450                                                       | 35                   | 2,360                    | 2,705  |                         | (1)    |
| <i>Alces</i>    | <i>alces</i>   | GAAR-7846    | n/a                     | n/a            | n.r. <sup>b</sup> | CAMS-58096                                 | 2,460                                  | 40                   | -21.00                         | n/a                           | 2,460                                                       | 40                   | 2,364                    | 2,710  |                         | (1)    |
| <i>Alces</i>    | <i>alces</i>   | IK98-0888    | UAMES                   | 3288           | mandible          | CAMS-64418                                 | 2,540                                  | 50                   | -20.26                         | n/a                           | 2,540                                                       | 50                   | 2,464                    | 2,756  |                         | (1)    |
| <i>Alces</i>    | <i>alces</i>   | IK12-096     | UAMES                   | 30185          | antler            | Beta-339282                                | 2,790                                  | 30                   | -21.30                         | -0.60                         | 2,790                                                       | 30                   | 2,795                    | 2,960  |                         | (1)    |
| <i>Alces</i>    | <i>alces</i>   | KIG09-2      | n/a                     | n/a            | cranium           | Beta-263035                                | 2,900                                  | 40                   | -21.10                         | n/a                           | 2,900                                                       | 40                   | 2,925                    | 3,165  |                         | (1)    |
| <i>Alces</i>    | <i>alces</i>   | TIT12-35     | UAMES                   | 30191          | antler            | Beta-339283                                | 9,310                                  | 40                   | -20.30                         | -1.20                         | 9,310                                                       | 40                   | 10,303                   | 10,654 | x                       | (1)    |
| <i>Alces</i>    | <i>alces</i>   | IK09-70      | UAMES                   | 30182          | antler            | Beta-339270                                | 9,610                                  | 40                   | -21.00                         | 0.90                          | 9,610                                                       | 40                   | 10,775                   | 11,161 | x                       | (1)    |
| <i>Alces</i>    | <i>alces</i>   | IK99-472     | UAMES                   | 10922          | tooth             | CAMS-91810                                 | 12,245                                 | 40                   | -20.30                         | -0.13                         | 12,245                                                      | 40                   | 14,000                   | 14,314 | x                       | (1)    |
| <i>Arctodus</i> | <i>simus</i>   | ROM:VP 43646 | n/a                     | n/a            | n.r. <sup>b</sup> | TO-2539                                    | 27,190                                 | 280                  | n/a                            | n/a                           | 27,190                                                      | 280                  | 30,805                   | 31,530 | x                       | (2)    |
| <i>Arctodus</i> | <i>simus</i>   | T99-033      | UAMES                   | 8685           | metapodial        | CAMS-58092 <sup>c</sup>                    | 42,600                                 | 2,200                | -19.00                         | n/a                           | 42,600                                                      | 2,200                | 43,570                   | ...    |                         | (1)    |
| <i>Arctodus</i> | <i>simus</i>   | T99-033      | UAMES                   | 8685           | metapodial        | CAMS-58095 <sup>c</sup>                    | 46,500                                 | 3,600                | -18.60                         | n/a                           | 46,500                                                      | 3,600                | 41,365                   | 64,621 |                         | (1)    |
| <i>Bison</i>    | <i>priscus</i> | IK98-0343    | UAMES                   | 9079           | humerus           | CAMS-53767                                 | 10,510                                 | 50                   | -20.61                         | 2.84                          | 10,510                                                      | 50                   | 12,173                   | 12,644 | x                       | (1)    |
| <i>Bison</i>    | <i>priscus</i> | IK98-1114    | UAMES                   | 9896           | astragalus        | CAMS-53891                                 | 10,990                                 | 50                   | -20.10                         | 2.65                          | 10,990                                                      | 50                   | 12,729                   | 12,996 | x                       | (1)    |

| Genus        | species        | field ID  | depository <sup>a</sup> | catalog number | skeletal element | <sup>14</sup> CLab# and number | <sup>14</sup> C date reported (yrs BP) |                      | $\delta^{13}\text{C}$ ‰ (VPDB) | $\delta^{15}\text{N}$ ‰ (AIR) | $\delta^{13}\text{C}$ -normalized date used for calibration |                      | 95.4% calibrated range   |        | used in Monte Carlo (x) | source |
|--------------|----------------|-----------|-------------------------|----------------|------------------|--------------------------------|----------------------------------------|----------------------|--------------------------------|-------------------------------|-------------------------------------------------------------|----------------------|--------------------------|--------|-------------------------|--------|
|              |                |           |                         |                |                  |                                | <sup>14</sup> C date                   | std dev <sup>e</sup> |                                |                               | <sup>14</sup> C date                                        | std dev <sup>e</sup> | (cal yr BP) <sup>f</sup> |        |                         |        |
| <i>Bison</i> | <i>priscus</i> | IK98-0027 | UAMES                   | 8847           | astragalus       | CAMS-53756                     | 11,810                                 | 50                   | -20.71                         | 2.63                          | 11,810                                                      | 50                   | 13,485                   | 13,756 | x                       | (1)    |
| <i>Bison</i> | <i>priscus</i> | IK98-0528 | UAMES                   | 9577           | humerus          | CAMS-53774                     | 12,270                                 | 50                   | -20.21                         | 4.10                          | 12,270                                                      | 50                   | 14,011                   | 14,487 | x                       | (1)    |
| <i>Bison</i> | <i>priscus</i> | IK98-0303 | n/a                     | n/a            | vertebra         | CAMS-58091                     | 12,320                                 | 60                   | -20.24                         | 3.69                          | 12,320                                                      | 60                   | 14,070                   | 14,686 | x                       | (1)    |
| <i>Bison</i> | <i>priscus</i> | IK98-0142 | UAMES                   | 8801           | metatarsal       | CAMS-53760                     | 12,410                                 | 50                   | -19.98                         | 2.66                          | 12,410                                                      | 50                   | 14,168                   | 14,846 | x                       | (1)    |
| <i>Bison</i> | <i>priscus</i> | IK01-428  | UAMES                   | 11664          | astragalus       | AA-48281                       | 12,560                                 | 130                  | -20.00                         | 2.66                          | 12,560                                                      | 130                  | 14,218                   | 15,247 | x                       | (1)    |
| <i>Bison</i> | <i>priscus</i> | IK98-0661 | UAMES                   | 9464           | metapodial       | CAMS-53777                     | 17,160                                 | 80                   | -20.18                         | 2.82                          | 17,160                                                      | 80                   | 20,476                   | 20,946 | x                       | (1)    |
| <i>Bison</i> | <i>priscus</i> | IK98-0504 | UAMES                   | 9238           | femur            | CAMS-53772                     | 19,420                                 | 100                  | -19.97                         | 3.84                          | 19,420                                                      | 100                  | 23,046                   | 23,682 | x                       | (1)    |
| <i>Bison</i> | <i>priscus</i> | IK98-1090 | UAMES                   | 9804           | astragalus       | CAMS-53890                     | 21,040                                 | 120                  | -20.04                         | 6.45                          | 21,040                                                      | 120                  | 25,093                   | 25,679 | x                       | (1)    |
| <i>Bison</i> | <i>priscus</i> | IK98-0401 | UAMES                   | 8842           | metatarsal       | CAMS-53770                     | 21,530                                 | 130                  | -20.37                         | 4.35                          | 21,530                                                      | 130                  | 25,591                   | 26,051 | x                       | (1)    |
| <i>Bison</i> | <i>priscus</i> | IK98-1254 | UAMES                   | 9967           | humerus          | CAMS-53901                     | 23,680                                 | 170                  | -19.85                         | 5.50                          | 23,680                                                      | 170                  | 27,495                   | 28,111 | x                       | (1)    |
| <i>Bison</i> | <i>priscus</i> | IK98-0302 | UAMES                   | 8998           | metatarsal       | CAMS-53764                     | 24,500                                 | 180                  | -20.22                         | 4.31                          | 24,500                                                      | 180                  | 28,092                   | 28,920 | x                       | (1)    |
| <i>Bison</i> | <i>priscus</i> | IK98-1184 | UAMES                   | 10031          | horn core        | CAMS-53899                     | 25,980                                 | 230                  | -19.70                         | 4.16                          | 25,980                                                      | 230                  | 29,604                   | 30,779 | x                       | (1)    |
| <i>Bison</i> | <i>priscus</i> | IK98-1043 | UAMES                   | 10043          | astragalus       | CAMS-53888                     | 26,550                                 | 230                  | -19.46                         | 5.66                          | 26,550                                                      | 230                  | 30,363                   | 31,129 | x                       | (1)    |
| <i>Bison</i> | <i>priscus</i> | IK98-0095 | UAMES                   | 9206           | tibia            | CAMS-53758                     | 27,400                                 | 260                  | -20.56                         | 4.57                          | 27,400                                                      | 260                  | 30,924                   | 31,706 | x                       | (1)    |
| <i>Bison</i> | <i>priscus</i> | IK98-0374 | n/a                     | n/a            | metatarsal       | CAMS-53768                     | 27,590                                 | 280                  | -20.48                         | 2.65                          | 27,590                                                      | 280                  | 30,998                   | 32,142 | x                       | (1)    |
| <i>Bison</i> | <i>priscus</i> | IK05-18.1 | UAMES                   | 29449          | cranium          | Beta-308262                    | 27,600                                 | 140                  | -20.10                         | n/a                           | 27,600                                                      | 140                  | 31,126                   | 31,620 | x                       | (1)    |
| <i>Bison</i> | <i>priscus</i> | IK98-1115 | UAMES                   | 9897           | astragalus       | CAMS-53892                     | 28,120                                 | 290                  | -19.32                         | 4.82                          | 28,120                                                      | 290                  | 31,329                   | 32,843 | x                       | (1)    |
| <i>Bison</i> | <i>priscus</i> | IK98-0616 | UAMES                   | 9648           | metacarpal       | CAMS-53775                     | 29,040                                 | 340                  | -20.20                         | 5.17                          | 29,040                                                      | 340                  | 32,228                   | 33,926 | x                       | (1)    |
| <i>Bison</i> | <i>priscus</i> | IK98-1164 | UAMES                   | 10073          | metacarpal       | CAMS-53897                     | 29,570                                 | 340                  | -20.02                         | 5.00                          | 29,570                                                      | 340                  | 32,999                   | 34,362 | x                       | (1)    |
| <i>Bison</i> | <i>priscus</i> | IK98-0430 | UAMES                   | 9038           | metacarpal       | CAMS-53771                     | 30,000                                 | 540                  | -20.00                         | n/a                           | 30,000                                                      | 540                  | 33,059                   | 35,128 | x                       | (1)    |
| <i>Bison</i> | <i>priscus</i> | IK98-0256 | UAMES                   | 9156           | metatarsal       | CAMS-53763                     | 31,410                                 | 420                  | -20.35                         | 4.23                          | 31,410                                                      | 420                  | 34,578                   | 36,209 | x                       | (1)    |
| <i>Bison</i> | <i>priscus</i> | IK98-0096 | UAMES                   | 9207           | tibia            | CAMS-53759                     | 31,630                                 | 440                  | -19.85                         | 4.89                          | 31,630                                                      | 440                  | 34,684                   | 36,430 | x                       | (1)    |
| <i>Bison</i> | <i>priscus</i> | IK98-1035 | UAMES                   | 9988           | humerus          | CAMS-53885                     | 32,270                                 | 470                  | -19.64                         | 5.34                          | 32,270                                                      | 470                  | 35,151                   | 37,726 | x                       | (1)    |
| <i>Bison</i> | <i>priscus</i> | IK01-215  | UAMES                   | 11742          | metatarsal       | AA-48772                       | 32,300                                 | 1,500                | -20.20                         | 4.43                          | 32,300                                                      | 1,500                | 33,894                   | 40,602 | x                       | (1)    |
| <i>Bison</i> | <i>priscus</i> | IK09-15   | UAMES                   | 29454          | cranium          | Beta-308267                    | 32,870                                 | 200                  | -19.90                         | n/a                           | 32,870                                                      | 200                  | 36,302                   | 37,701 | x                       | (1)    |
| <i>Bison</i> | <i>priscus</i> | IK01-433  | UAMES                   | 11669          | radius           | AA-48282                       | 33,000                                 | 1,500                | -19.90                         | 3.45                          | 33,000                                                      | 1,500                | 34,550                   | 41,204 | x                       | (1)    |
| <i>Bison</i> | <i>priscus</i> | IK98-0012 | UAMES                   | 9172           | femur            | CAMS-53755                     | 33,280                                 | 530                  | -19.43                         | 3.50                          | 33,280                                                      | 530                  | 36,231                   | 38,781 | x                       | (1)    |
| <i>Bison</i> | <i>priscus</i> | IK98-1323 | UAMES                   | 9877           | femur            | CAMS-53903                     | 33,320                                 | 540                  | -20.19                         | 4.40                          | 33,320                                                      | 540                  | 36,241                   | 38,847 | x                       | (1)    |
| <i>Bison</i> | <i>priscus</i> | IK01-460  | UAMES                   | 11934          | astragalus       | AA-48775                       | 33,520                                 | 940                  | -19.90                         | 5.13                          | 33,520                                                      | 940                  | 35,750                   | 40,210 | x                       | (1)    |
| <i>Bison</i> | <i>priscus</i> | IK98-1121 | UAMES                   | 11159          | metacarpal       | CAMS-53894                     | 33,580                                 | 550                  | -19.63                         | 3.84                          | 33,580                                                      | 550                  | 36,409                   | 39,200 | x                       | (1)    |
| <i>Bison</i> | <i>priscus</i> | IK01-234  | UAMES                   | 11947          | astragalus       | AA-48773                       | 34,100                                 | 1,000                | -20.00                         | 5.92                          | 34,100                                                      | 1,000                | 36,273                   | 40,970 | x                       | (1)    |

| Genus        | species        | field ID  | depository <sup>a</sup> | catalog number | skeletal element | <sup>14</sup> CLab# and number | <sup>14</sup> C date reported (yrs BP) |                      | $\delta^{13}\text{C}$ ‰ (VPDB) | $\delta^{15}\text{N}$ ‰ (AIR) | $\delta^{13}\text{C}$ -normalized date used for calibration |                      | 95.4% calibrated range   |        | used in Monte Carlo (x) | source |
|--------------|----------------|-----------|-------------------------|----------------|------------------|--------------------------------|----------------------------------------|----------------------|--------------------------------|-------------------------------|-------------------------------------------------------------|----------------------|--------------------------|--------|-------------------------|--------|
|              |                |           |                         |                |                  |                                | <sup>14</sup> C date                   | std dev <sup>e</sup> |                                |                               | <sup>14</sup> C date                                        | std dev <sup>e</sup> | (cal yr BP) <sup>f</sup> |        |                         |        |
| <i>Bison</i> | <i>priscus</i> | TIT11-88  | UAMES                   | 29460          | cranium          | Beta-308271                    | 34,440                                 | 240                  | -20.10                         | n/a                           | 34,440                                                      | 240                  | 38,455                   | 39,553 | x                       | (1)    |
| <i>Bison</i> | <i>priscus</i> | IK05-18.2 | UAMES                   | 29450          | cranium          | Beta-308263                    | 35,060                                 | 250                  | -20.50                         | n/a                           | 35,060                                                      | 250                  | 38,952                   | 40,228 | x                       | (1)    |
| <i>Bison</i> | <i>priscus</i> | IK98-0659 | UAMES                   | 9462           | mandible         | CAMS-53776                     | 35,580                                 | 720                  | -19.98                         | 4.56                          | 35,580                                                      | 720                  | 38,762                   | 41,626 | x                       | (1)    |
| <i>Bison</i> | <i>priscus</i> | IK98-0916 | UAMES                   | 9348           | astragalus       | CAMS-53782                     | 35,710                                 | 730                  | -20.29                         | 4.19                          | 35,710                                                      | 730                  | 38,863                   | 41,740 | x                       | (1)    |
| <i>Bison</i> | <i>priscus</i> | IK98-1222 | UAMES                   | 9899           | metatarsal       | CAMS-53900                     | 36,320                                 | 780                  | -20.77                         | 5.70                          | 36,320                                                      | 780                  | 39,422                   | 42,270 | x                       | (1)    |
| <i>Bison</i> | <i>priscus</i> | IK01-373  | UAMES                   | 11981          | astragalus       | AA-48278                       | 36,500                                 | 2,300                | -20.00                         | 6.37                          | 36,500                                                      | 2,300                | 36,515                   | 47,157 | x                       | (1)    |
| <i>Bison</i> | <i>priscus</i> | IK98-0863 | UAMES                   | 9327           | astragalus       | CAMS-53914                     | 36,520                                 | 800                  | -20.60                         | 4.51                          | 36,520                                                      | 800                  | 39,603                   | 42,435 | x                       | (1)    |
| <i>Bison</i> | <i>priscus</i> | IK98-1120 | UAMES                   | 9906           | metatarsal       | CAMS-53893                     | 37,460                                 | 890                  | -20.70                         | 6.66                          | 37,460                                                      | 890                  | 40,314                   | 43,280 | x                       | (1)    |
| <i>Bison</i> | <i>priscus</i> | IK11-37   | UAMES                   | 29457          | cranium          | Beta-306117                    | 38,010                                 | 370                  | -19.40                         | n/a                           | 38,010                                                      | 370                  | 41,739                   | 42,765 | x                       | (1)    |
| <i>Bison</i> | <i>priscus</i> | IK08-31   | UAMES                   | 29452          | cranium          | Beta-308265                    | 38,150                                 | 330                  | -20.20                         | n/a                           | 38,150                                                      | 330                  | 41,877                   | 42,800 | x                       | (1)    |
| <i>Bison</i> | <i>priscus</i> | IK98-0377 | UAMES                   | 8811           | radius           | CAMS-53769                     | 38,700                                 | 1,000                | -19.89                         | 4.46                          | 38,700                                                      | 1,000                | 41,431                   | 44,679 | x                       | (1)    |
| <i>Bison</i> | <i>priscus</i> | IK98-0889 | UAMES                   | 9343           | astragalus       | CAMS-53779                     | 38,800                                 | 1,100                | -20.31                         | 3.66                          | 38,800                                                      | 1,100                | 41,382                   | 45,006 | x                       | (1)    |
| <i>Bison</i> | <i>priscus</i> | IK98-0890 | UAMES                   | 9532           | astragalus       | CAMS-53780                     | 38,800                                 | 1,100                | -20.42                         | 5.26                          | 38,800                                                      | 1,100                | 41,382                   | 45,006 | x                       | (1)    |
| <i>Bison</i> | <i>priscus</i> | IK98-0915 | UAMES                   | 9347           | astragalus       | CAMS-53781                     | 39,800                                 | 1,200                | -20.34                         | 4.51                          | 39,800                                                      | 1,200                | 41,976                   | 46,005 | x                       | (1)    |
| <i>Bison</i> | <i>priscus</i> | IK98-0174 | UAMES                   | 8931           | astragalus       | CAMS-53761                     | 39,850                                 | 1,200                | -20.42                         | 4.50                          | 39,850                                                      | 1,200                | 42,006                   | 46,046 | x                       | (1)    |
| <i>Bison</i> | <i>priscus</i> | IK98-1122 | UAMES                   | 9919           | metacarpal       | CAMS-53895                     | 40,700                                 | 1,300                | -20.03                         | 4.30                          | 40,700                                                      | 1,300                | 42,415                   | 47,266 | x                       | (1)    |
| <i>Bison</i> | <i>priscus</i> | IK09-16   | UAMES                   | 29455          | cranium          | Beta-308268                    | 42,000                                 | 490                  | -19.60                         | n/a                           | 42,000                                                      | 490                  | 44,505                   | 46,280 | x                       | (1)    |
| <i>Bison</i> | <i>priscus</i> | TIT10-09  | UAMES                   | 29459          | cranium          | Beta-308270                    | 42,400                                 | 520                  | -20.10                         | n/a                           | 42,400                                                      | 520                  | 44,781                   | 46,761 | x                       | (1)    |
| <i>Bison</i> | <i>priscus</i> | IK98-1045 | UAMES                   | 10045          | mandible         | CAMS-53889                     | 43,000                                 | 1,800                | -20.21                         | 4.15                          | 43,000                                                      | 1,800                | 44,215                   | 49,997 | x                       | (1)    |
| <i>Bison</i> | <i>priscus</i> | IK10-12   | UAMES                   | 29456          | cranium          | Beta-308269                    | 44,520                                 | 650                  | -20.00                         | n/a                           | 44,520                                                      | 650                  | 46,411                   | 49,481 |                         | (1)    |
| <i>Bison</i> | <i>priscus</i> | IK98-1042 | n/a                     | n/a            | radius           | CAMS-53887                     | 44,800                                 | 2,200                | -19.59                         | 3.48                          | 44,800                                                      | 2,200                | 45,320                   | ...    |                         | (1)    |
| <i>Bison</i> | <i>priscus</i> | IK98-1125 | UAMES                   | 9923           | astragalus       | CAMS-53896                     | 45,300                                 | 2,400                | -20.01                         | 4.53                          | 45,300                                                      | 2,400                | 45,489                   | ...    |                         | (1)    |
| <i>Bison</i> | <i>priscus</i> | IK06-22   | UAMES                   | 29451          | cranium          | Beta-308264                    | 45,610                                 | 740                  | -20.10                         | n/a                           | 45,610                                                      | 740                  | 47,591                   | ...    |                         | (1)    |
| <i>Bison</i> | <i>priscus</i> | IK98-0032 | UAMES                   | 9090           | metacarpal       | CAMS-53757                     | 46,100                                 | 2,200                | -20.61                         | 3.26                          | 46,100                                                      | 2,200                | 46,180                   | ...    |                         | (1)    |
| <i>Bison</i> | <i>priscus</i> | IK98-0305 | UAMES                   | 8917           | radius           | CAMS-53766                     | 46,100                                 | 2,600                | -20.10                         | 5.65                          | 46,100                                                      | 2,600                | 45,831                   | ...    |                         | (1)    |
| <i>Bison</i> | <i>priscus</i> | IK09-14   | UAMES                   | 29453          | cranium          | Beta-308266                    | 46,280                                 | 810                  | -19.00                         | n/a                           | 46,280                                                      | 810                  | 48,108                   | ...    |                         | (1)    |
| <i>Bison</i> | <i>priscus</i> | IK98-0671 | UAMES                   | 9303           | metatarsal       | CAMS-53778                     | 47,000                                 | 2,900                | -20.46                         | 6.15                          | 47,000                                                      | 2,900                | 42,341                   | 59,391 |                         | (1)    |
| <i>Bison</i> | <i>priscus</i> | IK98-0928 | UAMES                   | 9506           | astragalus       | CAMS-53783                     | 49,600                                 | 4,000                | -20.25                         | -3.27                         | 49,600                                                      | 4,000                | 44,325                   | 70,774 |                         | (1)    |
| <i>Bison</i> | <i>priscus</i> | IK01-216  | UAMES                   | 11743          | metatarsal       | OxA-11136                      | 49,700                                 | 1,400                | -19.80                         | n/a                           | 49,700                                                      | 1,400                | 47,230                   | 53,285 |                         | (3)    |
| <i>Bison</i> | <i>priscus</i> | IK98-0527 | UAMES                   | 9567           | vertebra         | CAMS-53773                     | 50,000                                 | 4,200                | -20.70                         | 2.66                          | 50,000                                                      | 4,200                | 44,676                   | 72,630 |                         | (1)    |
| <i>Bison</i> | <i>priscus</i> | IK01-074  | UAMES                   | 11863          | metatarsal       | AA-48770                       | >38,000                                |                      | -20.00                         | 5.78                          | >38,000                                                     |                      | n/a                      | n/a    |                         | (1)    |

| Genus        | species        | field ID  | depository <sup>a</sup> | catalog number | skeletal element | <sup>14</sup> CLab# and number | <sup>14</sup> C date reported (yrs BP) |                      | $\delta^{13}\text{C}$ ‰ (VPDB) | $\delta^{15}\text{N}$ ‰ (AIR) | $\delta^{13}\text{C}$ -normalized date used for calibration |                      | 95.4% calibrated range   |        | used in Monte Carlo (x) | source     |
|--------------|----------------|-----------|-------------------------|----------------|------------------|--------------------------------|----------------------------------------|----------------------|--------------------------------|-------------------------------|-------------------------------------------------------------|----------------------|--------------------------|--------|-------------------------|------------|
|              |                |           |                         |                |                  |                                | <sup>14</sup> C date                   | std dev <sup>e</sup> |                                |                               | <sup>14</sup> C date                                        | std dev <sup>e</sup> | (cal yr BP) <sup>f</sup> |        |                         |            |
| <i>Bison</i> | <i>priscus</i> | IK99-501  | UAMES                   | 10881          | metatarsal       | AA-48766                       | >39,000                                |                      | -20.40                         | 3.98                          | >39,000                                                     |                      | n/a                      | n/a    |                         | (1)        |
| <i>Bison</i> | <i>priscus</i> | IK99-145  | UAMES                   | 10738          | cranium          | AA-48262                       | >39,400                                |                      | -19.10                         | 3.95                          | >39,400                                                     |                      | n/a                      | n/a    |                         | (1)        |
| <i>Bison</i> | <i>priscus</i> | IK01-315  | UAMES                   | 11687          | metacarpal       | AA-48774                       | >40,000                                |                      | -19.50                         | 7.64                          | >40,000                                                     |                      | n/a                      | n/a    |                         | (1)        |
| <i>Bison</i> | <i>priscus</i> | IK99-717  | UAMES                   | 11226          | astragalus       | AA-48247                       | >40,300                                |                      | -19.70                         | n/a                           | >40,300                                                     |                      | n/a                      | n/a    |                         | (1)        |
| <i>Bison</i> | <i>priscus</i> | IK01-098  | UAMES                   | 11770          | metatarsal       | AA-48270                       | >40,700                                |                      | -19.70                         | 5.87                          | >40,700                                                     |                      | n/a                      | n/a    |                         | (1)        |
| <i>Bison</i> | <i>priscus</i> | IK01-143  | UAMES                   | 11943          | metatarsal       | AA-48248                       | >40,900                                |                      | -19.99                         | 6.56                          | >40,900                                                     |                      | n/a                      | n/a    |                         | (1)        |
| <i>Bison</i> | <i>priscus</i> | IK01-095  | UAMES                   | 11701          | metacarpal       | AA-48269                       | >41,000                                |                      | -19.20                         | 4.91                          | >41,000                                                     |                      | n/a                      | n/a    |                         | (1)        |
| <i>Bison</i> | <i>priscus</i> | IK01-260  | UAMES                   | 12012          | radius           | AA-48274                       | >41,000                                |                      | -19.80                         | 6.50                          | >41,000                                                     |                      | n/a                      | n/a    |                         | (1)        |
| <i>Bison</i> | <i>priscus</i> | IK99-141  | UAMES                   | 11142          | astragalus       | AA-48243                       | >41,100                                |                      | -19.16                         | 2.80                          | >41,100                                                     |                      | n/a                      | n/a    |                         | (1)        |
| <i>Bison</i> | <i>priscus</i> | IK01-065  | UAMES                   | 11855          | astragalus       | AA-48266                       | >41,100                                |                      | -20.40                         | 4.26                          | >41,100                                                     |                      | n/a                      | n/a    |                         | (1)        |
| <i>Bison</i> | <i>priscus</i> | IK01-088  | UAMES                   | 11676          | metatarsal       | AA-48268                       | >41,100                                |                      | -20.20                         | 6.47                          | >41,100                                                     |                      | n/a                      | n/a    |                         | (1)        |
| <i>Bison</i> | <i>priscus</i> | IK99-530  | UAMES                   | 10858          | metacarpal       | AA-48767                       | >41,100                                |                      | -19.80                         | 6.89                          | >41,100                                                     |                      | n/a                      | n/a    |                         | (1)        |
| <i>Bison</i> | <i>priscus</i> | IK99-567  | UAMES                   | 11233          | astragalus       | AA-48246                       | >41,500                                |                      | -20.30                         | 6.23                          | >41,500                                                     |                      | n/a                      | n/a    |                         | (1)        |
| <i>Bison</i> | <i>priscus</i> | TIT11-92  | UAMES                   | 29461          | cranium          | Beta-306118                    | >43,500                                |                      | -18.10                         | n/a                           | >43,500                                                     |                      | n/a                      | n/a    |                         | (1)        |
| <i>Bison</i> | <i>priscus</i> | IK12-001  | UAMES                   | 29458          | skeleton         | Beta-324600                    | >43,500                                |                      | -20.00                         | 4.20                          | >43,500                                                     |                      | n/a                      | n/a    |                         | (1)        |
| <i>Bison</i> | <i>priscus</i> | IK98-0218 | UAMES                   | 8851           | astragalus       | CAMS-53762                     | >46,600                                |                      | -20.40                         | 2.69                          | >46,600                                                     |                      | n/a                      | n/a    |                         | (1)        |
| <i>Bison</i> | <i>priscus</i> | IK98-1041 | UAMES                   | 10041          | radius           | CAMS-53886                     | >48,500                                |                      | -19.52                         | 4.04                          | >48,500                                                     |                      | n/a                      | n/a    |                         | (1)        |
| <i>Bison</i> | <i>priscus</i> | IK98-1299 | UAMES                   | 9819           | ulna             | CAMS-53902                     | >49,500                                |                      | -20.05                         | 3.30                          | >49,500                                                     |                      | n/a                      | n/a    |                         | (1)        |
| <i>Bison</i> | <i>priscus</i> | IK98-1015 | UAMES                   | 9912           | horn core        | CAMS-53784                     | >49,900                                |                      | -20.36                         | 2.03                          | >49,900                                                     |                      | n/a                      | n/a    |                         | (1)        |
| <i>Bison</i> | <i>priscus</i> | IK98-1167 | UAMES                   | 10090          | astragalus       | CAMS-53898                     | >49,900                                |                      | -20.20                         | 4.86                          | >49,900                                                     |                      | n/a                      | n/a    |                         | (1)        |
| <i>Canis</i> | <i>lupus</i>   | TIT10-60  | UAMES                   | 30193          | mandible         | Beta-339272                    | 13,000                                 | 50                   | -18.10                         | 7.10                          | 13,000                                                      | 50                   | 15,316                   | 15,766 | x                       | (1)        |
| <i>Canis</i> | <i>lupus</i>   | IK99-702  | UAMES                   | 11055          | mandible         | CAMS-58094                     | 37,200                                 | 1,100                | -21.20                         | n/a                           | 37,200                                                      | 1,100                | 39,661                   | 43,604 | x                       | (1)        |
| <i>Canis</i> | <i>lupus</i>   | IK08-096  | UAMES                   | 30192          | femur            | Beta-339269                    | >43,500                                |                      | -20.00                         | 8.90                          | >43,500                                                     |                      | n/a                      | n/a    |                         | (1)        |
| <i>Equus</i> | <i>ferus</i>   | Tes57-02  | UAMES                   | 30196          | phalange         | Beta-339279                    | 10,570                                 | 40                   | -21.20                         | 2.50                          | 10,570                                                      | 40                   | 12,422                   | 12,660 | x                       | (1)        |
| <i>Equus</i> | <i>ferus</i>   | JDL12-1   | UAMES                   | 29462          | cranium          | Beta-331878 <sup>c</sup>       | 11,710                                 | 50                   | -20.70                         | 4.50                          | 11,710                                                      | 50                   | 13,715                   | 14,016 | x                       | (1)        |
| <i>Equus</i> | <i>ferus</i>   | JDL12-1   | UAMES                   | 29462          | cranium          | Beta-339258 <sup>c</sup>       | 12,240                                 | 50                   | -20.50                         | n/a                           | 12,240                                                      | 50                   | 13,973                   | 14,368 | x                       | this study |
| <i>Equus</i> | <i>ferus</i>   | IK01-353  | UAMES                   | 11953          | mandible         | CAMS-92091                     | 12,465                                 | 40                   | -20.59                         | 2.89                          | 12,465                                                      | 40                   | 14,273                   | 14,970 | x                       | (1)        |
| <i>Equus</i> | <i>ferus</i>   | IK02-109  | UAMES                   | 3294           | metacarpal       | CAMS-120651 <sup>c</sup>       | 12,480                                 | 35                   | -20.41                         | 5.50                          | 12,480                                                      | 35                   | 14,309                   | 14,997 | x                       | (1)        |
| <i>Equus</i> | <i>ferus</i>   | IK02-109  | UAMES                   | 3294           | metacarpal       | CAMS-121738 <sup>c</sup>       | 12,490                                 | 45                   | -20.40                         | 5.50                          | 12,490                                                      | 45                   | 14,314                   | 15,036 | x                       | (1)        |
| <i>Equus</i> | <i>ferus</i>   | IK99-033  | UAMES                   | 3300           | tooth            | CAMS-120673                    | 12,780                                 | 35                   | -20.67                         | 5.40                          | 12,780                                                      | 35                   | 15,089                   | 15,364 | x                       | (1)        |
| <i>Equus</i> | <i>ferus</i>   | IK07-08   | UAMES                   | 29463          | metacarpal       | Beta-331866 <sup>c</sup>       | 12,980                                 | 50                   | -20.80                         | 6.40                          | 12,980                                                      | 50                   | 15,298                   | 15,740 | x                       | (1)        |

| Genus        | species      | field ID   | depository <sup>a</sup> | catalog number | skeletal element  | <sup>14</sup> Clab# and number | <sup>14</sup> C date reported (yrs BP) |                      | $\delta^{13}\text{C}$ ‰ (VPDB) | $\delta^{15}\text{N}$ ‰ (AIR) | $\delta^{13}\text{C}$ -normalized date used for calibration |                      | 95.4% calibrated range   |        | used in Monte Carlo (x) | source     |
|--------------|--------------|------------|-------------------------|----------------|-------------------|--------------------------------|----------------------------------------|----------------------|--------------------------------|-------------------------------|-------------------------------------------------------------|----------------------|--------------------------|--------|-------------------------|------------|
|              |              |            |                         |                |                   |                                | <sup>14</sup> C date                   | std dev <sup>e</sup> |                                |                               | <sup>14</sup> C date                                        | std dev <sup>e</sup> | (cal yr BP) <sup>f</sup> |        |                         |            |
| <i>Equus</i> | <i>ferus</i> | IK07-08    | UAMES                   | 29463          | metacarpal        | Beta-345282 <sup>c</sup>       | 13,010                                 | 50                   | -20.50                         | n/a                           | 13,010                                                      | 50                   | 15,324                   | 15,779 | x                       | this study |
| <i>Equus</i> | <i>ferus</i> | TIT05-07.1 | UAMES                   | 29464          | metacarpal        | Beta-331882                    | 13,010                                 | 60                   | -20.70                         | 7.10                          | 13,010                                                      | 60                   | 15,308                   | 15,796 | x                       | (1)        |
| <i>Equus</i> | <i>ferus</i> | TIT10-35   | UAMES                   | 29465          | metacarpal        | Beta-331883                    | 13,400                                 | 50                   | -20.90                         | 8.40                          | 13,400                                                      | 50                   | 15,924                   | 16,299 | x                       | (1)        |
| <i>Equus</i> | <i>ferus</i> | IK98-0537  | UAMES                   | 3283           | metatarsal        | CAMS-91792                     | 13,685                                 | 40                   | -20.77                         | 6.60                          | 13,685                                                      | 40                   | 16,300                   | 16,747 | x                       | (1)        |
| <i>Equus</i> | <i>ferus</i> | IK98-0111  | UAMES                   | 3284           | metatarsal        | CAMS-120655                    | 13,925                                 | 40                   | -20.59                         | 7.00                          | 13,925                                                      | 40                   | 16,631                   | 17,071 | x                       | (1)        |
| <i>Equus</i> | <i>ferus</i> | TIT09-02   | UAMES                   | 29466          | cranium           | Beta-263037                    | 14,290                                 | 70                   | -20.90                         | n/a                           | 14,290                                                      | 70                   | 17,158                   | 17,620 | x                       | (1)        |
| <i>Equus</i> | <i>ferus</i> | TIT11-069  | UAMES                   | 29467          | mandible          | Beta-331887                    | 14,360                                 | 60                   | -20.40                         | 6.30                          | 14,360                                                      | 60                   | 17,263                   | 17,703 | x                       | (1)        |
| <i>Equus</i> | <i>ferus</i> | T04-001    | UAMES                   | 3289           | tibia             | CAMS-120711                    | 14,540                                 | 45                   | -20.98                         | 5.00                          | 14,540                                                      | 45                   | 17,550                   | 17,910 | x                       | (1)        |
| <i>Equus</i> | <i>ferus</i> | IK99-335   | UAMES                   | 3295           | metatarsal        | CAMS-120676                    | 15,095                                 | 40                   | -21.48                         | 7.00                          | 15,095                                                      | 40                   | 18,162                   | 18,505 | x                       | (1)        |
| <i>Equus</i> | <i>ferus</i> | MAY08-02   | UAMES                   | 29468          | cranium           | Beta-258461                    | 15,630                                 | 70                   | -20.20                         | n/a                           | 15,630                                                      | 70                   | 18,723                   | 19,036 | x                       | (1)        |
| <i>Equus</i> | <i>ferus</i> | IK99-065   | UAMES                   | 10693          | metacarpal        | Beta 369776 <sup>c</sup>       | 15,790                                 | 60                   | -20.80                         | n/a                           | 15,790                                                      | 60                   | 18,882                   | 19,217 | x                       | (1)        |
| <i>Equus</i> | <i>ferus</i> | IK99-065   | UAMES                   | 10693          | metacarpal        | Beta 369785 <sup>c</sup>       | 15,890                                 | 60                   | -20.60                         | 6.30                          | 15,890                                                      | 60                   | 18,960                   | 19,380 | x                       | (1)        |
| <i>Equus</i> | <i>ferus</i> | WC11-09    | UAMES                   | 29469          | phalange          | Beta-331891                    | 16,170                                 | 60                   | -20.40                         | 6.40                          | 16,170                                                      | 60                   | 19,290                   | 19,716 | x                       | (1)        |
| <i>Equus</i> | <i>ferus</i> | IK99-461   | UAMES                   | 3299           | metatarsal        | CAMS-120683                    | 16,885                                 | 45                   | -20.83                         | 6.40                          | 16,885                                                      | 45                   | 20,166                   | 20,545 | x                       | (1)        |
| <i>Equus</i> | <i>ferus</i> | IK99-514   | UAMES                   | 3290           | metacarpal        | CAMS-120685                    | 16,925                                 | 45                   | -20.97                         | 7.60                          | 16,925                                                      | 45                   | 20,221                   | 20,586 | x                       | (1)        |
| <i>Equus</i> | <i>ferus</i> | IK99-774   | UAMES                   | 3297           | metacarpal        | CAMS-92073                     | 17,290                                 | 60                   | -20.74                         | 5.38                          | 17,290                                                      | 60                   | 20,640                   | 21,065 | x                       | (1)        |
| <i>Equus</i> | <i>ferus</i> | IK99-562   | UAMES                   | 3286           | metatarsal        | CAMS-120700                    | 17,300                                 | 60                   | -21.29                         | 6.20                          | 17,300                                                      | 60                   | 20,650                   | 21,080 | x                       | (1)        |
| <i>Equus</i> | <i>ferus</i> | TIT10-03   | UAMES                   | 29470          | cranium           | Beta-283250                    | 17,670                                 | 70                   | -20.80                         | n/a                           | 17,670                                                      | 70                   | 21,080                   | 21,651 | x                       | (1)        |
| <i>Equus</i> | <i>ferus</i> | BR12-01    | UAMES                   | 29471          | astragalus        | Beta-331862 <sup>c</sup>       | 17,720                                 | 70                   | -20.80                         | 5.40                          | 17,720                                                      | 70                   | 21,171                   | 21,736 | x                       | (1)        |
| <i>Equus</i> | <i>ferus</i> | BR12-01    | UAMES                   | 29471          | astragalus        | Beta-339251 <sup>c</sup>       | 17,760                                 | 70                   | -20.60                         | n/a                           | 17,760                                                      | 70                   | 21,244                   | 21,785 | x                       | this study |
| <i>Equus</i> | <i>ferus</i> | n/a        | n/a                     | n/a            | n.r. <sup>b</sup> | I-9371                         | 19,250 <sup>d</sup>                    | 360                  | -21.10*                        | n/a                           | 19,314                                                      | 360                  | 22,477                   | 24,096 | x                       | (4)        |
| <i>Equus</i> | <i>ferus</i> | n/a        | n/a                     | n/a            | n.r. <sup>b</sup> | CAMS-145093                    | 19,830                                 | 100                  | n/a                            | n/a                           | 19,830                                                      | 100                  | 23,575                   | 24,148 | x                       | (5)        |
| <i>Equus</i> | <i>ferus</i> | IK98-0246  | UAMES                   | 3280           | metatarsal        | CAMS-120656 <sup>c</sup>       | 19,880                                 | 70                   | -20.71                         | 6.20                          | 19,880                                                      | 70                   | 23,679                   | 24,158 | x                       | (1)        |
| <i>Equus</i> | <i>ferus</i> | IK98-0246  | UAMES                   | 3280           | metatarsal        | CAMS-121741 <sup>c</sup>       | 19,900                                 | 60                   | -20.70                         | 6.20                          | 19,900                                                      | 60                   | 23,720                   | 24,170 | x                       | (1)        |
| <i>Equus</i> | <i>ferus</i> | IK02-191   | UAMES                   | 3298           | metacarpal        | CAMS-91964                     | 20,050                                 | 70                   | -20.51                         | 6.29                          | 20,050                                                      | 70                   | 23,890                   | 24,340 | x                       | (1)        |
| <i>Equus</i> | <i>ferus</i> | IK13-23    | UAMES                   | 32964          | radius            | Beta-362038                    | 20,070                                 | 80                   | -20.70                         | 6.10                          | 20,070                                                      | 80                   | 23,896                   | 24,374 | x                       | this study |
| <i>Equus</i> | <i>ferus</i> | T02-016    | UAMES                   | 3292           | metatarsal        | CAMS-120703                    | 20,190                                 | 70                   | -20.51                         | 6.90                          | 20,190                                                      | 70                   | 24,030                   | 24,483 | x                       | (1)        |
| <i>Equus</i> | <i>ferus</i> | IK01-342   | UAMES                   | 3285           | metacarpal        | CAMS-120647 <sup>c</sup>       | 20,640                                 | 80                   | -20.37                         | 6.60                          | 20,640                                                      | 80                   | 24,518                   | 25,189 | x                       | (1)        |
| <i>Equus</i> | <i>ferus</i> | IK01-342   | UAMES                   | 3285           | metacarpal        | CAMS-121734 <sup>c</sup>       | 20,720                                 | 90                   | -20.40                         | 6.60                          | 20,720                                                      | 90                   | 24,575                   | 25,286 | x                       | (1)        |
| <i>Equus</i> | <i>ferus</i> | n/a        | UAMES                   | n/a            | n.r. <sup>b</sup> | CAMS-145113                    | 20,720                                 | 110                  | n/a                            | n/a                           | 20,720                                                      | 110                  | 24,545                   | 25,311 | x                       | (5)        |

| Genus        | species      | field ID   | depository <sup>a</sup> | catalog number | skeletal element  | <sup>14</sup> CLab# and number | <sup>14</sup> C date reported (yrs BP) |                      | $\delta^{13}\text{C}$ ‰ (VPDB) | $\delta^{15}\text{N}$ ‰ (AIR) | $\delta^{13}\text{C}$ -normalized date used for calibration |                      | 95.4% calibrated range   |        | used in Monte Carlo (x) | source     |
|--------------|--------------|------------|-------------------------|----------------|-------------------|--------------------------------|----------------------------------------|----------------------|--------------------------------|-------------------------------|-------------------------------------------------------------|----------------------|--------------------------|--------|-------------------------|------------|
|              |              |            |                         |                |                   |                                | <sup>14</sup> C date                   | std dev <sup>e</sup> |                                |                               | <sup>14</sup> C date                                        | std dev <sup>e</sup> | (cal yr BP) <sup>f</sup> |        |                         |            |
| <i>Equus</i> | <i>ferus</i> | IK99-207   | UAMES                   | 3293           | metacarpal        | CAMS-91802                     | 20,850                                 | 80                   | -20.48                         | 5.85                          | 20,850                                                      | 80                   | 24,872                   | 25,481 | x                       | (1)        |
| <i>Equus</i> | <i>ferus</i> | n/a        | n/a                     | n/a            | n.r. <sup>b</sup> | I-9274                         | 20,810 <sup>d</sup>                    | 410                  | -21.10*                        | n/a                           | 20,874                                                      | 410                  | 24,179                   | 25,950 | x                       | (4)        |
| <i>Equus</i> | <i>ferus</i> | IK10-01    | UAMES                   | 29472          | cranium           | Beta-283242                    | 21,210                                 | 90                   | -20.80                         | n/a                           | 21,210                                                      | 90                   | 25,291                   | 25,779 | x                       | (1)        |
| <i>Equus</i> | <i>ferus</i> | AK-109-V-1 | UAMES                   | 23920          | mandible          | GX-13939                       | 21,220                                 | 800                  | n/a                            | n/a                           | 21,220                                                      | 800                  | 23,850                   | 27,316 | x                       | (4)        |
| <i>Equus</i> | <i>ferus</i> | AK-109-V-2 | UAMES                   | 23919          | radius            | GX-13941                       | 21,420                                 | 440                  | n/a                            | n/a                           | 21,420                                                      | 440                  | 24,583                   | 26,687 | x                       | (4)        |
| <i>Equus</i> | <i>ferus</i> | IK99-442   | UAMES                   | 3282           | metacarpal        | CAMS-91809                     | 21,560                                 | 80                   | -20.85                         | 5.91                          | 21,560                                                      | 80                   | 25,685                   | 26,016 | x                       | (1)        |
| <i>Equus</i> | <i>ferus</i> | IK99-789   | UAMES                   | 3291           | cranium           | CAMS-120702                    | 21,750                                 | 80                   | -20.95                         | 5.60                          | 21,750                                                      | 80                   | 25,825                   | 26,144 | x                       | (1)        |
| <i>Equus</i> | <i>ferus</i> | IK99-577   | UAMES                   | 10890          | metacarpal        | CAMS-91983                     | 22,110                                 | 90                   | -20.76                         | 5.44                          | 22,110                                                      | 90                   | 26,059                   | 26,595 | x                       | (1)        |
| <i>Equus</i> | <i>ferus</i> | IK10-073   | UAMES                   | 29473          | metacarpal        | Beta-331872 <sup>c</sup>       | 22,170                                 | 90                   | -20.90                         | 4.70                          | 22,170                                                      | 90                   | 26,100                   | 26,672 | x                       | (1)        |
| <i>Equus</i> | <i>ferus</i> | IK10-073   | UAMES                   | 29473          | metacarpal        | Beta-339244 <sup>c</sup>       | 22,300                                 | 100                  | -20.30                         | n/a                           | 22,300                                                      | 100                  | 26,204                   | 26,968 | x                       | this study |
| <i>Equus</i> | <i>ferus</i> | IK02-200   | UAMES                   | 10354          | mandible          | CAMS-91965                     | 22,330                                 | 90                   | -19.97                         | 4.81                          | 22,330                                                      | 90                   | 26,256                   | 26,997 | x                       | (1)        |
| <i>Equus</i> | <i>ferus</i> | IK99-430   | UAMES                   | 10715          | metatarsal        | CAMS-120682 <sup>c</sup>       | 22,410                                 | 80                   | -20.84                         | n/a                           | 22,410                                                      | 80                   | 26,406                   | 27,072 | x                       | (1)        |
| <i>Equus</i> | <i>ferus</i> | IK99-711   | UAMES                   | 10885          | metatarsal        | CAMS-120701                    | 22,450                                 | 90                   | -20.72                         | 6.20                          | 22,450                                                      | 90                   | 26,445                   | 27,110 | x                       | (1)        |
| <i>Equus</i> | <i>ferus</i> | IK99-430   | UAMES                   | 10715          | metatarsal        | CAMS-121755 <sup>c</sup>       | 22,600                                 | 90                   | -20.80                         | n/a                           | 22,600                                                      | 90                   | 26,581                   | 27,235 | x                       | (1)        |
| <i>Equus</i> | <i>ferus</i> | IK07-02    | UAMES                   | 29474          | metacarpal        | Beta-331864                    | 22,860                                 | 90                   | -20.30                         | 5.10                          | 22,860                                                      | 90                   | 26,998                   | 27,450 | x                       | (1)        |
| <i>Equus</i> | <i>ferus</i> | IK06-23    | UAMES                   | 30194          | cranium           | Beta-339267                    | 23,230                                 | 90                   | -19.70                         | 5.50                          | 23,230                                                      | 90                   | 27,310                   | 27,685 | x                       | (1)        |
| <i>Equus</i> | <i>ferus</i> | IK01-320   | UAMES                   | 11735          | metatarsal        | CAMS-120646 <sup>c</sup>       | 23,790                                 | 110                  | -20.88                         | 5.60                          | 23,790                                                      | 110                  | 27,639                   | 28,090 | x                       | (1)        |
| <i>Equus</i> | <i>ferus</i> | n/a        | n/a                     | n/a            | n.r. <sup>b</sup> | I-9318                         | 23,910 <sup>d</sup>                    | 470                  | -21.10*                        | n/a                           | 23,974                                                      | 470                  | 27,360                   | 29,039 | x                       | (4)        |
| <i>Equus</i> | <i>ferus</i> | IK01-320   | UAMES                   | 11735          | metatarsal        | CAMS-121733 <sup>c</sup>       | 24,070                                 | 100                  | -20.90                         | 5.60                          | 24,070                                                      | 100                  | 27,820                   | 28,414 | x                       | (1)        |
| <i>Equus</i> | <i>ferus</i> | IK08-080   | UAMES                   | 29484          | metacarpal        | Beta-331870                    | 24,690                                 | 110                  | -21.10                         | 4.80                          | 24,690                                                      | 110                  | 28,446                   | 28,987 | x                       | (1)        |
| <i>Equus</i> | <i>ferus</i> | IK08-082   | UAMES                   | 29483          | metacarpal        | Beta-346834 <sup>c</sup>       | 24,880                                 | 120                  | -20.80                         | n/a                           | 24,880                                                      | 120                  | 28,613                   | 29,267 |                         | this study |
| <i>Equus</i> | <i>ferus</i> | IK99-129   | UAMES                   | 10814          | mandible          | CAMS-91801                     | 24,900                                 | 100                  | -20.28                         | 4.90                          | 24,900                                                      | 100                  | 28,650                   | 29,245 | x                       | (1)        |
| <i>Equus</i> | <i>ferus</i> | n/a        | n/a                     | n/a            | n.r. <sup>b</sup> | AAR-11185                      | 25,460                                 | 230                  | n/a                            | n/a                           | 25,460                                                      | 230                  | 28,980                   | 30,299 | x                       | (5)        |
| <i>Equus</i> | <i>ferus</i> | T02-001    | UAMES                   | 8607           | mandible          | CAMS-91958                     | 25,680                                 | 140                  | -20.83                         | 3.70                          | 25,680                                                      | 140                  | 29,425                   | 30,350 | x                       | (1)        |
| <i>Equus</i> | <i>ferus</i> | IK99-367   | UAMES                   | 10548          | metatarsal        | CAMS-120679 <sup>c</sup>       | 26,020                                 | 120                  | -20.58                         | 5.30                          | 26,020                                                      | 120                  | 29,832                   | 30,713 | x                       | (1)        |
| <i>Equus</i> | <i>ferus</i> | IK01-218   | UAMES                   | 11745          | metatarsal        | CAMS-121731 <sup>c</sup>       | 26,130                                 | 120                  | -20.90                         | 6.00                          | 26,130                                                      | 120                  | 29,986                   | 30,808 | x                       | (1)        |
| <i>Equus</i> | <i>ferus</i> | IK12-063   | UAMES                   | 30195          | mandible          | Beta-339273                    | 26,190                                 | 120                  | -20.50                         | 7.70                          | 26,190                                                      | 120                  | 30,145                   | 30,875 | x                       | (1)        |
| <i>Equus</i> | <i>ferus</i> | IK01-218   | UAMES                   | 11745          | metatarsal        | CAMS-120717 <sup>c</sup>       | 26,210                                 | 130                  | -20.91                         | 6.00                          | 26,210                                                      | 130                  | 30,151                   | 30,896 | x                       | (1)        |
| <i>Equus</i> | <i>ferus</i> | IK13-36    | UAMES                   | 32959          | metacarpal        | Beta-362040                    | 26,380                                 | 120                  | -20.00                         | 4.10                          | 26,380                                                      | 120                  | 30,409                   | 30,960 | x                       | this study |
| <i>Equus</i> | <i>ferus</i> | IK99-367   | UAMES                   | 10548          | metatarsal        | CAMS-121752 <sup>c</sup>       | 26,460                                 | 130                  | -20.60                         | 5.30                          | 26,460                                                      | 130                  | 30,485                   | 31,007 | x                       | (1)        |

| Genus        | species      | field ID  | depository <sup>a</sup> | catalog number | skeletal element  | <sup>14</sup> Clab# and number | <sup>14</sup> C date reported (yrs BP) |                      | $\delta^{13}\text{C}$ ‰ (VPDB) | $\delta^{15}\text{N}$ ‰ (AIR) | $\delta^{13}\text{C}$ -normalized date used for calibration |                      | 95.4% calibrated range   |        | used in Monte Carlo (x) | source     |
|--------------|--------------|-----------|-------------------------|----------------|-------------------|--------------------------------|----------------------------------------|----------------------|--------------------------------|-------------------------------|-------------------------------------------------------------|----------------------|--------------------------|--------|-------------------------|------------|
|              |              |           |                         |                |                   |                                | <sup>14</sup> C date                   | std dev <sup>e</sup> |                                |                               | <sup>14</sup> C date                                        | std dev <sup>e</sup> | (cal yr BP) <sup>f</sup> |        |                         |            |
| <i>Equus</i> | <i>ferus</i> | KIK08-01  | UAMES                   | 29475          | metacarpal        | Beta-331879                    | 26,770                                 | 140                  | -21.60                         | 4.60                          | 26,770                                                      | 140                  | 30,720                   | 31,146 | x                       | (1)        |
| <i>Equus</i> | <i>ferus</i> | IK11-001  | UAMES                   | 29476          | metacarpal        | Beta-331874                    | 26,890                                 | 150                  | -20.80                         | 4.50                          | 26,890                                                      | 150                  | 30,777                   | 31,209 | x                       | (1)        |
| <i>Equus</i> | <i>ferus</i> | TIT11-070 | UAMES                   | 29477          | mandible          | Beta-331888                    | 27,060                                 | 140                  | -20.60                         | 7.40                          | 27,060                                                      | 140                  | 30,870                   | 31,283 | x                       | (1)        |
| <i>Equus</i> | <i>ferus</i> | IK01-080  | UAMES                   | 11647          | mandible          | CAMS-92078 <sup>c</sup>        | 27,810                                 | 210                  | -21.06                         | 5.37                          | 27,810                                                      | 210                  | 31,165                   | 32,232 | x                       | (1)        |
| <i>Equus</i> | <i>ferus</i> | IK12-015  | UAMES                   | 29478          | metacarpal        | Beta-331877                    | 27,930                                 | 150                  | -20.70                         | 6.40                          | 27,930                                                      | 150                  | 31,284                   | 32,209 | x                       | (1)        |
| <i>Equus</i> | <i>ferus</i> | IK97-102  | UAMES                   | 8622           | metacarpal        | Beta-117138                    | 28,120                                 | 250                  | -24.50                         | n/a                           | 28,120                                                      | 250                  | 31,368                   | 32,754 | x                       | (1)        |
| <i>Equus</i> | <i>ferus</i> | IK01-459  | UAMES                   | 11933          | metapodial        | CAMS-91957                     | 28,260                                 | 210                  | -20.92                         | 7.56                          | 28,260                                                      | 210                  | 31,511                   | 32,818 | x                       | (1)        |
| <i>Equus</i> | <i>ferus</i> | IK10-074  | UAMES                   | 29479          | metacarpal        | Beta-331873                    | 28,330                                 | 150                  | -20.60                         | 5.00                          | 28,330                                                      | 150                  | 31,648                   | 32,788 | x                       | (1)        |
| <i>Equus</i> | <i>ferus</i> | IK13-35   | UAMES                   | 32961          | metatarsal        | Beta-362039                    | 28,500                                 | 150                  | -20.80                         | 10.30                         | 28,500                                                      | 150                  | 31,818                   | 33,018 | x                       | this study |
| <i>Equus</i> | <i>ferus</i> | IK99-244  | UAMES                   | 10834          | metacarpal        | CAMS-120675                    | 28,500                                 | 160                  | -20.58                         | 8.20                          | 28,500                                                      | 160                  | 31,796                   | 33,041 | x                       | (1)        |
| <i>Equus</i> | <i>ferus</i> | IK98-1176 | UAMES                   | 10009          | metacarpal        | CAMS-91797                     | 28,500                                 | 200                  | -20.87                         | 5.14                          | 28,500                                                      | 200                  | 31,722                   | 33,143 | x                       | (1)        |
| <i>Equus</i> | <i>ferus</i> | T04-004   | UAMES                   | 11353          | radius            | CAMS-120712                    | 28,540                                 | 170                  | -21.29                         | 6.10                          | 28,540                                                      | 170                  | 31,826                   | 33,142 | x                       | (1)        |
| <i>Equus</i> | <i>ferus</i> | IK01-080  | UAMES                   | 11647          | mandible          | CAMS-91781 <sup>c</sup>        | 28,600                                 | 200                  | -21.06                         | 5.37                          | 28,600                                                      | 200                  | 31,860                   | 33,315 | x                       | (1)        |
| <i>Equus</i> | <i>ferus</i> | IK01-368  | UAMES                   | 12011          | metatarsal        | CAMS-121736                    | 28,690                                 | 160                  | -21.20                         | 7.60                          | 28,690                                                      | 160                  | 32,146                   | 33,389 | x                       | (1)        |
| <i>Equus</i> | <i>ferus</i> | n/a       | n/a                     | n/a            | n.r. <sup>b</sup> | USGS-804                       | 28,700                                 | 460                  | n/a                            | n/a                           | 28,700                                                      | 460                  | 31,572                   | 33,745 | x                       | (2)        |
| <i>Equus</i> | <i>ferus</i> | IK06-17   | UAMES                   | 29480          | metacarpal        | Beta-331863                    | 29,560                                 | 150                  | -20.90                         | 6.50                          | 29,560                                                      | 150                  | 33,474                   | 34,030 | x                       | (1)        |
| <i>Equus</i> | <i>ferus</i> | IK99-254  | UAMES                   | 10644          | metacarpal        | CAMS-91806                     | 29,700                                 | 200                  | -21.23                         | 9.81                          | 29,700                                                      | 200                  | 33,515                   | 34,201 | x                       | (1)        |
| <i>Equus</i> | <i>ferus</i> | IK99-383  | UAMES                   | 11205          | metatarsal        | CAMS-120680 <sup>c</sup>       | 29,830                                 | 190                  | -21.26                         | 6.40                          | 29,830                                                      | 190                  | 33,620                   | 34,294 | x                       | (1)        |
| <i>Equus</i> | <i>ferus</i> | TIT11-071 | UAMES                   | 29481          | mandible          | Beta-343824 <sup>c</sup>       | 29,880                                 | 180                  | -20.90                         | n/a                           | 29,880                                                      | 180                  | 33,664                   | 34,324 | x                       | this study |
| <i>Equus</i> | <i>ferus</i> | IK07-06   | UAMES                   | 29495          | metacarpal        | Beta-339236 <sup>c</sup>       | 30,030                                 | 180                  | -21.40                         | n/a                           | 30,030                                                      | 180                  | 33,769                   | 34,471 | x                       | this study |
| <i>Equus</i> | <i>ferus</i> | TIT11-071 | UAMES                   | 29481          | mandible          | Beta-331889 <sup>c</sup>       | 30,260                                 | 190                  | -20.90                         | 6.80                          | 30,260                                                      | 190                  | 33,921                   | 34,660 | x                       | (1)        |
| <i>Equus</i> | <i>ferus</i> | IK07-06   | UAMES                   | 29495          | metacarpal        | Beta-331865 <sup>c</sup>       | 30,560                                 | 160                  | -21.10                         | 5.80                          | 30,560                                                      | 160                  | 34,159                   | 34,843 | x                       | (1)        |
| <i>Equus</i> | <i>ferus</i> | IK99-383  | UAMES                   | 11205          | metatarsal        | CAMS-121753 <sup>c</sup>       | 30,560                                 | 200                  | -21.30                         | 6.40                          | 30,560                                                      | 200                  | 34,110                   | 34,892 | x                       | (1)        |
| <i>Equus</i> | <i>ferus</i> | TIT11-072 | UAMES                   | 29482          | mandible          | Beta-331890 <sup>c</sup>       | 30,610                                 | 200                  | -21.70                         | 8.10                          | 30,610                                                      | 200                  | 34,144                   | 34,936 | x                       | (1)        |
| <i>Equus</i> | <i>ferus</i> | TIT11-072 | UAMES                   | 29482          | mandible          | Beta-339257 <sup>c</sup>       | 30,790                                 | 190                  | -21.10                         | n/a                           | 30,790                                                      | 190                  | 34,300                   | 35,101 | x                       | this study |
| <i>Equus</i> | <i>ferus</i> | IK98-0539 | UAMES                   | 9548           | mandible          | CAMS-91793                     | 30,900                                 | 300                  | -21.16                         | 7.87                          | 30,900                                                      | 300                  | 34,238                   | 35,479 | x                       | (1)        |
| <i>Equus</i> | <i>ferus</i> | IK01-183  | UAMES                   | 11878          | metatarsal        | CAMS-92083                     | 31,230                                 | 270                  | -21.70                         | 5.32                          | 31,230                                                      | 270                  | 34,613                   | 35,732 | x                       | (1)        |
| <i>Equus</i> | <i>ferus</i> | IK08-082  | UAMES                   | 29483          | metacarpal        | Beta-331869 <sup>c</sup>       | 31,680                                 | 190                  | -21.00                         | 7.40                          | 31,680                                                      | 190                  | 35,094                   | 36,055 | x                       | (1)        |
| <i>Equus</i> | <i>ferus</i> | TIT10-38  | UAMES                   | 29485          | metacarpal        | Beta-331886 <sup>c</sup>       | 32,250                                 | 220                  | -21.30                         | 5.10                          | 32,250                                                      | 220                  | 35,628                   | 36,641 | x                       | (1)        |
| <i>Equus</i> | <i>ferus</i> | IK08-081  | UAMES                   | 33201          | metacarpal        | Beta 369779 <sup>c</sup>       | 32,270                                 | 280                  | -20.90                         | n/a                           | 32,270                                                      | 280                  | 35,518                   | 36,877 | x                       | this study |



| Genus        | species      | field ID  | depository <sup>a</sup> | catalog number | skeletal element  | <sup>14</sup> CLab# and number | <sup>14</sup> C date reported (yrs BP) |                      | $\delta^{13}\text{C}$ ‰ (VPDB) | $\delta^{15}\text{N}$ ‰ (AIR) | $\delta^{13}\text{C}$ -normalized date used for calibration |                      | 95.4% calibrated range   |        | used in Monte Carlo (x) | source     |
|--------------|--------------|-----------|-------------------------|----------------|-------------------|--------------------------------|----------------------------------------|----------------------|--------------------------------|-------------------------------|-------------------------------------------------------------|----------------------|--------------------------|--------|-------------------------|------------|
|              |              |           |                         |                |                   |                                | <sup>14</sup> C date                   | std dev <sup>e</sup> |                                |                               | <sup>14</sup> C date                                        | std dev <sup>e</sup> | (cal yr BP) <sup>f</sup> |        |                         |            |
| <i>Equus</i> | <i>ferus</i> | n/a       | n/a                     | n/a            | n.r. <sup>b</sup> | I-9275                         | 32,270 <sup>d</sup>                    | 1,500                | -21.10*                        | n/a                           | 32,334                                                      | 1,500                | 33,921                   | 40,629 | x                       | (4)        |
| <i>Equus</i> | <i>ferus</i> | IK98-1142 | UAMES                   | 9972           | mandible          | CAMS-91796                     | 32,600                                 | 300                  | -21.13                         | 5.13                          | 32,600                                                      | 300                  | 35,853                   | 37,654 | x                       | (1)        |
| <i>Equus</i> | <i>ferus</i> | IK01-282  | UAMES                   | 11794          | metacarpal        | CAMS-92089                     | 32,700                                 | 300                  | -20.87                         | 4.47                          | 32,700                                                      | 300                  | 35,994                   | 37,816 | x                       | (1)        |
| <i>Equus</i> | <i>ferus</i> | TIT10-38  | UAMES                   | 29485          | metacarpal        | Beta-339248c                   | 32,980                                 | 260                  | -21.30                         | n/a                           | 32,980                                                      | 260                  | 36,340                   | 38,056 | x                       | this study |
| <i>Equus</i> | <i>ferus</i> | IK09-51   | UAMES                   | 29486          | metacarpal        | Beta-339242 <sup>c</sup>       | 33,090                                 | 240                  | -23.00                         | n/a                           | 33,090                                                      | 240                  | 36,477                   | 38,154 |                         | this study |
| <i>Equus</i> | <i>ferus</i> | IK09-51   | UAMES                   | 29486          | metacarpal        | Beta-331871 <sup>c</sup>       | 33,150                                 | 200                  | -21.60                         | 5.50                          | 33,150                                                      | 200                  | 36,602                   | 38,157 | x                       | (1)        |
| <i>Equus</i> | <i>ferus</i> | TIT10-36  | UAMES                   | 29487          | metacarpal        | Beta-331884 <sup>c</sup>       | 33,200                                 | 240                  | -21.40                         | 6.20                          | 33,200                                                      | 240                  | 36,615                   | 38,277 | x                       | (1)        |
| <i>Equus</i> | <i>ferus</i> | TIT10-36  | UAMES                   | 29487          | metacarpal        | Beta-339255 <sup>c</sup>       | 33,250                                 | 240                  | -21.40                         | n/a                           | 33,250                                                      | 240                  | 36,678                   | 38,325 | x                       | (1)        |
| <i>Equus</i> | <i>ferus</i> | IK98-0288 | UAMES                   | 8859           | metatarsal        | CAMS-120721 <sup>c</sup>       | 33,420                                 | 340                  | -21.45                         | 6.80                          | 33,420                                                      | 340                  | 36,670                   | 38,575 | x                       | (1)        |
| <i>Equus</i> | <i>ferus</i> | IK08-081  | UAMES                   | 33201          | metacarpal        | Beta 369782 <sup>c</sup>       | 33,700                                 | 300                  | -22.00                         | 7.40                          | 33,700                                                      | 300                  | 37,049                   | 38,800 |                         | this study |
| <i>Equus</i> | <i>ferus</i> | IK98-0112 | UAMES                   | 9021           | metacarpal        | CAMS-91790                     | 33,800                                 | 400                  | -21.09                         | 7.91                          | 33,800                                                      | 400                  | 36,900                   | 39,162 | x                       | (1)        |
| <i>Equus</i> | <i>ferus</i> | IK98-0288 | UAMES                   | 8859           | metatarsal        | CAMS-121742 <sup>c</sup>       | 33,820                                 | 290                  | -21.50                         | 6.80                          | 33,820                                                      | 290                  | 37,272                   | 38,959 | x                       | (1)        |
| <i>Equus</i> | <i>ferus</i> | IK99-790  | UAMES                   | 10910          | mandible          | CAMS-92074                     | 33,870                                 | 350                  | -20.72                         | 5.86                          | 33,870                                                      | 350                  | 37,126                   | 39,162 | x                       | (1)        |
| <i>Equus</i> | <i>ferus</i> | IK01-369  | UAMES                   | 11973          | metacarpal        | CAMS-92093 <sup>c</sup>        | 33,900                                 | 400                  | -21.16                         | 5.87                          | 33,900                                                      | 400                  | 37,037                   | 39,336 | x                       | (1)        |
| <i>Equus</i> | <i>ferus</i> | KIG05-2.2 | UAMES                   | 32769          | metacarpal        | Beta 369781 <sup>c</sup>       | 34,000                                 | 270                  | -21.10                         | 8.50                          | 34,000                                                      | 270                  | 37,729                   | 39,161 | x                       | (1)        |
| <i>Equus</i> | <i>ferus</i> | IK01-369  | UAMES                   | 11973          | metacarpal        | CAMS-91782 <sup>c</sup>        | 34,200                                 | 400                  | -21.16                         | 5.87                          | 34,200                                                      | 400                  | 37,694                   | 39,760 | x                       | (1)        |
| <i>Equus</i> | <i>ferus</i> | IK01-150  | UAMES                   | 12014          | mandible          | CAMS-92081                     | 34,210                                 | 370                  | -21.20                         | 7.21                          | 34,210                                                      | 370                  | 37,825                   | 39,690 | x                       | (1)        |
| <i>Equus</i> | <i>ferus</i> | TIT10-37  | UAMES                   | 29488          | metacarpal        | Beta-331885 <sup>c</sup>       | 34,320                                 | 270                  | -20.90                         | 9.10                          | 34,320                                                      | 270                  | 38,321                   | 39,522 | x                       | (1)        |
| <i>Equus</i> | <i>ferus</i> | KIG05-2.2 | UAMES                   | 32769          | metacarpal        | Beta 369780 <sup>c</sup>       | 34,360                                 | 290                  | -20.90                         | n/a                           | 34,360                                                      | 290                  | 38,330                   | 39,605 | x                       | (1)        |
| <i>Equus</i> | <i>ferus</i> | IK99-404  | UAMES                   | 11122          | metacarpal        | CAMS-120681 <sup>c</sup>       | 34,690                                 | 340                  | -22.11                         | 8.30                          | 34,690                                                      | 340                  | 38,524                   | 39,999 | x                       | (1)        |
| <i>Equus</i> | <i>ferus</i> | TIT10-37  | UAMES                   | 29488          | metacarpal        | Beta-339247 <sup>c</sup>       | 34,780                                 | 290                  | -22.30                         | n/a                           | 34,780                                                      | 290                  | 38,652                   | 39,990 | x                       | this study |
| <i>Equus</i> | <i>ferus</i> | IK13-57   | UAMES                   | 32952          | cranium           | Beta-362042                    | 35,200                                 | 290                  | -20.40                         | 6.40                          | 35,200                                                      | 290                  | 39,021                   | 40,481 | x                       | this study |
| <i>Equus</i> | <i>ferus</i> | IK99-404  | UAMES                   | 11122          | metacarpal        | CAMS-121754 <sup>c</sup>       | 35,380                                 | 360                  | -22.10                         | 8.30                          | 35,380                                                      | 360                  | 39,105                   | 40,866 | x                       | (1)        |
| <i>Equus</i> | <i>ferus</i> | IK13-56   | UAMES                   | 32958          | metacarpal        | Beta-362041                    | 35,460                                 | 300                  | -21.00                         | 8.50                          | 35,460                                                      | 300                  | 39,339                   | 40,836 | x                       | this study |
| <i>Equus</i> | <i>ferus</i> | n/a       | n/a                     | n/a            | n.r. <sup>b</sup> | CAMS-91789                     | 35,500                                 | 400                  | n/a                            | n/a                           | 35,500                                                      | 400                  | 39,183                   | 41,077 | x                       | (5)        |
| <i>Equus</i> | <i>ferus</i> | IK98-0009 | UAMES                   | 9169           | mandible          | CAMS-91889                     | 35,600                                 | 400                  | -21.00                         | 5.93                          | 35,600                                                      | 400                  | 39,320                   | 41,177 | x                       | (1)        |
| <i>Equus</i> | <i>ferus</i> | T99-025   | UAMES                   | 8728           | metacarpal        | Beta 369777 <sup>c</sup>       | 35,850                                 | 390                  | -20.40                         | n/a                           | 35,850                                                      | 390                  | 39,650                   | 41,356 | x                       | (1)        |
| <i>Equus</i> | <i>ferus</i> | IK98-0394 | UAMES                   | 8814           | metacarpal        | CAMS-91791                     | 36,500                                 | 500                  | -21.40                         | 6.02                          | 36,500                                                      | 500                  | 40,137                   | 41,980 | x                       | (1)        |
| <i>Equus</i> | <i>ferus</i> | IK01-121  | UAMES                   | 11782          | metacarpal        | CAMS-92079                     | 37,400                                 | 540                  | -21.15                         | 6.75                          | 37,400                                                      | 540                  | 40,995                   | 42,645 | x                       | (1)        |
| <i>Equus</i> | <i>ferus</i> | T99-025   | UAMES                   | 8728           | metacarpal        | Beta 369784 <sup>c</sup>       | 37,490                                 | 390                  | -21.00                         | 4.40                          | 37,490                                                      | 390                  | 41,330                   | 42,478 | x                       | (1)        |

| Genus                      | species           | field ID | depository <sup>a</sup> | catalog number | skeletal element  | <sup>14</sup> Clab# and number | <sup>14</sup> C date reported (yrs BP) |                      | $\delta^{13}\text{C}$ ‰ (VPDB) | $\delta^{15}\text{N}$ ‰ (AIR) | $\delta^{13}\text{C}$ -normalized date used for calibration |                      | 95.4% calibrated range   |        | used in Monte Carlo (x) | source     |
|----------------------------|-------------------|----------|-------------------------|----------------|-------------------|--------------------------------|----------------------------------------|----------------------|--------------------------------|-------------------------------|-------------------------------------------------------------|----------------------|--------------------------|--------|-------------------------|------------|
|                            |                   |          |                         |                |                   |                                | <sup>14</sup> C date                   | std dev <sup>e</sup> |                                |                               | <sup>14</sup> C date                                        | std dev <sup>e</sup> | (cal yr BP) <sup>f</sup> |        |                         |            |
| <i>Equus</i>               | <i>ferus</i>      | IK99-806 | UAMES                   | 11068          | metacarpal        | CAMS-92075                     | 38,090                                 | 590                  | -20.84                         | 5.76                          | 38,090                                                      | 590                  | 41,503                   | 43,151 | x                       | (1)        |
| <i>Equus</i>               | <i>ferus</i>      | IK12-010 | UAMES                   | 29492          | metacarpal        | Beta-343825 <sup>c</sup>       | 38,790                                 | 440                  | -20.90                         | n/a                           | 38,790                                                      | 440                  | 42,129                   | 43,405 | x                       | this study |
| <i>Equus</i>               | <i>ferus</i>      | IK01-165 | UAMES                   | 11622          | metacarpal        | Beta 369783 <sup>c</sup>       | 38,850                                 | 450                  | -20.90                         | 3.70                          | 38,850                                                      | 450                  | 42,150                   | 43,484 | x                       | (1)        |
| <i>Equus</i>               | <i>ferus</i>      | IK08-078 | UAMES                   | 29490          | metacarpal        | Beta-339239 <sup>c</sup>       | 40,480                                 | 580                  | -20.80                         | n/a                           | 40,480                                                      | 580                  | 43,085                   | 45,135 | x                       | (1)        |
| <i>Equus</i>               | <i>ferus</i>      | IK08-079 | UAMES                   | 29489          | metacarpal        | Beta-331868 <sup>c</sup>       | 40,880                                 | 400                  | -21.20                         | 5.70                          | 40,880                                                      | 400                  | 43,602                   | 45,195 | x                       | (1)        |
| <i>Equus</i>               | <i>ferus</i>      | IK01-165 | UAMES                   | 11622          | metacarpal        | Beta 369778 <sup>c</sup>       | 40,930                                 | 560                  | -20.90                         | n/a                           | 40,930                                                      | 560                  | 43,415                   | 45,480 | x                       | (1)        |
| <i>Equus</i>               | <i>ferus</i>      | IK08-078 | UAMES                   | 29490          | metacarpal        | Beta-331867 <sup>c</sup>       | 40,960                                 | 370                  | -20.60                         | 7.00                          | 40,960                                                      | 370                  | 43,731                   | 45,222 | x                       | (1)        |
| <i>Equus</i>               | <i>ferus</i>      | IK99-111 | UAMES                   | 10544          | metacarpal        | CAMS-91799                     | 41,000                                 | 800                  | -20.79                         | 3.07                          | 41,000                                                      | 800                  | 43,160                   | 45,991 | x                       | (1)        |
| <i>Equus</i>               | <i>ferus</i>      | IK12-011 | UAMES                   | 29491          | metacarpal        | Beta-339253 <sup>c</sup>       | 41,090                                 | 560                  | -20.90                         | n/a                           | 41,090                                                      | 560                  | 43,546                   | 45,622 | x                       | this study |
| <i>Equus</i>               | <i>ferus</i>      | IK12-011 | UAMES                   | 29491          | metacarpal        | Beta-331876 <sup>c</sup>       | 41,410                                 | 570                  | -20.90                         | 4.20                          | 41,410                                                      | 570                  | 43,835                   | 45,930 | x                       | (1)        |
| <i>Equus</i>               | <i>ferus</i>      | IK13-58  | UAMES                   | 32951          | cranium           | Beta-362043                    | 41,830                                 | 630                  | -21.40                         | 6.70                          | 41,830                                                      | 630                  | 44,140                   | 46,459 | x                       | this study |
| <i>Equus</i>               | <i>ferus</i>      | IK12-010 | UAMES                   | 29492          | metacarpal        | Beta-331875 <sup>c</sup>       | 41,840                                 | 410                  | -20.40                         | 4.30                          | 41,840                                                      | 410                  | 44,495                   | 45,985 | x                       | (1)        |
| <i>Equus</i>               | <i>ferus</i>      | IK02-072 | UAMES                   | 10534          | metatarsal        | CAMS-120650 <sup>c</sup>       | 42,500                                 | 1,000                | -21.27                         | 7.70                          | 42,500                                                      | 1,000                | 44,189                   | 48,357 | x                       | (1)        |
| <i>Equus</i>               | <i>ferus</i>      | IK08-079 | UAMES                   | 29489          | metacarpal        | Beta-339240 <sup>c</sup>       | 42,540                                 | 660                  | -21.10                         | n/a                           | 42,540                                                      | 660                  | 44,690                   | 47,311 | x                       | this study |
| <i>Equus</i>               | <i>ferus</i>      | IK02-072 | UAMES                   | 10534          | metatarsal        | CAMS-121737 <sup>c</sup>       | 43,700                                 | 1,000                | -21.30                         | 7.70                          | 43,700                                                      | 1,000                | 45,330                   | 49,411 | x                       | (1)        |
| <i>Equus</i>               | <i>ferus</i>      | IK02-026 | UAMES                   | 10434          | mandible          | CAMS-91959                     | 46,770                                 | 1,710                | -20.70                         | 1.65                          | 46,770                                                      | 1,710                | 43,796                   | 51,544 |                         | (1)        |
| <i>Equus</i>               | <i>ferus</i>      | n/a      | n/a                     | n/a            | n.r. <sup>b</sup> | I-9319                         | >40,000 <sup>d</sup>                   |                      | -21.10*                        | n/a                           | >40,064                                                     |                      | n/a                      | n/a    |                         | (4)        |
| <i>Equus</i>               | <i>ferus</i>      | n/a      | n/a                     | n/a            | n.r. <sup>b</sup> | I-9320                         | >40,000 <sup>d</sup>                   |                      | -21.10*                        | n/a                           | >40,064                                                     |                      | n/a                      | n/a    |                         | (4)        |
| <i>Equus</i>               | <i>ferus</i>      | IK10-02  | UAMES                   | 29493          | cranium           | Beta-283243                    | >42,800                                |                      | -20.90                         | n/a                           | >42,800                                                     |                      | n/a                      | n/a    |                         | (1)        |
| <i>Equus</i>               | <i>ferus</i>      | KIK12-02 | UAMES                   | 29494          | phalange          | Beta-331880                    | >43,500                                |                      | -21.00                         | 5.70                          | >43,500                                                     |                      | n/a                      | n/a    |                         | (1)        |
| <i>Mammut</i> <sup>g</sup> | <i>americanum</i> | MAY12-45 | UAMES                   | 30200          | molar             | UCIAMS-117241                  | 47,000                                 | 2,300                | -20.94                         | 3.46                          | 47,000                                                      | 2,300                | 43,099                   | 54,886 |                         | (6)        |
| <i>Mammut</i>              | <i>americanum</i> | IK01-277 | UAMES                   | 12060          | molar             | UCIAMS-117236                  | 49,800                                 | 3,300                | -20.88                         | 3.05                          | 49,800                                                      | 3,300                | 44,822                   | 65,508 |                         | (6)        |
| <i>Mammut</i>              | <i>americanum</i> | MAY12-70 | n/a                     | n/a            | molar             | UCIAMS-117237                  | >46,100                                |                      | -21.13                         | 3.50                          | >46,100                                                     |                      | n/a                      | n/a    |                         | (6)        |
| <i>Mammut</i>              | <i>americanum</i> | KIG12-15 | UAMES                   | 30199          | molar             | UCIAMS-117235                  | >46,400                                |                      | -20.88                         | 3.16                          | >46,400                                                     |                      | n/a                      | n/a    |                         | (6)        |
| <i>Mammut</i>              | <i>americanum</i> | IK10-106 | UAMES                   | 30201          | molar             | UCIAMS-117232                  | >47,500                                |                      | -20.81                         | 3.01                          | >47,500                                                     |                      | n/a                      | n/a    |                         | (6)        |
| <i>Mammut</i>              | <i>americanum</i> | IK99-237 | UAMES                   | 2414           | molar             | UCIAMS-117234                  | >48,100                                |                      | -20.76                         | 4.08                          | >48,100                                                     |                      | n/a                      | n/a    |                         | (6)        |
| <i>Mammut</i>              | <i>americanum</i> | IK01-321 | UAMES                   | 12047          | molar             | UCIAMS-117240                  | >48,800                                |                      | -20.67                         | 3.54                          | >48,800                                                     |                      | n/a                      | n/a    |                         | (6)        |
| <i>Mammut</i>              | <i>americanum</i> | IK08-127 | UAMES                   | 30198          | molar             | UCIAMS-117243                  | >51,200                                |                      | -20.73                         | 2.98                          | >51,200                                                     |                      | n/a                      | n/a    |                         | (6)        |
| <i>Mammut</i>              | <i>americanum</i> | IK99-328 | UAMES                   | 11095          | molar             | UCIAMS-117233                  | >51,200                                |                      | -21.19                         | 3.08                          | >51,200                                                     |                      | n/a                      | n/a    |                         | (6)        |
| <i>Mammut</i>              | <i>americanum</i> | IK05-3.5 | UAMES                   | 30197          | molar             | UCIAMS-117242                  | >51,700                                |                      | -21.19                         | 2.80                          | >51,700                                                     |                      | n/a                      | n/a    |                         | (6)        |

| Genus                         | species            | field ID  | depository <sup>a</sup> | catalog number | skeletal element  | <sup>14</sup> Clab# and number | <sup>14</sup> C date reported (yrs BP) |                      | $\delta^{13}\text{C}$ ‰ (VPDB) | $\delta^{15}\text{N}$ ‰ (AIR) | $\delta^{13}\text{C}$ -normalized date used for calibration |                      | 95.4% calibrated range   |        | used in Monte Carlo (x) | source |
|-------------------------------|--------------------|-----------|-------------------------|----------------|-------------------|--------------------------------|----------------------------------------|----------------------|--------------------------------|-------------------------------|-------------------------------------------------------------|----------------------|--------------------------|--------|-------------------------|--------|
|                               |                    |           |                         |                |                   |                                | <sup>14</sup> C date                   | std dev <sup>e</sup> |                                |                               | <sup>14</sup> C date                                        | std dev <sup>e</sup> | (cal yr BP) <sup>f</sup> |        |                         |        |
| <i>Mammut</i>                 | <i>americanum</i>  | IK98-963  | UAMES                   | 9705           | molar             | UCIAMS-117239                  | >51,700                                |                      | -20.96                         | 2.77                          | >51,700                                                     |                      | n/a                      | n/a    |                         | (6)    |
| <i>Mammut</i>                 | <i>americanum</i>  | IK98-967  | n/a                     | n/a            | molar             | CAMS-91794                     | >54,000                                |                      | -20.99                         | n/a                           | >54,000                                                     |                      | n/a                      | n/a    |                         | (1)    |
| <i>Mammuthus</i> <sup>g</sup> | <i>primigenius</i> | UNM6648   | UAMES                   | 30202          | n.r. <sup>b</sup> | AA-26006                       | 11,910                                 | 130                  | -21.20                         | n/a                           | 11,910                                                      | 130                  | 13,470                   | 14,062 | x                       | (7)    |
| <i>Mammuthus</i>              | <i>primigenius</i> | IK24      | n/a                     | n/a            | n.r. <sup>b</sup> | AA-17614                       | 12,190                                 | 130                  | -21.84                         | n/a                           | 12,190                                                      | 130                  | 13,750                   | 14,707 | x                       | (7)    |
| <i>Mammuthus</i>              | <i>primigenius</i> | AK204-V-1 | UAMES                   | 28809          | n.r. <sup>b</sup> | AA-14954                       | 12,490                                 | 170                  | -21.10                         | n/a                           | 12,490                                                      | 170                  | 14,080                   | 15,250 | x                       | (7)    |
| <i>Mammuthus</i>              | <i>primigenius</i> | UNM11997  | n/a                     | n/a            | n.r. <sup>b</sup> | AA-26028                       | 13,290                                 | 140                  | -21.30                         | n/a                           | 13,290                                                      | 140                  | 15,534                   | 16,400 | x                       | (7)    |
| <i>Mammuthus</i>              | <i>primigenius</i> | KIK10- SK | UAMES                   | 29496          | cranium           | Beta-283246                    | 14,070                                 | 60                   | -19.60                         | n/a                           | 14,070                                                      | 60                   | 16,864                   | 17,380 | x                       | (1)    |
| <i>Mammuthus</i>              | <i>primigenius</i> | UMN6068c  | n/a                     | n/a            | n.r. <sup>b</sup> | AA-26015                       | 15,740                                 | 230                  | -22.80                         | n/a                           | 15,740                                                      | 230                  | 18,560                   | 19,584 | x                       | (7)    |
| <i>Mammuthus</i>              | <i>primigenius</i> | 49MIS117  | n/a                     | n/a            | n.r. <sup>b</sup> | Shell-6713A                    | 17,300 <sup>d</sup>                    | 800                  | -21.50*                        | n/a                           | 17,357                                                      | 800                  | 19,161                   | 23,040 | x                       | (8)    |
| <i>Mammuthus</i>              | <i>primigenius</i> | IK02-181  | UAMES                   | 10522          | fibula            | CAMS-120653 <sup>c</sup>       | 17,870                                 | 60                   | -20.90                         | 7.60                          | 17,870                                                      | 60                   | 21,435                   | 21,865 | x                       | (1)    |
| <i>Mammuthus</i>              | <i>primigenius</i> | IK02-181  | UAMES                   | 10522          | fibula            | CAMS-121739 <sup>c</sup>       | 17,965                                 | 50                   | -20.90                         | 7.60                          | 17,965                                                      | 50                   | 21,563                   | 21,945 | x                       | (1)    |
| <i>Mammuthus</i>              | <i>primigenius</i> | IK01-257  | UAMES                   | 12016          | molar             | CAMS-92087                     | 19,530                                 | 80                   | -21.34                         | 10.11                         | 19,530                                                      | 80                   | 23,210                   | 23,818 | x                       | (1)    |
| <i>Mammuthus</i>              | <i>primigenius</i> | IK13      | n/a                     | n/a            | n.r. <sup>b</sup> | AA-17620                       | 19,560                                 | 330                  | -21.17                         | n/a                           | 19,560                                                      | 330                  | 22,774                   | 24,352 | x                       | (7)    |
| <i>Mammuthus</i>              | <i>primigenius</i> | IK3       | n/a                     | n/a            | n.r. <sup>b</sup> | AA-17623                       | 19,970                                 | 350                  | -21.25                         | n/a                           | 19,970                                                      | 350                  | 23,191                   | 25,040 | x                       | (7)    |
| <i>Mammuthus</i>              | <i>primigenius</i> | HAR-057-1 | n/a                     | n/a            | femur             | Beta-192036                    | 20,150                                 | 110                  | -21.50                         | n/a                           | 20,150                                                      | 110                  | 23,934                   | 24,500 | x                       | (1)    |
| <i>Mammuthus</i>              | <i>primigenius</i> | UNM6068a  | n/a                     | n/a            | n.r. <sup>b</sup> | AA-26013                       | 24,193                                 | 510                  | -21.40                         | n/a                           | 24,193                                                      | 510                  | 27,476                   | 29,389 | x                       | (7)    |
| <i>Mammuthus</i>              | <i>primigenius</i> | IK98-0339 | UAMES                   | 9053           | scapula           | CAMS-120677 <sup>c</sup>       | 24,460                                 | 130                  | -21.49                         | 7.60                          | 24,460                                                      | 130                  | 28,166                   | 28,797 | x                       | (1)    |
| <i>Mammuthus</i>              | <i>primigenius</i> | IK98-0339 | UAMES                   | 9053           | scapula           | CAMS-121751 <sup>c</sup>       | 24,850                                 | 110                  | -21.50                         | 7.60                          | 24,850                                                      | 110                  | 28,594                   | 29,202 | x                       | (1)    |
| <i>Mammuthus</i>              | <i>primigenius</i> | T02-110   | n/a                     | n/a            | n.r. <sup>b</sup> | CAMS-91967                     | 26,410                                 | 150                  | -20.49                         | 8.03                          | 26,410                                                      | 150                  | 30,382                   | 30,995 | x                       | (1)    |
| <i>Mammuthus</i>              | <i>primigenius</i> | IK8       | n/a                     | n/a            | n.r. <sup>b</sup> | AA-17616 <sup>x</sup>          | 28,020                                 | 810                  | -21.61                         | n/a                           | 28,020                                                      | 810                  | 30,858                   | 33,854 | x                       | (7)    |
| <i>Mammuthus</i>              | <i>primigenius</i> | IK99-120b | UAMES                   | 10688          | mandible          | CAMS-91800                     | 28,200                                 | 200                  | -21.20                         | 7.86                          | 28,200                                                      | 200                  | 31,475                   | 32,730 | x                       | (1)    |
| <i>Mammuthus</i>              | <i>primigenius</i> | IK01-040  | UAMES                   | 11998          | radius            | CAMS-92077 <sup>c</sup>        | 28,220                                 | 210                  | -21.20                         | 7.56                          | 28,220                                                      | 210                  | 31,481                   | 32,775 | x                       | (1)    |
| <i>Mammuthus</i>              | <i>primigenius</i> | IK01-040  | UAMES                   | 11998          | radius            | CAMS-91783 <sup>c</sup>        | 29,100                                 | 200                  | -21.20                         | 7.56                          | 29,100                                                      | 200                  | 32,810                   | 33,762 | x                       | (1)    |
| <i>Mammuthus</i>              | <i>primigenius</i> | IK98-0063 | UAMES                   | 9096           | tibia             | CAMS-120654 <sup>c</sup>       | 29,250                                 | 200                  | -21.08                         | 8.30                          | 29,250                                                      | 200                  | 32,966                   | 33,866 | x                       | (1)    |
| <i>Mammuthus</i>              | <i>primigenius</i> | IK99-495  | UAMES                   | 10851          | mandible          | CAMS-120684                    | 29,740                                 | 190                  | -21.20                         | 7.97                          | 29,740                                                      | 190                  | 33,559                   | 34,214 | x                       | (1)    |
| <i>Mammuthus</i>              | <i>primigenius</i> | IK98-0063 | UAMES                   | 9096           | tibia             | CAMS-121740 <sup>c</sup>       | 30,730                                 | 200                  | -21.10                         | 8.30                          | 30,730                                                      | 200                  | 34,232                   | 35,055 | x                       | (1)    |
| <i>Mammuthus</i>              | <i>primigenius</i> | IK99-745  | UAMES                   | 10905          | molar             | CAMS-92072                     | 30,990                                 | 250                  | -20.58                         | 9.03                          | 30,990                                                      | 250                  | 34,422                   | 35,482 | x                       | (1)    |
| <i>Mammuthus</i>              | <i>primigenius</i> | AK323-V-1 | UAMES                   | 29130          | n.r. <sup>b</sup> | AA-22574                       | 31,100                                 | 1,200                | -21.80                         | n/a                           | 31,100                                                      | 1,200                | 33,069                   | 38,628 | x                       | (7)    |
| <i>Mammuthus</i>              | <i>primigenius</i> | IK35      | n/a                     | n/a            | n.r. <sup>b</sup> | AA-17602                       | 31,300                                 | 1,200                | -21.04                         | n/a                           | 31,300                                                      | 1,200                | 33,365                   | 38,815 | x                       | (7)    |
| <i>Mammuthus</i>              | <i>primigenius</i> | UMN6068b  | n/a                     | n/a            | n.r. <sup>b</sup> | AA-26014                       | 31,600                                 | 1,200                | -21.40                         | n/a                           | 31,600                                                      | 1,200                | 33,663                   | 39,014 | x                       | (7)    |

| Genus            | species            | field ID  | depository <sup>a</sup> | catalog number | skeletal element  | <sup>14</sup> CLab# and number | <sup>14</sup> C date reported (yrs BP) |                      | $\delta^{13}\text{C}$ ‰ (VPDB) | $\delta^{15}\text{N}$ ‰ (AIR) | $\delta^{13}\text{C}$ -normalized date used for calibration |                      | 95.4% calibrated range   |        | used in Monte Carlo (x) | source |
|------------------|--------------------|-----------|-------------------------|----------------|-------------------|--------------------------------|----------------------------------------|----------------------|--------------------------------|-------------------------------|-------------------------------------------------------------|----------------------|--------------------------|--------|-------------------------|--------|
|                  |                    |           |                         |                |                   |                                | <sup>14</sup> C date                   | std dev <sup>e</sup> |                                |                               | <sup>14</sup> C date                                        | std dev <sup>e</sup> | (cal yr BP) <sup>f</sup> |        |                         |        |
| <i>Mammuthus</i> | <i>primigenius</i> | IK99-5001 | UAMES                   | 8632           | tusk              | CAMS-91779 <sup>c</sup>        | 33,000                                 | 300                  | -20.77                         | 7.16                          | 33,000                                                      | 300                  | 36,329                   | 38,172 | x                       | (1)    |
| <i>Mammuthus</i> | <i>primigenius</i> | AK268-V-1 | UAMES                   | 28766          | n.r. <sup>b</sup> | AA-22575                       | 33,300                                 | 1,600                | n/a                            | n/a                           | 33,300                                                      | 1,600                | 34,672                   | 41,645 | x                       | (7)    |
| <i>Mammuthus</i> | <i>primigenius</i> | T02-032   | UAMES                   | 8635           | femur             | CAMS-121756 <sup>c</sup>       | 33,340                                 | 280                  | -20.90                         | n/a                           | 33,340                                                      | 280                  | 36,709                   | 38,439 | x                       | (1)    |
| <i>Mammuthus</i> | <i>primigenius</i> | T02-032   | UAMES                   | 8635           | femur             | CAMS-120705 <sup>c</sup>       | 33,370                                 | 290                  | -20.90                         | n/a                           | 33,370                                                      | 290                  | 36,722                   | 38,473 | x                       | (1)    |
| <i>Mammuthus</i> | <i>primigenius</i> | IK99-575  | UAMES                   | 11028          | molar             | CAMS-91812 <sup>c</sup>        | 33,400                                 | 300                  | -20.75                         | 9.12                          | 33,400                                                      | 300                  | 36,732                   | 38,509 | x                       | (1)    |
| <i>Mammuthus</i> | <i>primigenius</i> | IK14      | n/a                     | n/a            | n.r. <sup>b</sup> | AA-17619                       | 33,400                                 | 1,600                | -26.60                         | n/a                           | 33,400                                                      | 1,600                | 34,745                   | 41,705 | x                       | (7)    |
| <i>Mammuthus</i> | <i>primigenius</i> | IK99-5001 | UAMES                   | 8632           | tusk              | CAMS-91968 <sup>c</sup>        | 33,530                                 | 340                  | -20.77                         | 7.16                          | 33,530                                                      | 340                  | 36,777                   | 38,680 | x                       | (1)    |
| <i>Mammuthus</i> | <i>primigenius</i> | IK99-575  | UAMES                   | 11028          | molar             | CAMS-91780 <sup>c</sup>        | 33,600                                 | 400                  | -20.75                         | 9.12                          | 33,600                                                      | 400                  | 36,701                   | 38,866 | x                       | (1)    |
| <i>Mammuthus</i> | <i>primigenius</i> | T02-033   | n/a                     | n/a            | n.r. <sup>b</sup> | CAMS-120706 <sup>c</sup>       | 33,880                                 | 300                  | -21.40                         | 7.00                          | 33,880                                                      | 300                  | 37,344                   | 39,070 | x                       | (1)    |
| <i>Mammuthus</i> | <i>primigenius</i> | T02-033   | n/a                     | n/a            | n.r. <sup>b</sup> | CAMS-121757 <sup>c</sup>       | 33,920                                 | 310                  | -21.40                         | 7.00                          | 33,920                                                      | 310                  | 37,384                   | 39,162 | x                       | (1)    |
| <i>Mammuthus</i> | <i>primigenius</i> | 49IKR-VP  | n/a                     | n/a            | n.r. <sup>b</sup> | USGS-807                       | 36,400                                 | 560                  | -21.80                         | n/a                           | 36,400                                                      | 560                  | 39,928                   | 41,994 | x                       | (2)    |
| <i>Mammuthus</i> | <i>primigenius</i> | IK4       | n/a                     | n/a            | n.r. <sup>b</sup> | AA-17627                       | 36,700                                 | 2,300                | -21.98                         | n/a                           | 36,700                                                      | 2,300                | 36,771                   | 47,391 | x                       | (7)    |
| <i>Mammuthus</i> | <i>primigenius</i> | IK17      | n/a                     | n/a            | n.r. <sup>b</sup> | AA-17616 <sup>x</sup>          | 36,800                                 | 2,500                | -22.98                         | n/a                           | 36,800                                                      | 2,500                | 36,759                   | 48,085 | x                       | (7)    |
| <i>Mammuthus</i> | <i>primigenius</i> | AK1014    | n/a                     | n/a            | n.r. <sup>b</sup> | AA-22615                       | 37,400                                 | 2,600                | -18.80                         | n/a                           | 37,400                                                      | 2,600                | 37,905                   | 49,029 | x                       | (7)    |
| <i>Mammuthus</i> | <i>primigenius</i> | IK10      | n/a                     | n/a            | n.r. <sup>b</sup> | AA-17622                       | 37,800                                 | 2,700                | -22.51                         | n/a                           | 37,800                                                      | 2,700                | 38,434                   | 49,274 | x                       | (7)    |
| <i>Mammuthus</i> | <i>primigenius</i> | IK33      | n/a                     | n/a            | n.r. <sup>b</sup> | AA-17605                       | 38,000                                 | 2,700                | -21.72                         | n/a                           | 38,000                                                      | 2,700                | 38,609                   | 49,237 | x                       | (7)    |
| <i>Mammuthus</i> | <i>primigenius</i> | IK6       | n/a                     | n/a            | n.r. <sup>b</sup> | AA-17628                       | 39,700                                 | 3,400                | -23.05                         | n/a                           | 39,700                                                      | 3,400                | 40,291                   | ...    | x                       | (7)    |
| <i>Mammuthus</i> | <i>primigenius</i> | IK25      | n/a                     | n/a            | n.r. <sup>b</sup> | AA-17615                       | 39,800                                 | 3,400                | -21.05                         | n/a                           | 39,800                                                      | 3,400                | 40,397                   | ...    | x                       | (7)    |
| <i>Mammuthus</i> | <i>primigenius</i> | IK98-1275 | UAMES                   | 10080          | humerus           | CAMS-120670                    | 40,760                                 | 830                  | -21.80                         | 7.09                          | 40,760                                                      | 830                  | 42,980                   | 45,840 | x                       | (1)    |
| <i>Mammuthus</i> | <i>primigenius</i> | IK99-235  | UAMES                   | 10752          | molar             | CAMS-91803                     | 40,870                                 | 820                  | -21.53                         | 8.44                          | 40,870                                                      | 820                  | 43,057                   | 45,917 | x                       | (1)    |
| <i>Mammuthus</i> | <i>primigenius</i> | IK98-1102 | UAMES                   | 9823           | vertebra          | CAMS-120666 <sup>c</sup>       | 45,100                                 | 1,400                | -21.42                         | 7.80                          | 45,100                                                      | 1,400                | 46,299                   | ...    | x                       | (1)    |
| <i>Mammuthus</i> | <i>primigenius</i> | IK98-1102 | UAMES                   | 9823           | vertebra          | CAMS-121748 <sup>c</sup>       | 46,900                                 | 1,400                | -21.40                         | 7.80                          | 46,900                                                      | 1,400                | 44,430                   | 50,485 |                         | (1)    |
| <i>Mammuthus</i> | <i>primigenius</i> | IK01-250  | UAMES                   | 11964          | tibia             | CAMS-120643 <sup>c</sup>       | 47,300                                 | 1,500                | -21.49                         | 6.68                          | 47,300                                                      | 1,500                | 44,667                   | 51,243 |                         | (1)    |
| <i>Mammuthus</i> | <i>primigenius</i> | IK98-1013 | UAMES                   | 9934           | scapula           | CAMS-120722 <sup>c</sup>       | 47,300                                 | 1,800                | -21.82                         | 7.35                          | 47,300                                                      | 1,800                | 44,181                   | 52,468 |                         | (1)    |
| <i>Mammuthus</i> | <i>primigenius</i> | IK01-201  | UAMES                   | 11715          | molar             | CAMS-92085                     | 48,040                                 | 2,000                | -21.39                         | 8.17                          | 48,040                                                      | 2,000                | 44,601                   | 54,181 |                         | (1)    |
| <i>Mammuthus</i> | <i>primigenius</i> | IK01-250  | UAMES                   | 11964          | tibia             | CAMS-120718 <sup>c</sup>       | 48,760                                 | 2,200                | -21.49                         | 6.68                          | 48,760                                                      | 2,200                | 45,010                   | 56,022 |                         | (1)    |
| <i>Mammuthus</i> | <i>primigenius</i> | IK01-291  | n/a                     | n/a            | tusk              | CAMS-120645 <sup>c</sup>       | 48,900                                 | 1,900                | -21.22                         | 8.24                          | 48,900                                                      | 1,900                | 45,621                   | 54,536 |                         | (1)    |
| <i>Mammuthus</i> | <i>primigenius</i> | IK01-166  | UAMES                   | 11821          | ulna              | CAMS-120716                    | 49,310                                 | 1,950                | -20.85                         | 6.55                          | 49,310                                                      | 1,950                | 45,950                   | 55,195 |                         | (1)    |
| <i>Mammuthus</i> | <i>primigenius</i> | IK01-355  | UAMES                   | 12004          | vertebra          | CAMS-120648 <sup>c</sup>       | 49,400                                 | 2,400                | -21.66                         | n/a                           | 49,400                                                      | 2,400                | 45,353                   | 57,952 |                         | (1)    |
| <i>Mammuthus</i> | <i>primigenius</i> | IK01-147  | UAMES                   | 12001          | femur             | CAMS-92080                     | 49,490                                 | 2,400                | -21.32                         | n/a                           | 49,490                                                      | 2,400                | 45,443                   | 58,042 |                         | (1)    |

| Genus            | species            | field ID  | depository <sup>a</sup> | catalog number | skeletal element  | <sup>14</sup> CLab# and number | <sup>14</sup> C date reported (yrs BP) |                      | $\delta^{13}\text{C}$ ‰ (VPDB) | $\delta^{15}\text{N}$ ‰ (AIR) | $\delta^{13}\text{C}$ -normalized date used for calibration |                      | 95.4% calibrated range   |        | used in Monte Carlo (x) | source |
|------------------|--------------------|-----------|-------------------------|----------------|-------------------|--------------------------------|----------------------------------------|----------------------|--------------------------------|-------------------------------|-------------------------------------------------------------|----------------------|--------------------------|--------|-------------------------|--------|
|                  |                    |           |                         |                |                   |                                | <sup>14</sup> C date                   | std dev <sup>e</sup> |                                |                               | <sup>14</sup> C date                                        | std dev <sup>e</sup> | (cal yr BP) <sup>f</sup> |        |                         |        |
| <i>Mammuthus</i> | <i>primigenius</i> | IK98-1033 | UAMES                   | 9970           | scapula           | CAMS-120665                    | 49,700                                 | 2,500                | -21.43                         | 7.42                          | 49,700                                                      | 2,500                | 45,513                   | 58,957 |                         | (1)    |
| <i>Mammuthus</i> | <i>primigenius</i> | IK98-1195 | UAMES                   | 9811           | radius            | CAMS-120667c                   | 50,400                                 | 2,700                | -21.09                         | 6.08                          | 50,400                                                      | 2,700                | 45,958                   | 61,173 |                         | (1)    |
| <i>Mammuthus</i> | <i>primigenius</i> | IK98-1012 | UAMES                   | 9933           | cranium           | CAMS-120664                    | 50,800                                 | 2,400                | -21.39                         | 7.07                          | 50,800                                                      | 2,400                | 46,753                   | 59,352 |                         | (1)    |
| <i>Mammuthus</i> | <i>primigenius</i> | IK01-291  | n/a                     | n/a            | tusk              | CAMS-121732 <sup>c</sup>       | 51,000                                 | 2,400                | -21.20                         | 8.24                          | 51,000                                                      | 2,400                | 46,953                   | 59,552 |                         | (1)    |
| <i>Mammuthus</i> | <i>primigenius</i> | IK99-524  | UAMES                   | 11007          | molar             | CAMS-91811                     | 51,000                                 | 2,900                | -21.78                         | 9.68                          | 51,000                                                      | 2,900                | 46,341                   | 63,391 |                         | (1)    |
| <i>Mammuthus</i> | <i>primigenius</i> | IK98-1243 | UAMES                   | 9945           | radius            | CAMS-121750 <sup>c</sup>       | 51,800                                 | 2,700                | -21.70                         | 6.81                          | 51,800                                                      | 2,700                | 47,358                   | 62,573 |                         | (1)    |
| <i>Mammuthus</i> | <i>primigenius</i> | IK02-173  | UAMES                   | 10458          | fibula            | CAMS-91963                     | 51,900                                 | 3,200                | -21.33                         | 6.38                          | 51,900                                                      | 3,200                | 46,988                   | 66,781 |                         | (1)    |
| <i>Mammuthus</i> | <i>primigenius</i> | IK99-070  | UAMES                   | 10694          | mandible          | CAMS-91778 <sup>c</sup>        | 51,900                                 | 3,200                | -22.32                         | 9.48                          | 51,900                                                      | 3,200                | 46,988                   | 66,781 |                         | (1)    |
| <i>Mammuthus</i> | <i>primigenius</i> | IK01-355  | UAMES                   | 12004          | vertebra          | CAMS-121735 <sup>c</sup>       | 52,800                                 | 3,000                | -21.70                         | n/a                           | 52,800                                                      | 3,000                | 48,047                   | 66,018 |                         | (1)    |
| <i>Mammuthus</i> | <i>primigenius</i> | IK01-274  | n/a                     | n/a            | femur             | CAMS-92088                     | 53,000                                 | 3,700                | -21.42                         | 9.84                          | 53,000                                                      | 3,700                | 47,823                   | 71,903 |                         | (1)    |
| <i>Mammuthus</i> | <i>primigenius</i> | IK98-1243 | UAMES                   | 9945           | radius            | CAMS-120668 <sup>c</sup>       | 53,400                                 | 3,900                | -21.72                         | 6.81                          | 53,400                                                      | 3,900                | 48,154                   | 73,826 |                         | (1)    |
| <i>Mammuthus</i> | <i>primigenius</i> | IK01-170  | UAMES                   | 11824          | molar             | CAMS-92082                     | 53,600                                 | 3,900                | -21.82                         | n/a                           | 53,600                                                      | 3,900                | 48,354                   | 74,026 |                         | (1)    |
| <i>Mammuthus</i> | <i>primigenius</i> | IK98-1013 | UAMES                   | 9934           | scapula           | CAMS-121747 <sup>c</sup>       | 55,700                                 | 4,300                | -21.80                         | 7.35                          | 55,700                                                      | 4,300                | 50,355                   | 79,040 |                         | (1)    |
| <i>Mammuthus</i> | <i>primigenius</i> | IK27      | n/a                     | n/a            | n.r. <sup>b</sup> | AA-17610                       | >31,000                                |                      | -21.00                         | n/a                           | >31,000                                                     |                      | n/a                      | n/a    |                         | (7)    |
| <i>Mammuthus</i> | <i>primigenius</i> | n/a       | n/a                     | n/a            | n.r. <sup>b</sup> | I-9342                         | >35,000 <sup>d</sup>                   |                      | -21.50*                        | n/a                           | >35,057                                                     |                      | n/a                      | n/a    |                         | (9)    |
| <i>Mammuthus</i> | <i>primigenius</i> | IK16      | n/a                     | n/a            | n.r. <sup>b</sup> | AA-17612                       | >35,700                                |                      | -20.50                         | n/a                           | >35,700                                                     |                      | n/a                      | n/a    |                         | (7)    |
| <i>Mammuthus</i> | <i>primigenius</i> | IK23      | n/a                     | n/a            | n.r. <sup>b</sup> | AA-17626                       | >36,800                                |                      | -21.21                         | n/a                           | >36,800                                                     |                      | n/a                      | n/a    |                         | (7)    |
| <i>Mammuthus</i> | <i>primigenius</i> | IK31      | n/a                     | n/a            | n.r. <sup>b</sup> | AA-17603                       | >37,000                                |                      | -22.71                         | n/a                           | >37,000                                                     |                      | n/a                      | n/a    |                         | (7)    |
| <i>Mammuthus</i> | <i>primigenius</i> | IK22      | n/a                     | n/a            | n.r. <sup>b</sup> | AA-17613                       | >37,200                                |                      | -21.60                         | n/a                           | >37,200                                                     |                      | n/a                      | n/a    |                         | (7)    |
| <i>Mammuthus</i> | <i>primigenius</i> | IK29      | n/a                     | n/a            | n.r. <sup>b</sup> | AA-17611                       | >37,500                                |                      | -22.69                         | n/a                           | >37,500                                                     |                      | n/a                      | n/a    |                         | (7)    |
| <i>Mammuthus</i> | <i>primigenius</i> | IK15      | n/a                     | n/a            | n.r. <sup>b</sup> | AA-17617                       | >37,600                                |                      | -22.07                         | n/a                           | >37,600                                                     |                      | n/a                      | n/a    |                         | (7)    |
| <i>Mammuthus</i> | <i>primigenius</i> | IK36      | n/a                     | n/a            | n.r. <sup>b</sup> | AA-17604                       | >37,600                                |                      | -21.89                         | n/a                           | >37,600                                                     |                      | n/a                      | n/a    |                         | (7)    |
| <i>Mammuthus</i> | <i>primigenius</i> | IK32      | n/a                     | n/a            | n.r. <sup>b</sup> | AA-17609                       | >38,100                                |                      | -20.76                         | n/a                           | >38,100                                                     |                      | n/a                      | n/a    |                         | (7)    |
| <i>Mammuthus</i> | <i>primigenius</i> | IK26      | n/a                     | n/a            | n.r. <sup>b</sup> | AA-17608                       | >39,000                                |                      | -21.78                         | n/a                           | >39,000                                                     |                      | n/a                      | n/a    |                         | (7)    |
| <i>Mammuthus</i> | <i>primigenius</i> | AK72-4    | UAMES                   | 28848          | n.r. <sup>b</sup> | AA-14959 <sup>x</sup>          | >39,400                                |                      | -21.70                         | n/a                           | >39,400                                                     |                      | n/a                      | n/a    |                         | (7)    |
| <i>Mammuthus</i> | <i>primigenius</i> | IK34      | n/a                     | n/a            | n.r. <sup>b</sup> | AA-17607                       | >39,500                                |                      | -22.02                         | n/a                           | >39,500                                                     |                      | n/a                      | n/a    |                         | (7)    |
| <i>Mammuthus</i> | <i>primigenius</i> | IK30      | n/a                     | n/a            | n.r. <sup>b</sup> | AA-17606                       | >40,000                                |                      | -21.85                         | n/a                           | >40,000                                                     |                      | n/a                      | n/a    |                         | (7)    |
| <i>Mammuthus</i> | <i>primigenius</i> | AKV-72-5  | UAMES                   | 29356          | n.r. <sup>b</sup> | AA-14961                       | >40,700                                |                      | -22.00                         | n/a                           | >40,700                                                     |                      | n/a                      | n/a    |                         | (7)    |
| <i>Mammuthus</i> | <i>primigenius</i> | Tusk      | n/a                     | n/a            | tusk              | AA-22617                       | >40,800                                |                      | -21.90                         | n/a                           | >40,800                                                     |                      | n/a                      | n/a    |                         | (7)    |
| <i>Mammuthus</i> | <i>primigenius</i> | IK5       | n/a                     | n/a            | n.r. <sup>b</sup> | AA-17625                       | >41,000                                |                      | -21.98                         | n/a                           | >41,000                                                     |                      | n/a                      | n/a    |                         | (7)    |

| Genus            | species            | field ID    | depository <sup>a</sup> | catalog number | skeletal element  | <sup>14</sup> Clab# and number | <sup>14</sup> C date reported (yrs BP) |                      | $\delta^{13}\text{C}$ ‰ (VPDB) | $\delta^{15}\text{N}$ ‰ (AIR) | $\delta^{13}\text{C}$ -normalized date used for calibration |                      | 95.4% calibrated range   |     | used in Monte Carlo (x) | source |
|------------------|--------------------|-------------|-------------------------|----------------|-------------------|--------------------------------|----------------------------------------|----------------------|--------------------------------|-------------------------------|-------------------------------------------------------------|----------------------|--------------------------|-----|-------------------------|--------|
|                  |                    |             |                         |                |                   |                                | <sup>14</sup> C date                   | std dev <sup>e</sup> |                                |                               | <sup>14</sup> C date                                        | std dev <sup>e</sup> | (cal yr BP) <sup>f</sup> |     |                         |        |
| <i>Mammuthus</i> | <i>primigenius</i> | V-30-76     | UAMES                   | 23334          | molar             | AA-22620                       | >41,000                                |                      | -21.80                         | n/a                           | >41,000                                                     |                      | n/a                      | n/a |                         | (7)    |
| <i>Mammuthus</i> | <i>primigenius</i> | A-5         | n/a                     | n/a            | n.r. <sup>b</sup> | AA-14953                       | >41,100                                |                      | -22.30                         | n/a                           | >41,100                                                     |                      | n/a                      | n/a |                         | (7)    |
| <i>Mammuthus</i> | <i>primigenius</i> | AK119-V-1   | UAMES                   | 28789          | n.r. <sup>b</sup> | AA-14959 <sup>g</sup>          | >41,100                                |                      | -21.80                         | n/a                           | >41,100                                                     |                      | n/a                      | n/a |                         | (7)    |
| <i>Mammuthus</i> | <i>primigenius</i> | IK1         | n/a                     | n/a            | n.r. <sup>b</sup> | AA-17621                       | >41,100                                |                      | -22.33                         | n/a                           | >41,100                                                     |                      | n/a                      | n/a |                         | (7)    |
| <i>Mammuthus</i> | <i>primigenius</i> | IK2         | n/a                     | n/a            | n.r. <sup>b</sup> | AA-17624                       | >41,100                                |                      | -22.62                         | n/a                           | >41,100                                                     |                      | n/a                      | n/a |                         | (7)    |
| <i>Mammuthus</i> | <i>primigenius</i> | IK7         | n/a                     | n/a            | n.r. <sup>b</sup> | AA-17618                       | >41,100                                |                      | -22.41                         | n/a                           | >41,100                                                     |                      | n/a                      | n/a |                         | (7)    |
| <i>Mammuthus</i> | <i>primigenius</i> | My Ikpikpu, | n/a                     | n/a            | n.r. <sup>b</sup> | AA-14946                       | >41,100                                |                      | -20.90                         | n/a                           | >41,100                                                     |                      | n/a                      | n/a |                         | (7)    |
| <i>Mammuthus</i> | <i>primigenius</i> | IK09-07     | n/a                     | n/a            | tusk              | Beta-263032                    | >42,000                                |                      | -21.20                         | n/a                           | >42,000                                                     |                      | n/a                      | n/a |                         | (1)    |
| <i>Mammuthus</i> | <i>primigenius</i> | IK98-CWB    | n/a                     | n/a            | tusk              | Beta-283241                    | >43,500                                |                      | -20.90                         | n/a                           | >43,500                                                     |                      | n/a                      | n/a |                         | (1)    |
| <i>Mammuthus</i> | <i>primigenius</i> | KIK10-TT    | n/a                     | n/a            | tusk              | Beta-283247                    | >43,500                                |                      | -20.60                         | n/a                           | >43,500                                                     |                      | n/a                      | n/a |                         | (1)    |
| <i>Mammuthus</i> | <i>primigenius</i> | Pelvis      | n/a                     | n/a            | pelvis            | Beta-111034                    | >46,450                                |                      | -21.60                         | n/a                           | >46,450                                                     |                      | n/a                      | n/a |                         | (1)    |
| <i>Mammuthus</i> | <i>primigenius</i> | IK98-0957   | n/a                     | n/a            | long bone         | CAMS-120662                    | >48,900                                |                      | -20.74                         | 8.06                          | >48,900                                                     |                      | n/a                      | n/a |                         | (1)    |
| <i>Mammuthus</i> | <i>primigenius</i> | IK99-070    | UAMES                   | 10694          | mandible          | CAMS-91798 <sup>c</sup>        | >49,000                                |                      | -22.32                         | 9.48                          | >49,000                                                     |                      | n/a                      | n/a |                         | (1)    |
| <i>Mammuthus</i> | <i>primigenius</i> | IK99-236    | UAMES                   | 11111          | molar             | CAMS-91804                     | >49,000                                |                      | -21.84                         | 8.10                          | >49,000                                                     |                      | n/a                      | n/a |                         | (1)    |
| <i>Mammuthus</i> | <i>primigenius</i> | IK01-079    | UAMES                   | 11646          | rib               | CAMS-120638 <sup>c</sup>       | >49,100                                |                      | -23.18                         | 8.36                          | >49,100                                                     |                      | n/a                      | n/a |                         | (1)    |
| <i>Mammuthus</i> | <i>primigenius</i> | IK01-132    | UAMES                   | 12035          | radius            | CAMS-120640 <sup>c</sup>       | >49,100                                |                      | -21.46                         | 6.64                          | >49,100                                                     |                      | n/a                      | n/a |                         | (1)    |
| <i>Mammuthus</i> | <i>primigenius</i> | IK01-256    | UAMES                   | 11972          | molar             | CAMS-92086                     | >49,200                                |                      | -21.36                         | 8.18                          | >49,200                                                     |                      | n/a                      | n/a |                         | (1)    |
| <i>Mammuthus</i> | <i>primigenius</i> | T02-038     | UAMES                   | 8617           | scapula           | CAMS-91960                     | >49,200                                |                      | -22.44                         | 6.64                          | >49,200                                                     |                      | n/a                      | n/a |                         | (1)    |
| <i>Mammuthus</i> | <i>primigenius</i> | IK02-121    | UAMES                   | 10523          | radius            | CAMS-120652                    | >49,300                                |                      | -21.85                         | n/a                           | >49,300                                                     |                      | n/a                      | n/a |                         | (1)    |
| <i>Mammuthus</i> | <i>primigenius</i> | IK01-200    | UAMES                   | 11684          | molar             | CAMS-92084                     | >50,000                                |                      | -22.29                         | n/a                           | >50,000                                                     |                      | n/a                      | n/a |                         | (1)    |
| <i>Mammuthus</i> | <i>primigenius</i> | IK01-255    | UAMES                   | 11971          | femur             | CAMS-120644 <sup>c</sup>       | >50,000                                |                      | -21.98                         | 7.67                          | >50,000                                                     |                      | n/a                      | n/a |                         | (1)    |
| <i>Mammuthus</i> | <i>primigenius</i> | IK98-1312   | UAMES                   | 9853           | femur             | CAMS-120672                    | >50,100                                |                      | -22.04                         | 6.86                          | >50,100                                                     |                      | n/a                      | n/a |                         | (1)    |
| <i>Mammuthus</i> | <i>primigenius</i> | IK99-588    | UAMES                   | 10941          | pelvis            | CAMS-120723                    | >50,400                                |                      | -22.03                         | n/a                           | >50,400                                                     |                      | n/a                      | n/a |                         | (1)    |
| <i>Mammuthus</i> | <i>primigenius</i> | IK98-0298   | UAMES                   | 8889           | radius            | CAMS-120657                    | >50,600                                |                      | -22.09                         | 7.80                          | >50,600                                                     |                      | n/a                      | n/a |                         | (1)    |
| <i>Mammuthus</i> | <i>primigenius</i> | IK01-082    | n/a                     | n/a            | tibia             | CAMS-120639 <sup>c</sup>       | >51,000                                |                      | -20.80                         | 5.07                          | >51,000                                                     |                      | n/a                      | n/a |                         | (1)    |
| <i>Mammuthus</i> | <i>primigenius</i> | IK99-366    | UAMES                   | 11180          | tusk              | CAMS-120678                    | >51,000                                |                      | -21.59                         | 8.50                          | >51,000                                                     |                      | n/a                      | n/a |                         | (1)    |
| <i>Mammuthus</i> | <i>primigenius</i> | IK98-1281   | UAMES                   | 9996           | tibia             | CAMS-120671                    | >51,100                                |                      | -21.42                         | 7.19                          | >51,100                                                     |                      | n/a                      | n/a |                         | (1)    |
| <i>Mammuthus</i> | <i>primigenius</i> | IK98-1000   | UAMES                   | 9773           | tusk              | CAMS-120663                    | >51,300                                |                      | -21.58                         | 7.63                          | >51,300                                                     |                      | n/a                      | n/a |                         | (1)    |
| <i>Mammuthus</i> | <i>primigenius</i> | IK98-1274   | UAMES                   | 10079          | radius            | CAMS-120669                    | >51,300                                |                      | -21.72                         | 7.18                          | >51,300                                                     |                      | n/a                      | n/a |                         | (1)    |
| <i>Mammuthus</i> | <i>primigenius</i> | IK99-130    | UAMES                   | 11120          | femur             | CAMS-120674                    | >51,500                                |                      | -21.35                         | 6.77                          | >51,500                                                     |                      | n/a                      | n/a |                         | (1)    |

| Genus                      | species            | field ID    | depository <sup>a</sup> | catalog number | skeletal element | <sup>14</sup> CLab# and number | <sup>14</sup> C date reported (yrs BP) |                      | $\delta^{13}\text{C}$ ‰ (VPDB) | $\delta^{15}\text{N}$ ‰ (AIR) | $\delta^{13}\text{C}$ -normalized date used for calibration |                      | 95.4% calibrated range   |        | used in Monte Carlo (x) | source |
|----------------------------|--------------------|-------------|-------------------------|----------------|------------------|--------------------------------|----------------------------------------|----------------------|--------------------------------|-------------------------------|-------------------------------------------------------------|----------------------|--------------------------|--------|-------------------------|--------|
|                            |                    |             |                         |                |                  |                                | <sup>14</sup> C date                   | std dev <sup>e</sup> |                                |                               | <sup>14</sup> C date                                        | std dev <sup>e</sup> | (cal yr BP) <sup>f</sup> |        |                         |        |
| <i>Mammuthus</i>           | <i>primigenius</i> | IK01-079    | UAMES                   | 11646          | rib              | CAMS-120713 <sup>c</sup>       | >52,000                                |                      | -23.18                         | 8.36                          | >52,000                                                     |                      | n/a                      | n/a    |                         | (1)    |
| <i>Mammuthus</i>           | <i>primigenius</i> | IK99-322    | UAMES                   | 10561          | molar            | CAMS-91807                     | >52,000                                |                      | -21.88                         | 9.35                          | >52,000                                                     |                      | n/a                      | n/a    |                         | (1)    |
| <i>Mammuthus</i>           | <i>primigenius</i> | IK01-255    | UAMES                   | 11971          | femur            | CAMS-120719 <sup>c</sup>       | >52,100                                |                      | -21.98                         | 7.67                          | >52,100                                                     |                      | n/a                      | n/a    |                         | (1)    |
| <i>Mammuthus</i>           | <i>primigenius</i> | IK98-0759   | UAMES                   | 9541           | scapula          | CAMS-121743                    | >52,200                                |                      | -21.20                         | 9.31                          | >52,200                                                     |                      | n/a                      | n/a    |                         | (1)    |
| <i>Mammuthus</i>           | <i>primigenius</i> | IK99-5000b  | UAMES                   | 7954           | tusk             | CAMS-92095                     | >52,500                                |                      | -21.60                         | 7.35                          | >52,500                                                     |                      | n/a                      | n/a    |                         | (1)    |
| <i>Mammuthus</i>           | <i>primigenius</i> | IK98-0761   | UAMES                   | 9543           | ulna             | CAMS-121744                    | >53,400                                |                      | -20.80                         | 7.68                          | >53,400                                                     |                      | n/a                      | n/a    |                         | (1)    |
| <i>Mammuthus</i>           | <i>primigenius</i> | IK01-359    | UAMES                   | 12008          | molar            | CAMS-92092                     | >54,000                                |                      | -21.69                         | 8.41                          | >54,000                                                     |                      | n/a                      | n/a    |                         | (1)    |
| <i>Mammuthus</i>           | <i>primigenius</i> | IK02-042    | n/a                     | n/a            | pelvis           | CAMS-91961                     | >54,000                                |                      | -21.40                         | 6.37                          | >54,000                                                     |                      | n/a                      | n/a    |                         | (1)    |
| <i>Mammuthus</i>           | <i>primigenius</i> | IK98-1087   | UAMES                   | 9813           | molar            | CAMS-91795                     | >54,000                                |                      | -21.76                         | 8.65                          | >54,000                                                     |                      | n/a                      | n/a    |                         | (1)    |
| <i>Mammuthus</i>           | <i>primigenius</i> | IK01-132    | UAMES                   | 12035          | radius           | CAMS-120715 <sup>c</sup>       | >54,500                                |                      | -21.46                         | 6.64                          | >54,500                                                     |                      | n/a                      | n/a    |                         | (1)    |
| <i>Mammuthus</i>           | <i>primigenius</i> | IK01-082    | n/a                     | n/a            | tibia            | CAMS-120714 <sup>c</sup>       | >55,100                                |                      | -20.80                         | 5.07                          | >55,100                                                     |                      | n/a                      | n/a    |                         | (1)    |
| <i>Mammuthus</i>           | <i>primigenius</i> | IK98-0801   | UAMES                   | 9424           | metapodial       | CAMS-121746                    | >55,500                                |                      | -20.80                         | 7.88                          | >55,500                                                     |                      | n/a                      | n/a    |                         | (1)    |
| <i>Mammuthus</i>           | <i>primigenius</i> | IK98-1195   | UAMES                   | 9811           | radius           | CAMS-121749 <sup>c</sup>       | >55,500                                |                      | -21.10                         | 6.08                          | >55,500                                                     |                      | n/a                      | n/a    |                         | (1)    |
| <i>Ovibos</i> <sup>g</sup> | <i>moschatus</i>   | ING-99-1001 | UAMES                   | 8638           | cranium          | AA-48776                       | 226                                    | 59                   | -19.80                         | 3.76                          | 226                                                         | 59                   | ...                      | 456    |                         | (1)    |
| <i>Ovibos</i>              | <i>moschatus</i>   | Sing12-2    | UAMES                   | 30202          | cranium          | Beta-339445                    | 250                                    | 30                   | -20.00                         | 3.60                          | 250                                                         | 30                   | ...                      | 429    |                         | (1)    |
| <i>Ovibos</i>              | <i>moschatus</i>   | TUN12-1     | UAMES                   | 30203          | cranium          | Beta-339278                    | 340                                    | 30                   | -18.50                         | 4.80                          | 340                                                         | 30                   | 311                      | 481    |                         | (1)    |
| <i>Ovibos</i>              | <i>moschatus</i>   | NIG09-1     | n/a                     | n/a            | cranium          | Beta-283248                    | 350                                    | 40                   | -19.20                         | n/a                           | 350                                                         | 40                   | 312                      | 495    |                         | (1)    |
| <i>Ovibos</i>              | <i>moschatus</i>   | KEA1        | UAMES                   | 29498          | cranium          | Beta-244761                    | 900                                    | 40                   | -19.00                         | n/a                           | 900                                                         | 40                   | 735                      | 916    |                         | (1)    |
| <i>Ovibos</i>              | <i>moschatus</i>   | KEA2        | UAMES                   | 29499          | cranium          | Beta-223266                    | 1,140                                  | 40                   | -21.00                         | n/a                           | 1,070                                                       | 40                   | 926                      | 1,061  |                         | (1)    |
| <i>Ovibos</i>              | <i>moschatus</i>   | KEA3        | UAMES                   | 29500          | cranium          | Beta-244762                    | 1,080                                  | 40                   | -20.30                         | n/a                           | 1,080                                                       | 40                   | 926                      | 1,066  |                         | (1)    |
| <i>Ovibos</i>              | <i>moschatus</i>   | ING-99-1002 | UAMES                   | 8639           | cranium          | AA-48283                       | 1,148                                  | 42                   | -20.00                         | 5.56                          | 1,148                                                       | 42                   | 969                      | 1,177  |                         | (1)    |
| <i>Ovibos</i>              | <i>moschatus</i>   | IK99-353    | UAMES                   | 29501          | cranium          | AA-48263                       | 7,127                                  | 59                   | -19.60                         | 6.81                          | 7,127                                                       | 59                   | 7,799                    | 8,148  |                         | (1)    |
| <i>Ovibos</i>              | <i>moschatus</i>   | IK98-1032   | UAMES                   | 10098          | cranium          | AA-48757                       | 10,180                                 | 110                  | -19.80                         | 3.71                          | 10,180                                                      | 110                  | 11,356                   | 12,379 | x                       | (1)    |
| <i>Ovibos</i>              | <i>moschatus</i>   | TIT05-08    | UAMES                   | 29502          | tibia            | Beta-223267                    | 21,050                                 | 90                   | -20.80                         | n/a                           | 21,050                                                      | 90                   | 25,155                   | 25,640 | x                       | (1)    |
| <i>Ovibos</i>              | <i>moschatus</i>   | IK98-0819   | UAMES                   | 9673           | metatarsal       | AA-48753                       | 21,670                                 | 370                  | -19.40                         | 9.26                          | 21,670                                                      | 370                  | 25,228                   | 26,882 | x                       | (1)    |
| <i>Ovibos</i>              | <i>moschatus</i>   | IK98-0871   | UAMES                   | 9753           | metatarsal       | AA-48239                       | 27,580                                 | 750                  | -19.60                         | 9.31                          | 27,580                                                      | 750                  | 30,545                   | 33,582 | x                       | (1)    |
| <i>Ovibos</i>              | <i>moschatus</i>   | IK11-28     | UAMES                   | 29503          | scapula          | Beta-306116                    | 27,640                                 | 150                  | -21.00                         | n/a                           | 27,640                                                      | 150                  | 31,135                   | 31,685 | x                       | (1)    |
| <i>Ovibos</i>              | <i>moschatus</i>   | TIT09-01    | UAMES                   | 29504          | cranium          | Beta-263036                    | 30,950                                 | 240                  | -19.70                         | n/a                           | 30,950                                                      | 240                  | 34,386                   | 35,414 | x                       | (1)    |
| <i>Ovibos</i>              | <i>moschatus</i>   | TIT08-17    | UAMES                   | 29505          | metatarsal       | Beta-258464                    | 31,430                                 | 240                  | -20.60                         | n/a                           | 31,430                                                      | 240                  | 34,796                   | 35,881 | x                       | (1)    |
| <i>Ovibos</i>              | <i>moschatus</i>   | TIT10-04    | n/a                     | n/a            | cranium          | Beta-283251                    | 33,960                                 | 240                  | -18.80                         | n/a                           | 33,960                                                      | 240                  | 37,774                   | 39,021 | x                       | (1)    |

| Genus         | species          | field ID  | depository <sup>a</sup> | catalog number | skeletal element | <sup>14</sup> CLab# and number | <sup>14</sup> C date reported (yrs BP) |                      | $\delta^{13}\text{C}$ ‰ (VPDB) | $\delta^{15}\text{N}$ ‰ (AIR) | $\delta^{13}\text{C}$ -normalized date used for calibration |                      | 95.4% calibrated range   |        | used in Monte Carlo (x) | source |
|---------------|------------------|-----------|-------------------------|----------------|------------------|--------------------------------|----------------------------------------|----------------------|--------------------------------|-------------------------------|-------------------------------------------------------------|----------------------|--------------------------|--------|-------------------------|--------|
|               |                  |           |                         |                |                  |                                | <sup>14</sup> C date                   | std dev <sup>e</sup> |                                |                               | <sup>14</sup> C date                                        | std dev <sup>e</sup> | (cal yr BP) <sup>f</sup> |        |                         |        |
| <i>Ovibos</i> | <i>moschatus</i> | IK01-159  | UAMES                   | 11886          | metatarsal       | Beta-286418                    | 34,570                                 | 250                  | -20.20                         | 8.58                          | 34,570                                                      | 250                  | 38,542                   | 39,699 | x                       | (1)    |
| <i>Ovibos</i> | <i>moschatus</i> | IK01-313  | UAMES                   | 11685          | metatarsal       | AA-48277                       | 35,920                                 | 930                  | -19.60                         | 7.43                          | 35,920                                                      | 930                  | 38,755                   | 42,174 | x                       | (1)    |
| <i>Ovibos</i> | <i>moschatus</i> | IK01-294  | UAMES                   | 11628          | metatarsal       | AA-48276                       | 36,400                                 | 770                  | -20.00                         | 7.27                          | 36,400                                                      | 770                  | 39,531                   | 42,308 | x                       | (1)    |
| <i>Ovibos</i> | <i>moschatus</i> | IK99-179  | UAMES                   | 10709          | mandible         | Beta-286425                    | 40,080                                 | 340                  | -20.00                         | n/a                           | 40,080                                                      | 340                  | 43,075                   | 44,400 | x                       | (1)    |
| <i>Ovibos</i> | <i>moschatus</i> | TIT08-13  | UAMES                   | 29506          | cranium          | Beta-258463                    | 40,410                                 | 780                  | -21.20                         | n/a                           | 40,410                                                      | 780                  | 42,827                   | 45,445 | x                       | (1)    |
| <i>Ovibos</i> | <i>moschatus</i> | IK99-047  | UAMES                   | 10573          | mandible         | Beta-286423                    | 40,950                                 | 570                  | -20.10                         | n/a                           | 40,950                                                      | 570                  | 43,418                   | 45,513 | x                       | (1)    |
| <i>Ovibos</i> | <i>moschatus</i> | IK97-501  | UAMES                   | 29507          | cranium          | Beta-117141                    | 41,470                                 | 1,050                | -23.80                         | n/a                           | 41,470                                                      | 1,050                | 43,147                   | 47,254 | x                       | (1)    |
| <i>Ovibos</i> | <i>moschatus</i> | IK98-1173 | n/a                     | n/a            | axis             | CAMS-53908                     | 43,000                                 | 1,800                | -19.90                         | 4.25                          | 43,000                                                      | 1,800                | 44,215                   | 49,997 | x                       | (1)    |
| <i>Ovibos</i> | <i>moschatus</i> | IK98-0393 | UAMES                   | 8813           | metacarpal       | AA-48748                       | >35,500                                |                      | -19.10                         | 8.20                          | >35,500                                                     |                      | n/a                      | n/a    |                         | (1)    |
| <i>Ovibos</i> | <i>moschatus</i> | IK98-0673 | UAMES                   | 9641           | metatarsal       | Beta-286422                    | >36,200                                |                      | -20.70                         | 5.25                          | >36,200                                                     |                      | n/a                      | n/a    |                         | (1)    |
| <i>Ovibos</i> | <i>moschatus</i> | IK98-0654 | UAMES                   | 9439           | metacarpal       | AA-48750                       | >37,100                                |                      | -18.70                         | 2.40                          | >37,100                                                     |                      | n/a                      | n/a    |                         | (1)    |
| <i>Ovibos</i> | <i>moschatus</i> | IK98-0469 | UAMES                   | 9259           | metacarpal       | Beta-286421                    | >37,300                                |                      | -20.20                         | 7.28                          | >37,300                                                     |                      | n/a                      | n/a    |                         | (1)    |
| <i>Ovibos</i> | <i>moschatus</i> | IK98-0387 | UAMES                   | 8786           | cranium          | Beta-286420                    | >39,500                                |                      | -20.50                         | 7.24                          | >39,500                                                     |                      | n/a                      | n/a    |                         | (1)    |
| <i>Ovibos</i> | <i>moschatus</i> | IK98-1221 | UAMES                   | 9875           | metacarpal       | AA-48258                       | >39,800                                |                      | -20.10                         | 5.32                          | >39,800                                                     |                      | n/a                      | n/a    |                         | (1)    |
| <i>Ovibos</i> | <i>moschatus</i> | IK98-1324 | UAMES                   | 9890           | horn core        | AA-48260                       | >39,900                                |                      | -19.20                         | 2.73                          | >39,900                                                     |                      | n/a                      | n/a    |                         | (1)    |
| <i>Ovibos</i> | <i>moschatus</i> | IK01-086  | UAMES                   | 11674          | metatarsal       | AA-48771                       | >40,000                                |                      | -20.40                         | 3.17                          | >40,000                                                     |                      | n/a                      | n/a    |                         | (1)    |
| <i>Ovibos</i> | <i>moschatus</i> | IK09-05   | UAMES                   | 29508          | femur            | Beta-263030                    | >40,000                                |                      | -19.50                         | n/a                           | >40,000                                                     |                      | n/a                      | n/a    |                         | (1)    |
| <i>Ovibos</i> | <i>moschatus</i> | IK09-06   | UAMES                   | 29509          | femur            | Beta-263031                    | >40,000                                |                      | -21.00                         | n/a                           | >40,000                                                     |                      | n/a                      | n/a    |                         | (1)    |
| <i>Ovibos</i> | <i>moschatus</i> | IK98-1028 | UAMES                   | 9959           | cranium          | AA-48756                       | >40,000                                |                      | -19.90                         | 8.84                          | >40,000                                                     |                      | n/a                      | n/a    |                         | (1)    |
| <i>Ovibos</i> | <i>moschatus</i> | IK98-1309 | UAMES                   | 9834           | metacarpal       | AA-48761                       | >40,000                                |                      | -19.20                         | 8.36                          | >40,000                                                     |                      | n/a                      | n/a    |                         | (1)    |
| <i>Ovibos</i> | <i>moschatus</i> | IK99-142  | UAMES                   | 10682          | cranium          | AA-48764                       | >40,000                                |                      | -19.40                         | 3.51                          | >40,000                                                     |                      | n/a                      | n/a    |                         | (1)    |
| <i>Ovibos</i> | <i>moschatus</i> | IK99-731  | UAMES                   | 10845          | metatarsal       | AA-48768                       | >40,000                                |                      | -19.60                         | 9.17                          | >40,000                                                     |                      | n/a                      | n/a    |                         | (1)    |
| <i>Ovibos</i> | <i>moschatus</i> | IK99-754  | UAMES                   | 10936          | metatarsal       | AA-48769                       | >40,000                                |                      | -18.90                         | 8.75                          | >40,000                                                     |                      | n/a                      | n/a    |                         | (1)    |
| <i>Ovibos</i> | <i>moschatus</i> | IK98-0028 | UAMES                   | 9068           | metacarpal       | AA-48252                       | >40,100                                |                      | -19.30                         | 4.21                          | >40,100                                                     |                      | n/a                      | n/a    |                         | (1)    |
| <i>Ovibos</i> | <i>moschatus</i> | IK98-0818 | UAMES                   | 9677           | metatarsal       | AA-48238                       | >40,100                                |                      | -19.70                         | 7.96                          | >40,100                                                     |                      | n/a                      | n/a    |                         | (1)    |
| <i>Ovibos</i> | <i>moschatus</i> | IK98-1288 | UAMES                   | 10017          | metacarpal       | AA-48259                       | >40,200                                |                      | -19.40                         | 6.89                          | >40,200                                                     |                      | n/a                      | n/a    |                         | (1)    |
| <i>Ovibos</i> | <i>moschatus</i> | IK98-0441 | UAMES                   | 8926           | metacarpal       | AA-48254                       | >40,300                                |                      | -19.90                         | 5.52                          | >40,300                                                     |                      | n/a                      | n/a    |                         | (1)    |
| <i>Ovibos</i> | <i>moschatus</i> | IK01-311  | UAMES                   | 11662          | metacarpal       | AA-48250                       | >40,700                                |                      | -20.00                         | 6.96                          | >40,700                                                     |                      | n/a                      | n/a    |                         | (1)    |
| <i>Ovibos</i> | <i>moschatus</i> | IK01-398  | UAMES                   | 11840          | metacarpal       | AA-48279                       | >40,900                                |                      | -20.20                         | 5.75                          | >40,900                                                     |                      | n/a                      | n/a    |                         | (1)    |
| <i>Ovibos</i> | <i>moschatus</i> | IK01-136  | UAMES                   | 11888          | metatarsal       | AA-48272                       | >41,000                                |                      | -19.90                         | 5.54                          | >41,000                                                     |                      | n/a                      | n/a    |                         | (1)    |
| <i>Ovibos</i> | <i>moschatus</i> | IK01-160  | UAMES                   | 11887          | metatarsal       | AA-48249                       | >41,000                                |                      | -20.00                         | 7.10                          | >41,000                                                     |                      | n/a                      | n/a    |                         | (1)    |



| Genus         | species          | field ID  | depository <sup>a</sup> | catalog number | skeletal element | <sup>14</sup> CLab# and number | <sup>14</sup> C date reported (yrs BP) |                      | $\delta^{13}\text{C}$ ‰ (VPDB) | $\delta^{15}\text{N}$ ‰ (AIR) | $\delta^{13}\text{C}$ -normalized date used for calibration |                      | 95.4% calibrated range   |     | used in Monte Carlo (x) | source |
|---------------|------------------|-----------|-------------------------|----------------|------------------|--------------------------------|----------------------------------------|----------------------|--------------------------------|-------------------------------|-------------------------------------------------------------|----------------------|--------------------------|-----|-------------------------|--------|
|               |                  |           |                         |                |                  |                                | <sup>14</sup> C date                   | std dev <sup>e</sup> |                                |                               | <sup>14</sup> C date                                        | std dev <sup>e</sup> | (cal yr BP) <sup>f</sup> |     |                         |        |
| <i>Ovibos</i> | <i>moschatus</i> | IK98-0849 | UAMES                   | 9336           | metacarpal       | AA-48257                       | >41,000                                |                      | -19.60                         | 5.53                          | >41,000                                                     |                      | n/a                      | n/a |                         | (1)    |
| <i>Ovibos</i> | <i>moschatus</i> | IK98-0980 | UAMES                   | 9740           | metatarsal       | AA-48755                       | >41,000                                |                      | -20.40                         | n/a                           | >41,000                                                     |                      | n/a                      | n/a |                         | (1)    |
| <i>Ovibos</i> | <i>moschatus</i> | IK99-729  | UAMES                   | 10843          | metacarpal       | AA-48265                       | >41,000                                |                      | -19.70                         | 9.17                          | >41,000                                                     |                      | n/a                      | n/a |                         | (1)    |
| <i>Ovibos</i> | <i>moschatus</i> | IK01-073  | UAMES                   | 11862          | cranium          | AA-48267                       | >41,100                                |                      | -19.80                         | 5.62                          | >41,100                                                     |                      | n/a                      | n/a |                         | (1)    |
| <i>Ovibos</i> | <i>moschatus</i> | IK98-0029 | UAMES                   | 9069           | metacarpal       | AA-48744                       | >41,100                                |                      | -19.30                         | 3.43                          | >41,100                                                     |                      | n/a                      | n/a |                         | (1)    |
| <i>Ovibos</i> | <i>moschatus</i> | IK98-0049 | UAMES                   | 8911           | metacarpal       | AA-48745                       | >41,100                                |                      | -19.20                         | 10.71                         | >41,100                                                     |                      | n/a                      | n/a |                         | (1)    |
| <i>Ovibos</i> | <i>moschatus</i> | IK98-0089 | UAMES                   | 9095           | metacarpal       | AA-48746                       | >41,100                                |                      | -19.70                         | 8.85                          | >41,100                                                     |                      | n/a                      | n/a |                         | (1)    |
| <i>Ovibos</i> | <i>moschatus</i> | IK98-0133 | UAMES                   | 9122           | metacarpal       | AA-48747                       | >41,100                                |                      | -20.20                         | 7.69                          | >41,100                                                     |                      | n/a                      | n/a |                         | (1)    |
| <i>Ovibos</i> | <i>moschatus</i> | IK98-0286 | UAMES                   | 8836           | metacarpal       | AA-48236                       | >41,100                                |                      | -19.80                         | 2.25                          | >41,100                                                     |                      | n/a                      | n/a |                         | (1)    |
| <i>Ovibos</i> | <i>moschatus</i> | IK98-0461 | UAMES                   | 9251           | metacarpal       | AA-48237                       | >41,100                                |                      | -19.90                         | 6.01                          | >41,100                                                     |                      | n/a                      | n/a |                         | (1)    |
| <i>Ovibos</i> | <i>moschatus</i> | IK98-0513 | UAMES                   | 9610           | metatarsal       | AA-48255                       | >41,100                                |                      | -20.10                         | 6.62                          | >41,100                                                     |                      | n/a                      | n/a |                         | (1)    |
| <i>Ovibos</i> | <i>moschatus</i> | IK98-0653 | UAMES                   | 9438           | metacarpal       | AA-48256                       | >41,100                                |                      | -19.60                         | 5.97                          | >41,100                                                     |                      | n/a                      | n/a |                         | (1)    |
| <i>Ovibos</i> | <i>moschatus</i> | IK98-0742 | UAMES                   | 9471           | metatarsal       | AA-48752                       | >41,100                                |                      | -19.70                         | 2.64                          | >41,100                                                     |                      | n/a                      | n/a |                         | (1)    |
| <i>Ovibos</i> | <i>moschatus</i> | IK98-0930 | UAMES                   | 9504           | metacarpal       | AA-48754                       | >41,100                                |                      | -20.10                         | 6.57                          | >41,100                                                     |                      | n/a                      | n/a |                         | (1)    |
| <i>Ovibos</i> | <i>moschatus</i> | IK98-1027 | UAMES                   | 9958           | cranium          | AA-48240                       | >41,100                                |                      | -19.60                         | 3.07                          | >41,100                                                     |                      | n/a                      | n/a |                         | (1)    |
| <i>Ovibos</i> | <i>moschatus</i> | IK98-1044 | UAMES                   | 10044          | metacarpal       | AA-48241                       | >41,100                                |                      | -19.00                         | 7.37                          | >41,100                                                     |                      | n/a                      | n/a |                         | (1)    |
| <i>Ovibos</i> | <i>moschatus</i> | IK98-1124 | UAMES                   | 9918           | metacarpal       | AA-48242                       | >41,100                                |                      | -19.40                         | 6.10                          | >41,100                                                     |                      | n/a                      | n/a |                         | (1)    |
| <i>Ovibos</i> | <i>moschatus</i> | IK99-143  | UAMES                   | 10683          | cranium          | AA-48244                       | >41,100                                |                      | -20.40                         | 4.66                          | >41,100                                                     |                      | n/a                      | n/a |                         | (1)    |
| <i>Ovibos</i> | <i>moschatus</i> | IK99-320  | UAMES                   | 10559          | metacarpal       | AA-48245                       | >41,100                                |                      | -20.10                         | 3.80                          | >41,100                                                     |                      | n/a                      | n/a |                         | (1)    |
| <i>Ovibos</i> | <i>moschatus</i> | IK99-504  | UAMES                   | 10883          | metatarsal       | AA-48264                       | >41,100                                |                      | -20.00                         | 8.79                          | >41,100                                                     |                      | n/a                      | n/a |                         | (1)    |
| <i>Ovibos</i> | <i>moschatus</i> | IK98-1123 | UAMES                   | 9922           | metacarpal       | AA-48758                       | >41,100                                |                      | -19.90                         | 6.46                          | >41,100                                                     |                      | n/a                      | n/a |                         | (1)    |
| <i>Ovibos</i> | <i>moschatus</i> | IK98-1289 | UAMES                   | 10018          | metacarpal       | AA-48760                       | >41,100                                |                      | -20.60                         | 7.30                          | >41,100                                                     |                      | n/a                      | n/a |                         | (1)    |
| <i>Ovibos</i> | <i>moschatus</i> | IK98-1267 | UAMES                   | 10058          | cranium          | AA-48759                       | >41,100                                |                      | -20.50                         | 6.41                          | >41,100                                                     |                      | n/a                      | n/a |                         | (1)    |
| <i>Ovibos</i> | <i>moschatus</i> | IK99-045  | UAMES                   | 11130          | cranium          | AA-48762                       | >41,100                                |                      | -19.60                         | n/a                           | >41,100                                                     |                      | n/a                      | n/a |                         | (1)    |
| <i>Ovibos</i> | <i>moschatus</i> | IK99-096  | UAMES                   | 10729          | metatarsal       | AA-48763                       | >41,100                                |                      | -20.60                         | n/a                           | >41,100                                                     |                      | n/a                      | n/a |                         | (1)    |
| <i>Ovibos</i> | <i>moschatus</i> | IK99-255  | UAMES                   | 10645          | metacarpal       | AA-48765                       | >41,100                                |                      | -19.50                         | 9.14                          | >41,100                                                     |                      | n/a                      | n/a |                         | (1)    |
| <i>Ovibos</i> | <i>moschatus</i> | KIK09-01  | UAMES                   | 29510          | cranium          | Beta-263034                    | >41,500                                |                      | -20.60                         | n/a                           | >41,500                                                     |                      | n/a                      | n/a |                         | (1)    |
| <i>Ovibos</i> | <i>moschatus</i> | IK09-08   | UAMES                   | 29511          | mandible         | Beta-263033                    | >42,000                                |                      | -18.60                         | n/a                           | >42,000                                                     |                      | n/a                      | n/a |                         | (1)    |
| <i>Ovibos</i> | <i>moschatus</i> | IK10-04   | UAMES                   | 29512          | cranium          | Beta-283245                    | >43,500                                |                      | -19.70                         | n/a                           | >43,500                                                     |                      | n/a                      | n/a |                         | (1)    |
| <i>Ovibos</i> | <i>moschatus</i> | IK99-133  | UAMES                   | 10832          | mandible         | Beta-286424                    | >43,500                                |                      | -19.70                         | n/a                           | >43,500                                                     |                      | n/a                      | n/a |                         | (1)    |
| <i>Ovibos</i> | <i>moschatus</i> | IK08-17   | UAMES                   | 29514          | mandible         | Beta-258459                    | >44,000                                |                      | -20.20                         | n/a                           | >44,000                                                     |                      | n/a                      | n/a |                         | (1)    |

| Genus           | species          | field ID   | depository <sup>a</sup> | catalog number | skeletal element  | <sup>14</sup> CLab# and number | <sup>14</sup> C date reported (yrs BP) |                      | $\delta^{13}\text{C}$ ‰ (VPDB) | $\delta^{15}\text{N}$ ‰ (AIR) | $\delta^{13}\text{C}$ -normalized date used for calibration |                      | 95.4% calibrated range   |        | used in Monte Carlo (x) | source |
|-----------------|------------------|------------|-------------------------|----------------|-------------------|--------------------------------|----------------------------------------|----------------------|--------------------------------|-------------------------------|-------------------------------------------------------------|----------------------|--------------------------|--------|-------------------------|--------|
|                 |                  |            |                         |                |                   |                                | <sup>14</sup> C date                   | std dev <sup>e</sup> |                                |                               | <sup>14</sup> C date                                        | std dev <sup>e</sup> | (cal yr BP) <sup>f</sup> |        |                         |        |
| <i>Ovibos</i>   | <i>moschatus</i> | IK08-33    | UAMES                   | 29515          | cranium           | Beta-258460                    | >44,000                                |                      | -20.20                         | n/a                           | >44,000                                                     |                      | n/a                      | n/a    |                         | (1)    |
| <i>Ovibos</i>   | <i>moschatus</i> | IK98-1220  | UAMES                   | 9874           | phalange          | Beta-175459                    | >45,720                                |                      | -20.50                         | 6.41                          | >45,720                                                     |                      | n/a                      | n/a    |                         | (1)    |
| <i>Ovibos</i>   | <i>moschatus</i> | IK99-142   | UAMES                   | 10682          | cranium           | Beta-175460                    | >48,420                                |                      | -19.90                         | 3.51                          | >48,420                                                     |                      | n/a                      | n/a    |                         | (1)    |
| <i>Ovibos</i>   | <i>moschatus</i> | TIT05-06.1 | UAMES                   | 29516          | cranium           | Beta-223269                    | >49,800                                |                      | -20.70                         | n/a                           | >49,800                                                     |                      | n/a                      | n/a    |                         | (1)    |
| <i>Panthera</i> | <i>spelaea</i>   | IK98-278   | UAMES                   | 8807           | mandible          | CAMS-53909                     | 11,290                                 | 50                   | -18.60                         | 4.89                          | 11,290                                                      | 50                   | 13,064                   | 13,256 | x                       | (1)    |
| <i>Panthera</i> | <i>spelaea</i>   | IK01-409   | UAMES                   | 12041          | humerus           | OxA-13473 <sup>c</sup>         | 12,630                                 | 60                   | -18.50                         | 8.03                          | 12,630                                                      | 60                   | 14,716                   | 15,231 | x                       | (10)   |
| <i>Panthera</i> | <i>spelaea</i>   | IK01-409   | UAMES                   | 12041          | humerus           | AA-48280 <sup>c</sup>          | 12,930                                 | 130                  | -18.40                         | 8.03                          | 12,930                                                      | 130                  | 15,099                   | 15,878 | x                       | (1)    |
| <i>Panthera</i> | <i>spelaea</i>   | MAY12-24   | UAMES                   | 29517          | humerus           | Beta-331881                    | 15,990                                 | 60                   | -18.50                         | 8.80                          | 15,990                                                      | 60                   | 19,084                   | 19,516 | x                       | (1)    |
| <i>Panthera</i> | <i>spelaea</i>   | TIT12-07   | UAMES                   | 30204          | calcaneus         | Beta-339277                    | 30,520                                 | 180                  | -18.70                         | 9.20                          | 30,520                                                      | 180                  | 34,107                   | 34,835 | x                       | (1)    |
| <i>Panthera</i> | <i>spelaea</i>   | IK06-18    | UAMES                   | 29518          | humerus           | Beta-286419                    | 33,260                                 | 230                  | -18.60                         | n/a                           | 33,260                                                      | 230                  | 36,710                   | 38,321 | x                       | (1)    |
| <i>Panthera</i> | <i>spelaea</i>   | IK97-1001  | UAMES                   | 11013          | humerus           | Beta-117142                    | 35,710                                 | 1,180                | -22.50                         | 8.53                          | 35,670                                                      | 1,180                | 38,040                   | 42,628 | x                       | (1)    |
| <i>Panthera</i> | <i>spelaea</i>   | IK98-436   | UAMES                   | 8983           | phalanx           | CAMS-53910                     | 40,900                                 | 1,140                | -18.10                         | 8.78                          | 40,900                                                      | 1,140                | 42,697                   | 46,891 | x                       | (1)    |
| <i>Panthera</i> | <i>spelaea</i>   | IK02-164   | UAMES                   | 10389          | humerus           | CAMS-91784                     | 48,300                                 | 2,100                | -19.47                         | 10.97                         | 48,300                                                      | 2,100                | 44,704                   | 54,980 |                         | (1)    |
| <i>Panthera</i> | <i>spelaea</i>   | IK01-112   | UAMES                   | 12045          | humerus           | AA-48271                       | >41,100                                |                      | -18.80                         | 7.79                          | >41,100                                                     |                      | n/a                      | n/a    |                         | (1)    |
| <i>Rangifer</i> | <i>tarandus</i>  | IK98-0804  | UAMES                   | 9426           | mandible          | CAMS-64413                     | 160                                    | 40                   | -19.19                         | 3.80                          | 150                                                         | 40                   | ...                      | 285    |                         | (1)    |
| <i>Rangifer</i> | <i>tarandus</i>  | IK98-0589  | UAMES                   | 9283           | humerus           | CAMS-64409                     | 200                                    | 50                   | -18.26                         | 2.14                          | 190                                                         | 50                   | ...                      | 308    |                         | (1)    |
| <i>Rangifer</i> | <i>tarandus</i>  | IK98-0875  | UAMES                   | 9496           | mandible          | CAMS-64416                     | 220                                    | 40                   | -18.66                         | 2.91                          | 210                                                         | 40                   | ...                      | 421    |                         | (1)    |
| <i>Rangifer</i> | <i>tarandus</i>  | IK99-421   | UAMES                   | 10579          | humerus           | CAMS-64465                     | 350                                    | 30                   | -18.67                         | 2.30                          | 340                                                         | 40                   | 308                      | 489    |                         | (1)    |
| <i>Rangifer</i> | <i>tarandus</i>  | IK98-0385  | UAMES                   | 8784           | humerus           | CAMS-64403                     | 390                                    | 40                   | -18.15                         | 2.74                          | 370                                                         | 40                   | 315                      | 505    |                         | (1)    |
| <i>Rangifer</i> | <i>tarandus</i>  | XCL-010    | n/a                     | n/a            | n.r. <sup>b</sup> | GaK-2304                       | 1,470 <sup>d</sup>                     | 80                   | -18.70*                        | n/a                           | 573                                                         | 80                   | 499                      | 676    |                         | (8)    |
| <i>Rangifer</i> | <i>tarandus</i>  | IK98-0155  | n/a                     | n/a            | metapodial        | CAMS-64397                     | 1,120                                  | 40                   | -18.11                         | 2.49                          | 1,100                                                       | 40                   | 929                      | 1,173  |                         | (1)    |
| <i>Rangifer</i> | <i>tarandus</i>  | IK99-314   | UAMES                   | 10766          | mandible          | CAMS-64462                     | 1,190                                  | 30                   | -18.18                         | 2.29                          | 1,170                                                       | 40                   | 978                      | 1,221  |                         | (1)    |
| <i>Rangifer</i> | <i>tarandus</i>  | XPH-003    | n/a                     | n/a            | n.r. <sup>b</sup> | P-98                           | 1,619 <sup>d</sup>                     | 210                  | -18.70*                        | n/a                           | 1,722                                                       | 210                  | 1,264                    | 2,291  |                         | (8)    |
| <i>Rangifer</i> | <i>tarandus</i>  | IK98-1284  | UAMES                   | 10013          | humerus           | CAMS-64453                     | 2,140                                  | 40                   | -18.52                         | 2.65                          | 2,130                                                       | 40                   | 1,995                    | 2,304  |                         | (1)    |
| <i>Rangifer</i> | <i>tarandus</i>  | XBP-007    | n/a                     | n/a            | n.r. <sup>b</sup> | Uga-3719                       | 2,075 <sup>d</sup>                     | 70                   | -18.70*                        | n/a                           | 2,178                                                       | 70                   | 2,004                    | 2,336  |                         | (8)    |
| <i>Rangifer</i> | <i>tarandus</i>  | IK98-1038  | UAMES                   | 9983           | metatarsal        | CAMS-64420                     | 2,600                                  | 40                   | -17.59                         | 2.36                          | 2,580                                                       | 50                   | 2,490                    | 2,785  |                         | (1)    |
| <i>Rangifer</i> | <i>tarandus</i>  | IK98-0898  | n/a                     | n/a            | n.r. <sup>b</sup> | CAMS-64418                     | 2,640                                  | 50                   | -20.60                         | -0.49                         | 2,640                                                       | 50                   | 2,548                    | 2,868  |                         | (1)    |
| <i>Rangifer</i> | <i>tarandus</i>  | XCL-002    | n/a                     | n/a            | n.r. <sup>b</sup> | SM-917                         | 3,042 <sup>d</sup>                     | 188                  | -18.70*                        | n/a                           | 3,145                                                       | 188                  | 2,878                    | 3,828  |                         | (8)    |
| <i>Rangifer</i> | <i>tarandus</i>  | IK98-0083  | UAMES                   | 8988           | mandible          | CAMS-64395                     | 7,830                                  | 40                   | -19.11                         | 2.42                          | 7,820                                                       | 50                   | 8,455                    | 8,765  |                         | (1)    |
| <i>Rangifer</i> | <i>tarandus</i>  | IK99-397   | UAMES                   | 10740          | humerus           | CAMS-64463                     | 8,830                                  | 40                   | -18.10                         | 1.74                          | 8,810                                                       | 40                   | 9,684                    | 10,147 |                         | (1)    |
| <i>Rangifer</i> | <i>tarandus</i>  | IK99-044   | UAMES                   | 10571          | metatarsal        | CAMS-64454                     | 8,890                                  | 50                   | -17.81                         | 1.36                          | 8,870                                                       | 50                   | 9,765                    | 10,180 |                         | (1)    |

| Genus           | species         | field ID  | depository <sup>a</sup> | catalog number | skeletal element  | <sup>14</sup> CLab# and number | <sup>14</sup> C date reported (yrs BP) |                      | $\delta^{13}\text{C}$ ‰ (VPDB) | $\delta^{15}\text{N}$ ‰ (AIR) | $\delta^{13}\text{C}$ -normalized date used for calibration |                      | 95.4% calibrated range   |        | used in Monte Carlo (x) | source |
|-----------------|-----------------|-----------|-------------------------|----------------|-------------------|--------------------------------|----------------------------------------|----------------------|--------------------------------|-------------------------------|-------------------------------------------------------------|----------------------|--------------------------|--------|-------------------------|--------|
|                 |                 |           |                         |                |                   |                                | <sup>14</sup> C date                   | std dev <sup>e</sup> |                                |                               | <sup>14</sup> C date                                        | std dev <sup>e</sup> | (cal yr BP) <sup>f</sup> |        |                         |        |
| <i>Rangifer</i> | <i>tarandus</i> | IK98-0627 | UAMES                   | 9601           | metapodial        | CAMS-64410                     | 12,370                                 | 50                   | -18.79                         | 2.80                          | 12,360                                                      | 50                   | 14,120                   | 14,720 | x                       | (1)    |
| <i>Rangifer</i> | <i>tarandus</i> | IK97-601  | n/a                     | n/a            | n.r. <sup>b</sup> | Beta-117140                    | 12,710                                 | 100                  | -23.30                         | n/a                           | 12,680                                                      | 100                  | 14,558                   | 15,435 | x                       | (1)    |
| <i>Rangifer</i> | <i>tarandus</i> | IK99-594  | UAMES                   | 11000          | metacarpal        | CAMS-64470                     | 13,250                                 | 50                   | -18.94                         | 3.06                          | 13,240                                                      | 50                   | 15,730                   | 16,101 | x                       | (1)    |
| <i>Rangifer</i> | <i>tarandus</i> | IK98-0585 | UAMES                   | 9704           | metacarpal        | CAMS-64408                     | 14,380                                 | 50                   | -19.25                         | 3.00                          | 14,370                                                      | 50                   | 17,307                   | 17,696 | x                       | (1)    |
| <i>Rangifer</i> | <i>tarandus</i> | IK98-0879 | UAMES                   | 3296           | metacarpal        | CAMS-64417                     | 16,950                                 | 50                   | -18.88                         | 9.17                          | 16,940                                                      | 60                   | 20,210                   | 20,624 | x                       | (1)    |
| <i>Rangifer</i> | <i>tarandus</i> | IK98-0846 | UAMES                   | 9325           | humerus           | CAMS-64415                     | 17,610                                 | 60                   | -19.16                         | 7.56                          | 17,600                                                      | 60                   | 21,014                   | 21,519 | x                       | (1)    |
| <i>Rangifer</i> | <i>tarandus</i> | IK99-089  | UAMES                   | 10654          | metatarsal        | CAMS-64456                     | 18,410                                 | 60                   | -18.88                         | 5.90                          | 18,400                                                      | 60                   | 22,027                   | 22,453 | x                       | (1)    |
| <i>Rangifer</i> | <i>tarandus</i> | IK98-0265 | UAMES                   | 9186           | humerus           | CAMS-64398                     | 20,480                                 | 80                   | -18.95                         | 7.15                          | 20,470                                                      | 80                   | 24,329                   | 24,983 | x                       | (1)    |
| <i>Rangifer</i> | <i>tarandus</i> | IK98-0031 | UAMES                   | 9089           | metacarpal        | CAMS-64392                     | 24,750                                 | 110                  | -19.87                         | 8.70                          | 24,750                                                      | 110                  | 28,498                   | 29,060 | x                       | (1)    |
| <i>Rangifer</i> | <i>tarandus</i> | M-98-064  | UAMES                   | 9110           | mandible          | CAMS-64475                     | 24,940                                 | 110                  | -19.17                         | 6.23                          | 24,940                                                      | 110                  | 28,676                   | 29,316 | x                       | (1)    |
| <i>Rangifer</i> | <i>tarandus</i> | IK97-402  | n/a                     | n/a            | n.r. <sup>b</sup> | Beta-117139                    | 25,190                                 | 190                  | -22.70                         | n/a                           | 25,190                                                      | 190                  | 28,775                   | 29,706 | x                       | (1)    |
| <i>Rangifer</i> | <i>tarandus</i> | IK98-0690 | UAMES                   | 9598           | humerus           | CAMS-64412                     | 27,420                                 | 190                  | -17.86                         | 6.27                          | 27,400                                                      | 190                  | 31,006                   | 31,535 | x                       | (1)    |
| <i>Rangifer</i> | <i>tarandus</i> | IK98-0311 | UAMES                   | 8944           | humerus           | CAMS-64400                     | 28,760                                 | 160                  | -18.36                         | 3.73                          | 28,740                                                      | 170                  | 32,240                   | 33,465 | x                       | (1)    |
| <i>Rangifer</i> | <i>tarandus</i> | IK98-0833 | UAMES                   | 9300           | humerus           | CAMS-64414                     | 28,930                                 | 170                  | -18.51                         | 7.02                          | 28,920                                                      | 170                  | 32,631                   | 33,606 | x                       | (1)    |
| <i>Rangifer</i> | <i>tarandus</i> | IK98-0079 | UAMES                   | 8900           | metacarpal        | CAMS-64394                     | 30,050                                 | 210                  | -18.34                         | 3.34                          | 30,040                                                      | 210                  | 33,751                   | 34,528 | x                       | (1)    |
| <i>Rangifer</i> | <i>tarandus</i> | IK98-1207 | UAMES                   | 9831           | mandible          | CAMS-64471                     | 30,270                                 | 200                  | -18.21                         | 3.75                          | 30,250                                                      | 200                  | 33,905                   | 34,665 | x                       | (1)    |
| <i>Rangifer</i> | <i>tarandus</i> | IK99-171  | UAMES                   | 10994          | metacarpal        | CAMS-64457                     | 30,820                                 | 200                  | -19.00                         | 3.92                          | 30,810                                                      | 200                  | 34,300                   | 35,143 | x                       | (1)    |
| <i>Rangifer</i> | <i>tarandus</i> | IK99-570  | UAMES                   | 10847          | cranium           | CAMS-64468                     | 31,830                                 | 330                  | -17.73                         | 2.26                          | 31,820                                                      | 330                  | 34,995                   | 36,381 | x                       | (1)    |
| <i>Rangifer</i> | <i>tarandus</i> | IK99-409  | UAMES                   | 3281           | humerus           | CAMS-64464                     | 31,920                                 | 240                  | -18.16                         | 3.95                          | 31,900                                                      | 240                  | 35,240                   | 36,310 | x                       | (1)    |
| <i>Rangifer</i> | <i>tarandus</i> | IK98-0983 | UAMES                   | 9743           | humerus           | CAMS-64419                     | 32,570                                 | 250                  | -18.64                         | 2.59                          | 32,550                                                      | 250                  | 35,877                   | 37,372 | x                       | (1)    |
| <i>Rangifer</i> | <i>tarandus</i> | IK98-0479 | UAMES                   | 9270           | metapodial        | CAMS-64406                     | 37,570                                 | 580                  | -17.65                         | 1.61                          | 37,570                                                      | 580                  | 41,093                   | 42,810 | x                       | (1)    |
| <i>Rangifer</i> | <i>tarandus</i> | IK99-543  | UAMES                   | 10919          | metacarpal        | CAMS-64466                     | 38,830                                 | 540                  | -18.12                         | 3.77                          | 38,810                                                      | 540                  | 42,026                   | 43,667 | x                       | (1)    |
| <i>Rangifer</i> | <i>tarandus</i> | IK99-066  | UAMES                   | 10547          | humerus           | CAMS-64455                     | 40,840                                 | 950                  | -18.11                         | 5.40                          | 40,820                                                      | 950                  | 42,870                   | 46,192 | x                       | (1)    |
| <i>Rangifer</i> | <i>tarandus</i> | IK98-0350 | UAMES                   | 9107           | metatarsal        | CAMS-64401                     | 41,100                                 | 1,100                | -18.03                         | 0.95                          | 41,100                                                      | 1,100                | 42,859                   | 46,979 | x                       | (1)    |
| <i>Rangifer</i> | <i>tarandus</i> | IK98-0450 | UAMES                   | 9032           | metatarsal        | CAMS-64404                     | 42,040                                 | 800                  | -19.38                         | 2.39                          | 42,030                                                      | 800                  | 44,021                   | 47,180 | x                       | (1)    |
| <i>Rangifer</i> | <i>tarandus</i> | IK99-764  | UAMES                   | 11016          | humerus           | CAMS-64473                     | 42,500                                 | 1,200                | -18.50                         | 1.82                          | 42,500                                                      | 1,200                | 43,930                   | 48,913 | x                       | (1)    |
| <i>Rangifer</i> | <i>tarandus</i> | IK98-0478 | UAMES                   | 9269           | metapodial        | CAMS-64405                     | 44,200                                 | 1,000                | -17.30                         | 2.99                          | 44,200                                                      | 1,000                | 45,824                   | 49,729 |                         | (1)    |
| <i>Rangifer</i> | <i>tarandus</i> | IK98-0041 | UAMES                   | 9204           | metacarpal        | CAMS-64393                     | 44,300                                 | 1,100                | -17.76                         | 1.16                          | 44,300                                                      | 1,100                | 45,889                   | 49,875 |                         | (1)    |
| <i>Rangifer</i> | <i>tarandus</i> | IK98-0687 | UAMES                   | 9596           | metapodial        | CAMS-64411                     | 45,500                                 | 1,200                | -17.22                         | 1.88                          | 45,460                                                      | 1,210                | 46,777                   | ...    |                         | (1)    |
| <i>Rangifer</i> | <i>tarandus</i> | IK98-1051 | UAMES                   | 10065          | metatarsal        | CAMS-64421                     | 46,300                                 | 1,400                | -18.72                         | 3.85                          | 46,300                                                      | 1,400                | 47,169                   | ...    |                         | (1)    |
| <i>Rangifer</i> | <i>tarandus</i> | IK98-1108 | UAMES                   | 9867           | metapodial        | CAMS-64422                     | 46,500                                 | 1,600                | -18.09                         | 3.32                          | 46,500                                                      | 1,600                | 43,705                   | 50,824 |                         | (1)    |

| Genus           | species          | field ID   | depository <sup>a</sup> | catalog number | skeletal element  | <sup>14</sup> CLab# and number | <sup>14</sup> C date reported (yrs BP) |                      | $\delta^{13}\text{C}$ ‰ (VPDB) | $\delta^{15}\text{N}$ ‰ (AIR) | $\delta^{13}\text{C}$ -normalized date used for calibration |                      | 95.4% calibrated range   |        | used in Monte Carlo (x) | source |
|-----------------|------------------|------------|-------------------------|----------------|-------------------|--------------------------------|----------------------------------------|----------------------|--------------------------------|-------------------------------|-------------------------------------------------------------|----------------------|--------------------------|--------|-------------------------|--------|
|                 |                  |            |                         |                |                   |                                | <sup>14</sup> C date                   | std dev <sup>e</sup> |                                |                               | <sup>14</sup> C date                                        | std dev <sup>e</sup> | (cal yr BP) <sup>f</sup> |        |                         |        |
| <i>Rangifer</i> | <i>tarandus</i>  | IK98-0351  | UAMES                   | 9108           | metatarsal        | CAMS-64402                     | 48,000                                 | 2,600                | -18.87                         | 4.32                          | 48,000                                                      | 2,600                | 43,681                   | 58,001 |                         | (1)    |
| <i>Rangifer</i> | <i>tarandus</i>  | IK98-0153  | UAMES                   | 9045           | humerus           | CAMS-64396                     | 48,300                                 | 1,700                | -18.11                         | 1.65                          | 48,300                                                      | 1,700                | 45,343                   | 53,031 |                         | (1)    |
| <i>Rangifer</i> | <i>tarandus</i>  | IK99-247   | UAMES                   | 10566          | humerus           | CAMS-64460                     | 52,000                                 | 2,700                | -18.51                         | 4.60                          | 52,000                                                      | 2,700                | 47,558                   | 62,773 |                         | (1)    |
| <i>Rangifer</i> | <i>tarandus</i>  | IK99-199   | UAMES                   | 12288          | metapodial        | CAMS-64458                     | 52,600                                 | 3,500                | -17.61                         | 1.75                          | 52,600                                                      | 3,500                | 47,511                   | 69,932 |                         | (1)    |
| <i>Rangifer</i> | <i>tarandus</i>  | IK99-740   | UAMES                   | 10876          | humerus           | CAMS-64472                     | 53,300                                 | 3,800                | -16.97                         | 2.91                          | 53,200                                                      | 3,800                | 47,987                   | 72,873 |                         | (1)    |
| <i>Rangifer</i> | <i>tarandus</i>  | IK98-0310  | UAMES                   | 8943           | humerus           | CAMS-64399                     | >46,900                                |                      | -19.71                         | 5.03                          | >46,900                                                     |                      | n/a                      | n/a    |                         | (1)    |
| <i>Rangifer</i> | <i>tarandus</i>  | IK98-1227  | UAMES                   | 9903           | humerus           | CAMS-64424                     | >47,200                                |                      | -18.50                         | 1.73                          | >47,200                                                     |                      | n/a                      | n/a    |                         | (1)    |
| <i>Rangifer</i> | <i>tarandus</i>  | TIT05-09   | UAMES                   | 29519          | tibia             | Beta-223268                    | >49,800                                |                      | -18.50                         | n/a                           | >49,800                                                     |                      | n/a                      | n/a    |                         | (1)    |
| <i>Rangifer</i> | <i>tarandus</i>  | IK98-1228  | UAMES                   | 9876           | humerus           | CAMS-64425                     | >49,900                                |                      | -18.03                         | 4.34                          | >49,900                                                     |                      | n/a                      | n/a    |                         | (1)    |
| <i>Rangifer</i> | <i>tarandus</i>  | IK99-286   | UAMES                   | 10726          | humerus           | CAMS-64461                     | >49,900                                |                      | -17.51                         | 2.01                          | >49,900                                                     |                      | n/a                      | n/a    |                         | (1)    |
| <i>Rangifer</i> | <i>tarandus</i>  | IK98-1158  | UAMES                   | 10053          | tibia             | CAMS-64423                     | >51,200                                |                      | -17.45                         | 0.14                          | >51,200                                                     |                      | n/a                      | n/a    |                         | (1)    |
| <i>Rangifer</i> | <i>tarandus</i>  | IK99-585   | UAMES                   | 10938          | mandible          | CAMS-64469                     | >51,700                                |                      | -17.17                         | 2.28                          | >51,700                                                     |                      | n/a                      | n/a    |                         | (1)    |
| <i>Rangifer</i> | <i>tarandus</i>  | IK98-0573  | UAMES                   | 9457           | mandible          | CAMS-64407                     | >52,800                                |                      | -19.71                         | 3.10                          | >52,800                                                     |                      | n/a                      | n/a    |                         | (1)    |
| <i>Rangifer</i> | <i>tarandus</i>  | IK98-1230  | UAMES                   | 9921           | metatarsal        | CAMS-64426                     | >54,000                                |                      | -17.84                         | 1.52                          | >54,000                                                     |                      | n/a                      | n/a    |                         | (1)    |
| <i>Saiga</i>    | <i>tatarica</i>  | n/a        | n/a                     | n/a            | cranium           | AA-3073                        | 28,930                                 | 560                  | n/a                            | n/a                           | 28,930                                                      | 560                  | 31,584                   | 34,072 | x                       | (11)   |
| <i>Saiga</i>    | <i>tatarica</i>  | USGS M1422 | n/a                     | n/a            | cranium           | GSC-3050                       | 37,000                                 | 990                  | n/a                            | n/a                           | 37,000                                                      | 990                  | 39,694                   | 43,123 | x                       | (2)    |
| <i>Ursus</i>    | <i>arctos</i>    | IK98-1065  | UAMES                   | 10003          | radius            | CAMS-53913                     | 36,310                                 | 780                  | -18.40                         | n/a                           | 36,310                                                      | 780                  | 39,411                   | 42,262 | x                       | (1)    |
| <i>Ursus</i>    | <i>arctos</i>    | n/a        | n/a                     | n/a            | n.r. <sup>b</sup> | AA-17510                       | 48,164                                 | 3,224                | n/a                            | n/a                           | 48,164                                                      | 3,224                | 43,235                   | 63,245 |                         | (12)   |
| <i>Ursus</i>    | <i>maritimus</i> | Coast09-1  | UAMES                   | 29513          | cranium           | Beta-283240                    | >43,500                                |                      | -11.70                         | n/a                           | >43,500                                                     |                      | n/a                      | n/a    |                         | (1)    |

<sup>a</sup> UAMES=University of Alaska Museum of the North Earth Sciences Collection

<sup>b</sup> Dated skeletal element not recorded by source.

<sup>c</sup> Duplicate dates were obtained for some samples. Both dates are reported here. The mean of both dates was used in analyses.

<sup>d</sup> <sup>14</sup>C age not normalized for  $\delta^{13}\text{C}$  by laboratory.

<sup>e</sup> Standard deviations for isotope and <sup>14</sup>C are one sigma, with the exception of ", " which indicate infinite date returned from laboratory.

<sup>f</sup> 95.4% Calibrated probability range calculated using OxCal 4.2 and the IntCal13 calibration curve.

<sup>g</sup> Although it is often challenging to distinguish *Mammuthus/Mammot* and *Ovibos/Bootherium* using postcranial elements, *Mammot* and *Bootherium* were both forest-dependent animals and there were no trees growing north of the Brooks range during the interval studied here (12-45 cal ka BP) (all dated black spruce and poplar logs from the study site yield non-finite <sup>14</sup>C ages); we therefore classify appropriate postcranial elements as either *Mammuthus* or *Ovibos*.

\*  $\delta^{13}\text{C}$  values not reported from dating laboratory; this value was estimated based on mean of measured  $\delta^{13}\text{C}$  values for that genus from this data set and used for

normalizing dates prior to calibration.

<sup>x</sup> These laboratory numbers each appear twice in Guthrie (2004) and are probably transcription errors. Because the rest of each record is distinct, we include both dates here.

<sup>#</sup> Laboratory Codes: AA=Arizona Accelerator Mass Spectrometry Laboratory , USA; AAR=University of Aarhus, Denmark; Beta=Beta Analytic, USA; CAMS=Lawrence Livermore National Laboratory Center for Accelerator Mass Spectrometry , USA; GaK=Gakushuin University, Japan; GSC=Geological Survey, Canada; GX=Geochron Laboratories, USA; I=Teledyne Isotopes, USA; OxA=Oxford Radiocarbon Accelerator Unit, England; P=Univ. of Pennsylvania, USA; Shell=Shell Development Co., USA; SM=Mobil Oil Corp., Dallas, USA; TO=IsoTrace Laboratory, Canada; UCIAMS=University of California, Irvine Keck Carbon Cycle Accelerator Mass Spectrometry Laboratory, USA; UGa=University of Georgia, USA; USGS=USGS, Menlo Park, USA.

## 2- RANGE ECOLOGY IN ARCTIC ALASKA DURING THE ICE AGE

As Guthrie (9, 11) emphasized, the relatively high species diversity and abundance of megafaunal herbivores that were present in Alaska when it supported mammoth steppe vegetation indicate that range quality was much higher than it is today (1, 13). Moreover, these mammals invested heavily in large tusks, horns, and antlers that could only have been fueled by a productive landscape (14). We also know that the average size of horses rapidly shrank as mammoth steppe vegetation was replaced by shrub tundra at the end of the Pleistocene in Interior Alaska (15). Species diversity, biomass, investments in energy-expensive anatomy, and trends in body size all support the idea that the nutritional status of the mammoth steppe was much higher than that of the present-day vegetation cover, at least during brief episodes of maximum megafaunal abundance.

The nutritional value of vegetation is directly influenced by soil processes, and nitrogen (N) availability illustrates some of the complexities involved (16). N is important because it is a crucial component of protein. In the Arctic, N cycling is slow in moss-dominated vegetation growing on cold, wet soils because of the low nutrient content of the plant litter and the slow rates of decomposition and hence of nutrient turnover (17). Restricted N cycling is probably one of the reasons why horse bone collagen  $\delta^{15}\text{N}$  values became less positive at the end of the ice age, as organic soils spread (Fig. 5). N cycling was probably significantly faster in the well-drained soils and moss-scarce vegetation cover of the mammoth steppe.

The availability of nutrients like N to herbivores is further conditioned by the highly evolved, anti-herbivore strategies of plants. The total amount of available N matters less for herbivores than does its form and palatability (9). For instance, foliar N concentrations in moist acidic tundra (a widespread vegetation type on the North Slope today) are about the same as in moist non-acidic tundra (a drier, less peaty vegetation type growing in some areas of the North Slope). Nonetheless, megafaunal herbivores like caribou prefer the latter (18). Hence, a nutrient's distribution in time and space can be less important than the palatability of the plants containing that nutrient.

Many of the plant species growing in the moist acidic tundra vegetation that covers much of the North Slope of Alaska today are well-defended from grazers by unpalatable secondary compounds (17, 19). Such defenses are necessary for these plants' persistence because paludified soils tend to be cold, wet, and nutrient poor. Consequently, resident plant species must pursue conservative growth strategies restricted by the scant supply of nutrients (13, 20). To maintain this conservative strategy, they must avoid being eaten, and so there has been ecological sorting favoring plants whose secondary compounds make them unavailable to herbivores (18, 21).

Further clues about the grazing system that operated on the mammoth steppe come from the nature of the present-day, moist non-acidic tundra (22), that non-peat-accumulating vegetation type found on some parts of the North Slope where loess deposition still occurs. Caribou prefer this vegetation type over the more peat-rich, moist acidic tundra because

it contains relatively palatable plants. Moist non-acidic tundra is relatively high in calcium, an important nutrient in animal growth. Today, caribou heavily rely on this type throughout the year, especially during the calving season (18).

The nutritional value of vegetation is indirectly influenced by the foraging efficiency of the herbivore utilizing that vegetation, and foraging efficiency depends in part on the efficacy of locomotion, especially in rangelands like the mammoth steppe where primary productivity was probably relatively low, highly seasonal, and widely dispersed in space. Firm footing would have enabled large-bodied animals like horse, mammoth, and bison that had relatively small feet to range widely and hence forage efficiently even in cold, dry rangelands. But as tundra vegetation and organic soils replaced the mammoth steppe and the ground surface became boggy and peat-covered, mobility was inhibited and required more food energy for taxa with high indices of foot-loading (9).

To summarize, the relatively high species diversity and large biomass of Pleistocene megafauna on the North Slope testifies to the relatively high productivity of this vanished biome. Our results suggest these peaks in primary productivity and megafaunal biomass occurred infrequently and episodically, but nonetheless did occur. Today's cold, wet soils restrict nutrient cycling and create nutrient limitations that favor plants investing in long-lived foliage, and hence in chemical and physical traits discouraging herbivory. Animal mobility and forage quality are closely interconnected because restrictions on movement increase nutritional demands. As Guthrie (9) emphasized, the spread of organic soils and concomitant increases in snow depths during the Pleistocene-Holocene transition would have challenged the mobility of megafauna like horse, bison, and mammoth who possessed high foot-loading indices at the same time that the spread of peat-associated plants lowered the nutritional quality of their arctic rangelands.

### 3- COLLAGEN EXTRACTION, ULTRAFILTRATION, AND CORRECTING <sup>14</sup>C-CALIBRADION NOISE

**Collagen extraction** Without exception, every bone we attempted to date. This high degree of preservation is attributable to the anoxic and/or frozen state in which these bones were stored in nature. For the samples we dated, the bone collagen was prepared for dating as follows. Bones were manually inspected, and outer surfaces were cleaned by abrasion. All the bones we dated were freshly collected from the field and therefore had no surface contamination requiring solvent extraction. Two to ten grams of abraded bone were placed in a beaker with 0.2N HCl at 20 degrees Celsius (< pH 1). The sample was inspected several times daily to monitor demineralization and collagen evolution. Where possible, the initially evolved collagen was removed and discarded to reduce physical contamination. The underlying collagen was then collected for further pretreatment. Once sufficient collagen was available, it was separated from the remaining mineral fraction and rinsed to neutrality with deionized water. It was then placed in 1-2 % reagent grade NaOH for two hours. The actual concentration and exposure of each sample to the alkali solution was regulated depending on the preservation state of the collagen. Any extraneous matter (roots, sand, etc.) was simultaneously removed during repetitions of this step. This was repeated until the solution was clear or until diminishing returns on the collagen remaining was reached.

#### Ultrafiltration

In permafrost and fluvial settings, where plant roots rarely penetrate more than several decimeters into the ground, the most problematic aspect of <sup>14</sup>C-dating bone collagen is contamination by younger organic matter carried by groundwater. As a bone decomposes, its collagen can bind with younger humic substances, which are abundant in certain settings (23). Contamination of older bones by younger humic substances is generally unimportant when the bone is relatively young, say < 20,000 years, but it can significantly skew the dating result when the true age of the bone is > 40,000 years because by this time approximately seven <sup>14</sup>C half-lives have passed, and only about 0.8% of the initial <sup>14</sup>C remains. Humic compounds derived from older organic matter also can contaminate bone collagen, but contamination by older carbon has comparatively minor effects on the resultant <sup>14</sup>C age (24).

The main laboratory technique used to counter the potential effects of contamination of collagen by younger organic compounds is ultrafiltration (25). Ultrafiltration separates the higher molecular weight components of the gelatinized collagen from the lower molecular weight components that include humic and fulvic acids bound to partly degraded collagen (26, 27). In some depositional settings, such as limestone caves located in the temperate zone, the use of ultrafiltration to remove the younger, organic contaminants from bone samples has resulted in ages 2,000 to 7,000 years older than non-ultrafiltered dates on the same samples (28-30).

Although first devised more than twenty years ago (25), the ultrafiltration technique continues to evolve, and has only become commercially available in the last several years. Its utility is still debated. In cases where bone preservation is excellent and



contamination by younger organics is minimal, ultrafiltration may be unnecessary (31, 32). Further subsampling of already tiny amounts of  $^{14}\text{C}$  increases the risks of other types of contamination. In some instances, the filter membrane itself has been found to introduce younger carbon into samples (33, 34).

Before ultrafiltration became commercially available, large numbers of  $^{14}\text{C}$  dates were obtained on bone collagen using non-ultrafiltration techniques. For instance, we (1) reported finite ages for 245 bones of Pleistocene megafauna from the North Slope of Alaska and used these ages to infer paleoenvironments and extinction causes. Given what is now known about ultrafiltration techniques, it is reasonable to ask whether these non-ultrafiltered dates are valid.

The presence of permafrost creates very different preservational environments for bone than the limestone caves of Europe studied by Highham et al. (28, 29). Apart from one, recent study (6), there have been no large-scale comparisons between ultrafiltered and non-ultrafiltered  $^{14}\text{C}$  ages estimated from bones from arctic settings. That study re-dated six mastodon (*Mammot americanum*) bones from Alaska and the Yukon previously dated using non-ultrafiltration methods. Of the six mastodon teeth collected on Alaska's North Slope, non-ultrafiltration methods produced three non-finite  $^{14}\text{C}$  ages and three  $^{14}\text{C}$  ages ranging between 31,780 and 38,800 cal yr BP (6). Repeated dating of ultrafiltered collagen resulted in non-finite ages for these three teeth as well, suggesting that these first dates had been contaminated by young carbon.

Mastodon teeth preserved in the sediment of an arctic river provide an ideal setting for humic contamination of bone collagen. The risk of obtaining an erroneous, younger date on bone collagen because of contamination by younger humic substances is greatest when a bone whose own  $^{14}\text{C}$  has long since decayed away is exposed to dissolved organic compounds with younger  $^{14}\text{C}$  content over tens of thousands of years. Hence using ultrafiltration to re-date the collagen of a taxon like mastodon that has been locally extinct for at least 75,000 years has a high likelihood of revising the  $^{14}\text{C}$  age upward. The likelihood is much lower that ultrafiltration will significantly revise  $^{14}\text{C}$  ages obtained by non-ultrafiltration methods on the bones of animals that were alive <45,000 years ago. Preliminary results of a study we are now engaged in support this assertion.

To examine the effects of using ultrafiltration in dating of permafrost bones, we randomly selected 30 bones of *Equus*, *Bison*, and *Ovibos* collected along the Ikpikpuk River whose non-ultrafiltered  $^{14}\text{C}$  ages ranged between 11 and 46  $^{14}\text{C}$  ka BP. These non-ultrafiltered dates on bone collagen were obtained using accelerator mass spectrometry at Beta Analytic Inc. in the years prior to 2013. Starting in 2013, we submitted additional bone samples from these same thirty bones to Beta Analytic for ultrafiltration and AMS dating of collagen.

Results show that differences between ultrafiltered and non-ultrafiltered dates increase at ages greater than 30,000  $^{14}\text{C}$  years BP (roughly 5 half lives), when remaining  $^{14}\text{C}$  content drops below a few percent of its initial value (Fig. S1). Interestingly, the age differences between the two techniques are equally spread in both directions. In ten of the date pairs, the non-ultrafiltered date was older than the ultrafiltered one; while in eleven of the date

pairs, the ultrafiltered date was younger. This project is still in progress, but these preliminary results indicate that the use of ultrafiltration in  $^{14}\text{C}$  dating of bone collagen sourced from permafrost settings like Alaska's North Slope does not systematically "correct"  $^{14}\text{C}$  dates obtained using non-ultrafiltration methods, and so ultrafiltration is unwarranted when dating bone collagen from this particular depositional environment.

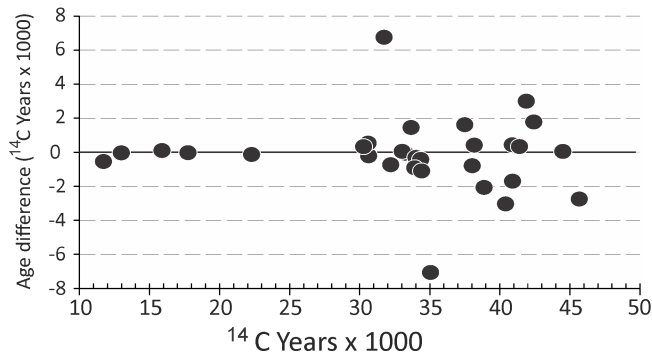

**Fig. S1.** Differences in  $^{14}\text{C}$  ages obtained after ultrafiltration and non-ultrafiltration pretreatment of collagen from the same megafauna bones. Thirty bones (ten each of horse, bison, and musk ox) from the North Slope were chosen to span the age range from 10 to 45 cal ka BP based on their initial, non-ultrafiltered  $^{14}\text{C}$  ages. Age differences are calculated by subtracting the ultrafiltered from non-ultrafiltered dates. Although previous studies in some temperate-zone settings have found that ultrafiltration can remove younger contaminants that cause systematic "younging" of  $^{14}\text{C}$  ages, these results indicate ultrafiltration is not necessary for dating bones < 45,000 years old that are sourced from permafrost environments.

### Coping with calibration noise in the cumulative probability distributions of $^{14}\text{C}$ dates

$^{14}\text{C}$  dates are frequently combined into cumulative probability distributions for time-series analyses following their calibration to calendar years (35, 36). These cumulative probability distributions (CPDs) depict changes in the abundance of dated samples through time. Some peaks and valleys in cumulative probability distributions of calibrated  $^{14}\text{C}$  dates are artifacts resulting from the calibration process (Fig. S2) (36, 37). At steep parts of the curve, multiple  $^{14}\text{C}$  dates can correspond to nearly identical calendar ages. On plateaus,  $^{14}\text{C}$  ages can correspond to widely spaced calendar ages, some of which may be reversed in age relative to their corresponding  $^{14}\text{C}$  ages.

Various methods have been proposed to remove calibration artifacts from the CPDs of  $^{14}\text{C}$  dates. Williams (36) used moving averages to reduce calibration effects. Johnstone et al. (38) subtracted a curve generated from a uniform distribution based on the observed CPD. Hoffman et al. (39) suggested dividing the observed CPD by a CPD derived from a uniform distribution or dividing the CPD derived from a subset of the data by the CPD of the entire dataset. Chiverrell et al. (40) and Perry et al. (41) suggested avoiding use of CPDs altogether.

These previous methods of dealing with calibration artifacts in the CPDs of  $^{14}\text{C}$  dates all have their limitations. For studies like ours, where our goal is to compare a CPD to

climate history, moving averages smooth out the very peaks we seek to compare, while comparisons between observed CPD and theoretical CPDs - like those derived from uniformly distributed radiocarbon dates - do not entirely remove the calibration effect.

Although structured as a Monte Carlo hypothesis test, we consider our new method to be a data- exploration technique in the sense of Tukey (42) for identifying events that are unlikely to occur by chance, rather than a test with a rigid *accept-reject* significance criterion (43). Note that this Monte Carlo approach is vulnerable to type II errors (failing to detect an effect that is actually present) because of the limited number of dated bones. If we had 1000 instead of just 263 bones, additional peaks in the CPD curve would undoubtedly prove to be significantly different from the simulated background. Minima in the CPD are particularly vulnerable to type II errors because they represent the periods where dates are rare in an already small dataset. Therefore it is the presences rather than the absences of statistically significant peaks in bone abundance that provide the most informative temporal patterns.

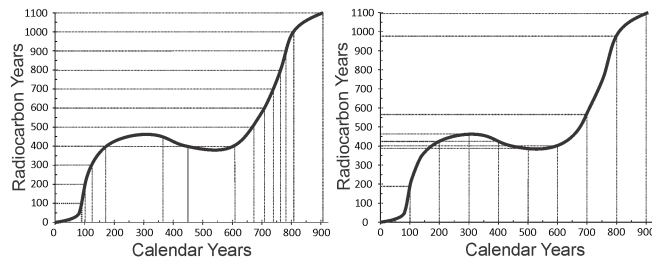

**Fig. S2.** Hypothetical radiocarbon-calibration curves being used to correct  $^{14}\text{C}$  dates to calendar years. Because the amount of radiocarbon in Earth's atmosphere has fluctuated, the  $^{14}\text{C}$  -calibration curve wiggles through time. As a result, evenly spaced  $^{14}\text{C}$  ages (*left*) correspond to clusters of calibrated (calendar) ages at the steep portions of the calibration curve. Evenly spaced calendar ages (*right*) correspond  $^{14}\text{C}$  ages clustering on plateaus in the curve. These calibration effects generate peaks in any cumulative probability distribution (CPD) composed of a large series of calibrated  $^{14}\text{C}$  dates and need to be taken into account before making any inferences based on temporal patterns displayed by the CPD.

#### 4- TAPHONOMY

The megafaunal bones we studied come from low-energy floodplains in an arctic, permafrost environment. Their often exceptional states of morphological and chemical preservation regardless of age, combined with the rarity of specimens displaying root etching, indicate most of them were never exposed to chemical weathering in soils. Instead, most of these bones appear to have been stored in anoxic and/or permanently frozen states for millennia.

As detailed in an earlier paper (1), there are two main pathways for bone deposition and preservation in the Ikpikpuk and Titaluk River valleys where most of these bones originate. Upstream of the loess belt (a 50-km wide area where windblown silts accumulated downwind of the now stabilized Ikpikpuk Sand Sea), most bones were deposited in the active stream channel. The rarity of scavenger gnawing suggests rapid burial by sediment. Concentrations of bones occur where the channel crosses beds of clay, suggesting these are places where animals were bogged down. A different mechanism of bone accumulation operated within the loess belt where large ice wedges provided another type of natural trap. Ongoing loess deposition buried these remains, and lateral erosion of river channels later carved into these loess deposits, reworking bones into the active channel. This process can occasionally be seen occurring today along eroding cut banks.

Once entering the river channel through either of the two pathways, bones gradually work their way downward through the sediment column through a process of elutriation until they end up concentrated below the water table under anoxic conditions. If the active channel shifts elsewhere on the floodplain, the bones become incorporated in permafrost. Given the sheer number of bones, the fact that the collections span two different drainage basins, the diversity of bone ages, and the complexity of the taphonomic pathways, we think it unlikely that multiple bones of the same individual of any taxon have been dated in this study.

Most of the bones we dated come from upstream of the loess belt, so we think that death-in-the-channel has been the dominant taphonomic pathway. Unlike the loess belt, where bone preservation probably varied according to the rate of aeolian sedimentation, bones have been incorporated, elutriated, and stored in the floodplains regardless of whether the channels were aggrading or incising. The upper reaches of both the Ikpikpuk and Titaluk Rivers have progressively incised their floodplains since ca. 7500 years ago (44), yet abundant wood and bones of moose, muskoxen and caribou continue to enter via this taphonomic pathway. We have found no support for the alternate hypothesis that the highs and lows in bone abundance through time are the result of differential weathering under different vegetation covers or from differential deposition/preservation under differing geomorphic regimes.

## REFERENCES CITED

1. Mann DH, Groves P, Kunz ML, Reanier RE, & Gaglioti BV (2013) Ice-age megafauna in Arctic Alaska: extinction, invasion, survival. *Quaternary Sci Rev* 70:91-108.
2. Harington CR (2003) *Annotated Bibliography of Quaternary Vertebrates of Northern North America* (University of Toronto Press, Toronto).
3. Shapiro B, *et al.* (2004) Rise and fall of the Beringian steppe bison. *Science* 306(5701):1561-1565.
4. Guthrie RD & Stoker S (1990) Paleoecological Significance of Mummified Remains of Pleistocene Horses from the North Slope of the Brooks Range, Alaska. *Arctic* 43(3):267-274.
5. Lorenzen ED, *et al.* (2011) Species-specific responses of Late Quaternary megafauna to climate and humans. *Nature* 479(7373):359-U195.
6. Zazula GD, *et al.* (2014) American mastodon extirpation in the Arctic and Subarctic predates human colonization and terminal Pleistocene climate change. *P Natl Acad Sci USA* 111(52):18460-18465.
7. Guthrie RD (2004) Radiocarbon evidence of mid-Holocene mammoths stranded on an Alaskan Bering Sea island. *Nature* 429(6993):746-749.
8. Gal R (1982) An annotated and indexed roster of archaeological radiocarbon dates from Alaska, north of 68° latitude. *Archaeological Investigations in the National Petroleum Reserve in Alaska* 2:159-180.
9. Guthrie RD (1990) *Frozen Fauna of the Mammoth Steppe: The Story of Blue Babe* (University of Chicago Press, Chicago, IL).
10. Barnett R, *et al.* (2009) Phylogeography of lions (*Panthera leo* ssp.) reveals three distinct taxa and a late Pleistocene reduction in genetic diversity. *Mol Ecol* 18(8):1668-1677.
11. Guthrie RD (2001) Origin and causes of the mammoth steppe: a story of cloud cover, woolly mammal tooth pits, buckles, and inside-out Beringia. *Quaternary Sci Rev* 20(1-3):549-574.
12. Barnes I, Matheus P, Shapiro B, Jensen D, & Cooper A (2002) Dynamics of Pleistocene population extinctions in Beringian brown bears. *Science* 295(5563):2267-2270.
13. Zimov SA, *et al.* (1995) Steppe-Tundra Transition - a Herbivore-Driven Biome Shift at the End of the Pleistocene. *Am Nat* 146(5):765-794.
14. Guthrie RD (1984) Mosaics, allelochemicals and nutrients. *Quaternary extinctions, a Prehistoric Revolution*, eds Martin PS & Klein RG (University of Arizona Press, Tucson, AZ), pp 259-298.
15. Guthrie RD (2003) Rapid body size decline in Alaskan Pleistocene horses before extinction. *Nature* 426(6963):169-171.
16. Aerts R & Chapin FS (2000) The mineral nutrition of wild plants revisited: A re-evaluation of processes and patterns. *Adv Ecol Res* 30:1-67.
17. Chapin FS, Mckendrick JD, & Johnson DA (1986) Seasonal-Changes in Carbon Fractions in Alaskan Tundra Plants of Differing Growth Form - Implications for Herbivory. *J Ecol* 74(3):707-731.
18. Walker DA, *et al.* (2001) Calcium-rich tundra, wildlife, and the "Mammoth Steppe". *Quaternary Sci Rev* 20(1-3):149-163.
19. Chapin FS, Johnson DA, & Mckendrick JD (1980) Seasonal Movement of Nutrients in Plants of Differing Growth Form in an Alaskan Tundra Ecosystem - Implications for Herbivory. *J Ecol* 68(1):189-209.
20. Zimov SA, Zimov NA, & Chapin FS (2012) The past and future of the mammoth steppe ecosystem. *Paleontology in Ecology and Conservation*, ed Louys J (Springer-Verlag, Berlin), pp 193-225.

21. White RG & Trudell J (1980) Habitat Preference and Forage Consumption by Reindeer and Caribou near Atkasook, Alaska. *Arctic Alpine Res* 12(4):511-529.
22. Walker DA, *et al.* (1998) Energy and trace-gas fluxes across a soil pH boundary in the arctic. *Nature* 394(6692):469-472.
23. Vanklinken GJ & Hedges REM (1995) Experiments on Collagen Humic Interactions - Speed of Humic Uptake, and Effects of Diverse Chemical Treatments. *J Archaeol Sci* 22(2):263-270.
24. Bowman S (1995) *Radiocarbon Dating* (British Museum Press, London).
25. Brown TA, Nelson DE, Vogel JS, & Southon JR (1988) Improved Collagen Extraction by Modified Longin Method. *Radiocarbon* 30(2):171-177.
26. Brock F, Geoghegan V, Thomas B, Jurkschat K, & Higham TFG (2013) Analysis of Bone "Collagen" Extraction Products for Radiocarbon Dating. *Radiocarbon* 55(2-3):445-463.
27. Higham TFG, Jacobi RM, & Ramsey CB (2006) AMS radiocarbon dating of ancient bone using ultrafiltration. *Radiocarbon* 48(2):179-195.
28. Higham T (2011) European Middle and Upper Palaeolithic radiocarbon dates are often older than they look: problems with previous dates and some remedies. *Antiquity* 85(327):235-249.
29. Higham T, *et al.* (2014) The timing and spatiotemporal patterning of Neanderthal disappearance. *Nature* 512(7514):306-309.
30. Jacobi RM, Higham TFG, & Ramsey CB (2006) AMS radiocarbon dating of Middle and Upper Palaeolithic bone in the British Isles: improved reliability using ultrafiltration. *J Quaternary Sci* 21(5):557-573.
31. Hajdas I, Michczynski A, Bonani G, Wacker L, & Furrer H (2009) Dating Bones near the Limit of the Radiocarbon Dating Method: Study Case Mammoth from Niederweningen, Zh Switzerland. *Radiocarbon* 51(2):675-680.
32. Minami M, Sakata K, Takigami M, Nagaoka T, & Nakamura T (2013) Ultrafiltration Pretreatment for C-14 Dating of Fossil Bones from Archaeological Sites in Japan. *Radiocarbon* 55(2-3):481-490.
33. Brock F, Ramsey CB, & Higham T (2007) Quality assurance of ultrafiltered bone dating. *Radiocarbon* 49(2):187-192.
34. Hüls CM, Grootes PM, & Nadeau MJ (2009) Ultrafiltration: Boon or Bane? *Radiocarbon* 51(2):613-625.
35. Contreras DA & Meadows J (2014) Summed radiocarbon calibrations as a population proxy: a critical evaluation using a realistic simulation approach. *J Archaeol Sci* 52:591-608.
36. Williams AN (2012) The use of summed radiocarbon probability distributions in archaeology: a review of methods. *J Archaeol Sci* 39(3):578-589.
37. Guilderson TP, Reimer PJ, & Brown TA (2005) The boon and bane of radiocarbon dating. *Science* 307(5708):362-364.
38. Johnstone E, Macklin MG, & Lewin J (2006) The development and application of a database of radiocarbon-dated Holocene fluvial deposits in Great Britain. *Catena* 66(1-2):14-23.
39. Hoffmann T, Lang A, & Dikau R (2008) Holocene river activity: analysing (14)C-dated fluvial and colluvial sediments from Germany. *Quaternary Sci Rev* 27(21-22):2031-2040.
40. Chiverrell RC, Thorndycraft VR, & Hoffmann TO (2011) Cumulative probability functions and their role in evaluating the chronology of geomorphological events during the Holocene. *J Quaternary Sci* 26(1):76-85.
41. Perry GLW, Wheeler AB, Wood JR, & Wilmshurst JM (2014) A high-precision chronology for the rapid extinction of New Zealand moa (Aves, Dinornithiformes). *Quaternary Sci Rev* 105:126-135.

42. Tukey JW (1977) *Exploratory Data Analysis* (Addison Wesley, Reading, MS).
43. Kempthorpe O & Doerfler TE (1969) Behaviour of some significance tests under experimental randomization. *Biometrika* 56(2):231-248.
44. Mann DH, Groves P, Reanier RE, & Kunz ML (2010) Floodplains, permafrost, cottonwood trees, and peat: What happened the last time climate warmed suddenly in arctic Alaska? *Quaternary Sci Rev* 29(27-28):3812-3830.
